# Supplementary material for: Indium-Catalyzed Direct Conversion of Lactones into Thiolactones Using a Disilathiane as a Sulfur Source
Source: Molecules. 2018 Jun 2;23(6):1339. doi: 10.3390/molecules23061339 (PMC6100358; doi:10.3390/molecules23061339)

**Supplementary Materials**  
**for**  
**Indium-Catalyzed Direct Conversion of Lactones into Thiolactones**  
**Using a Disilathiane as a Sulfur Source**

Yohei Ogiwara, Ken Takano, Shuhei Horikawa, and Norio Sakai\*

*Department of Pure and Applied Chemistry, Faculty of Science and Technology  
Tokyo University of Science, 2641 Yamazaki, Noda, Chiba 278-8510, Japan*

sakachem@rs.noda.tus.ac.jp

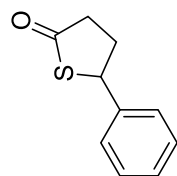

2a

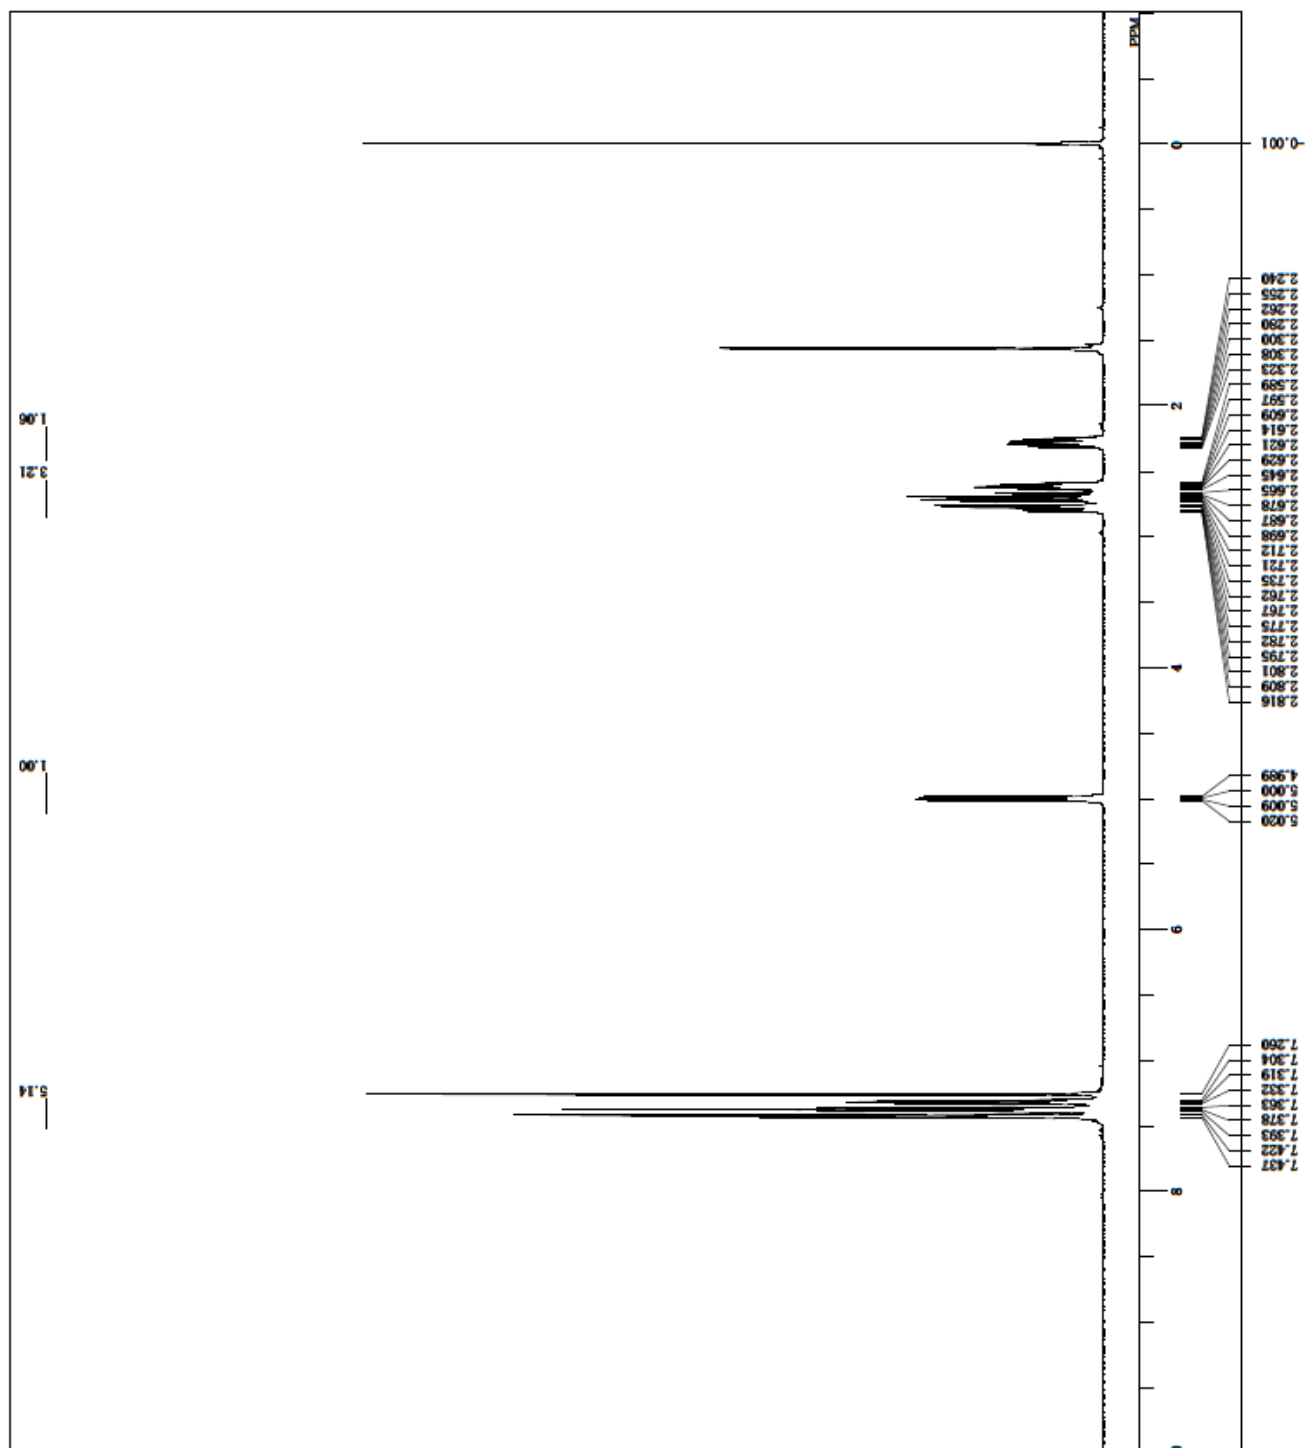

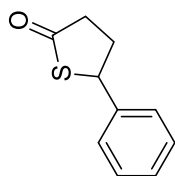

2a

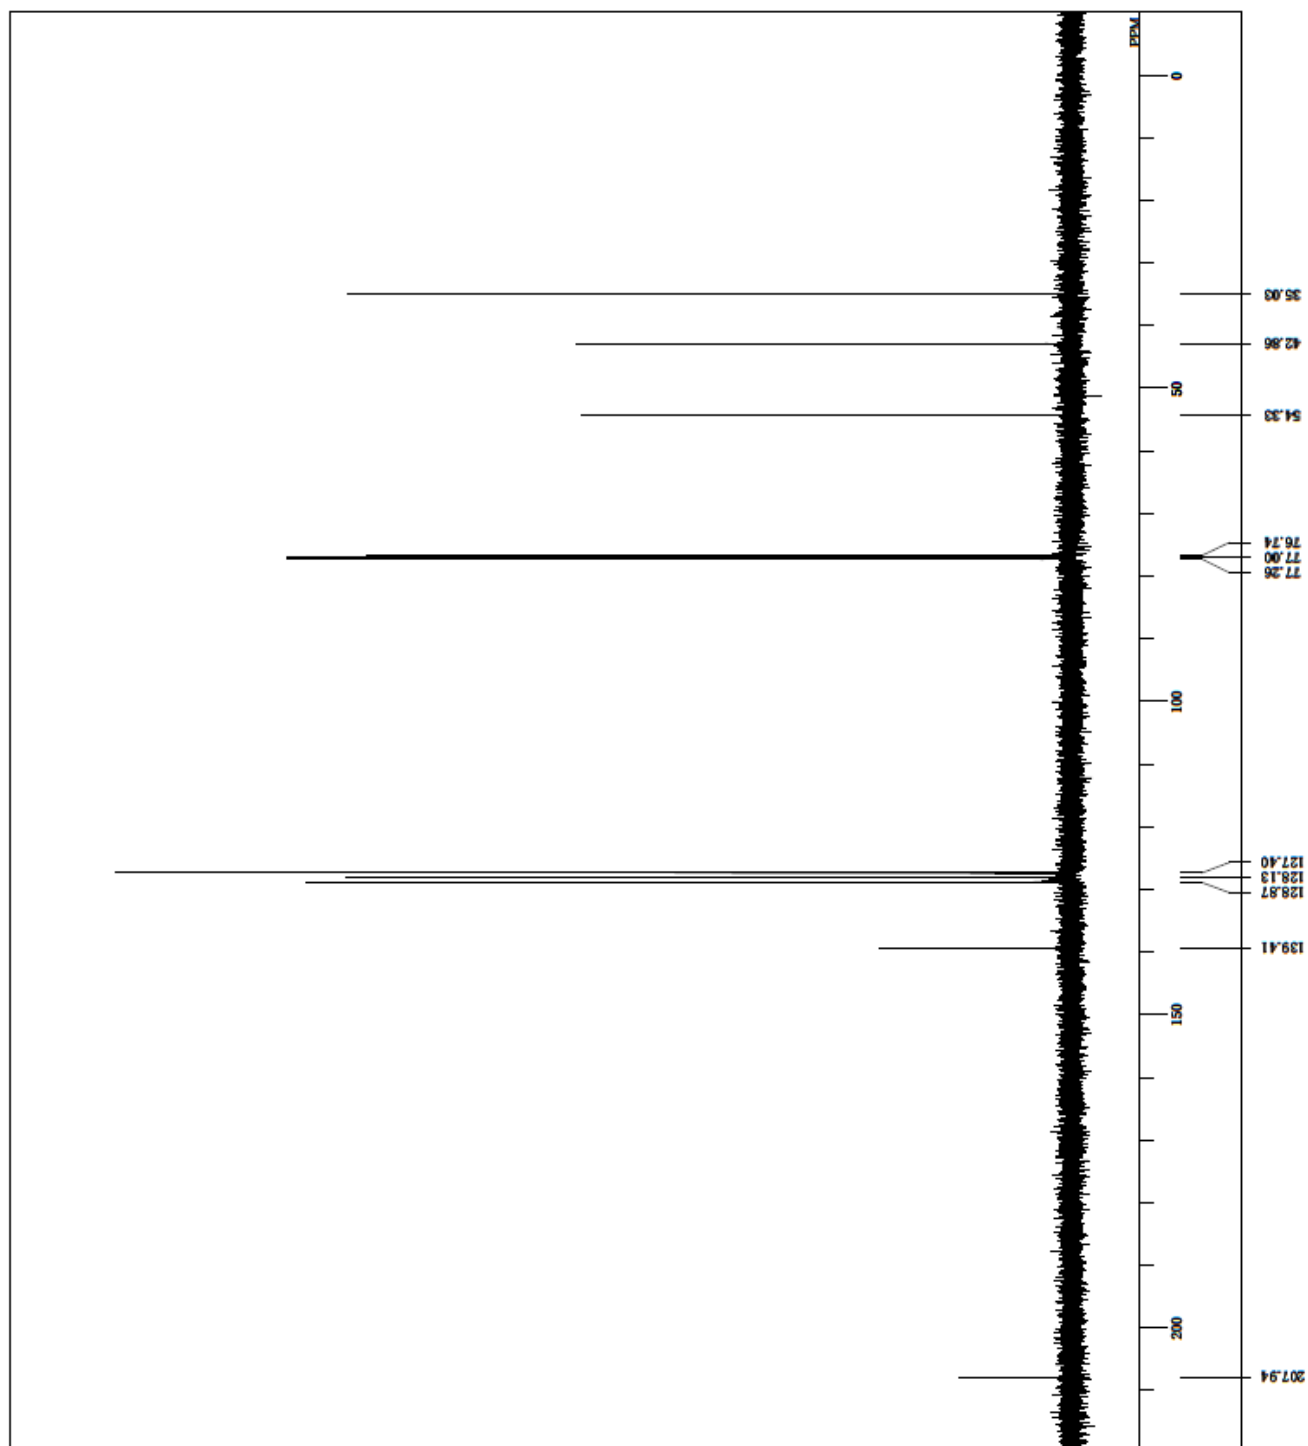

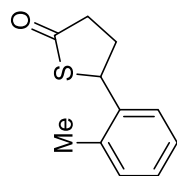

2b

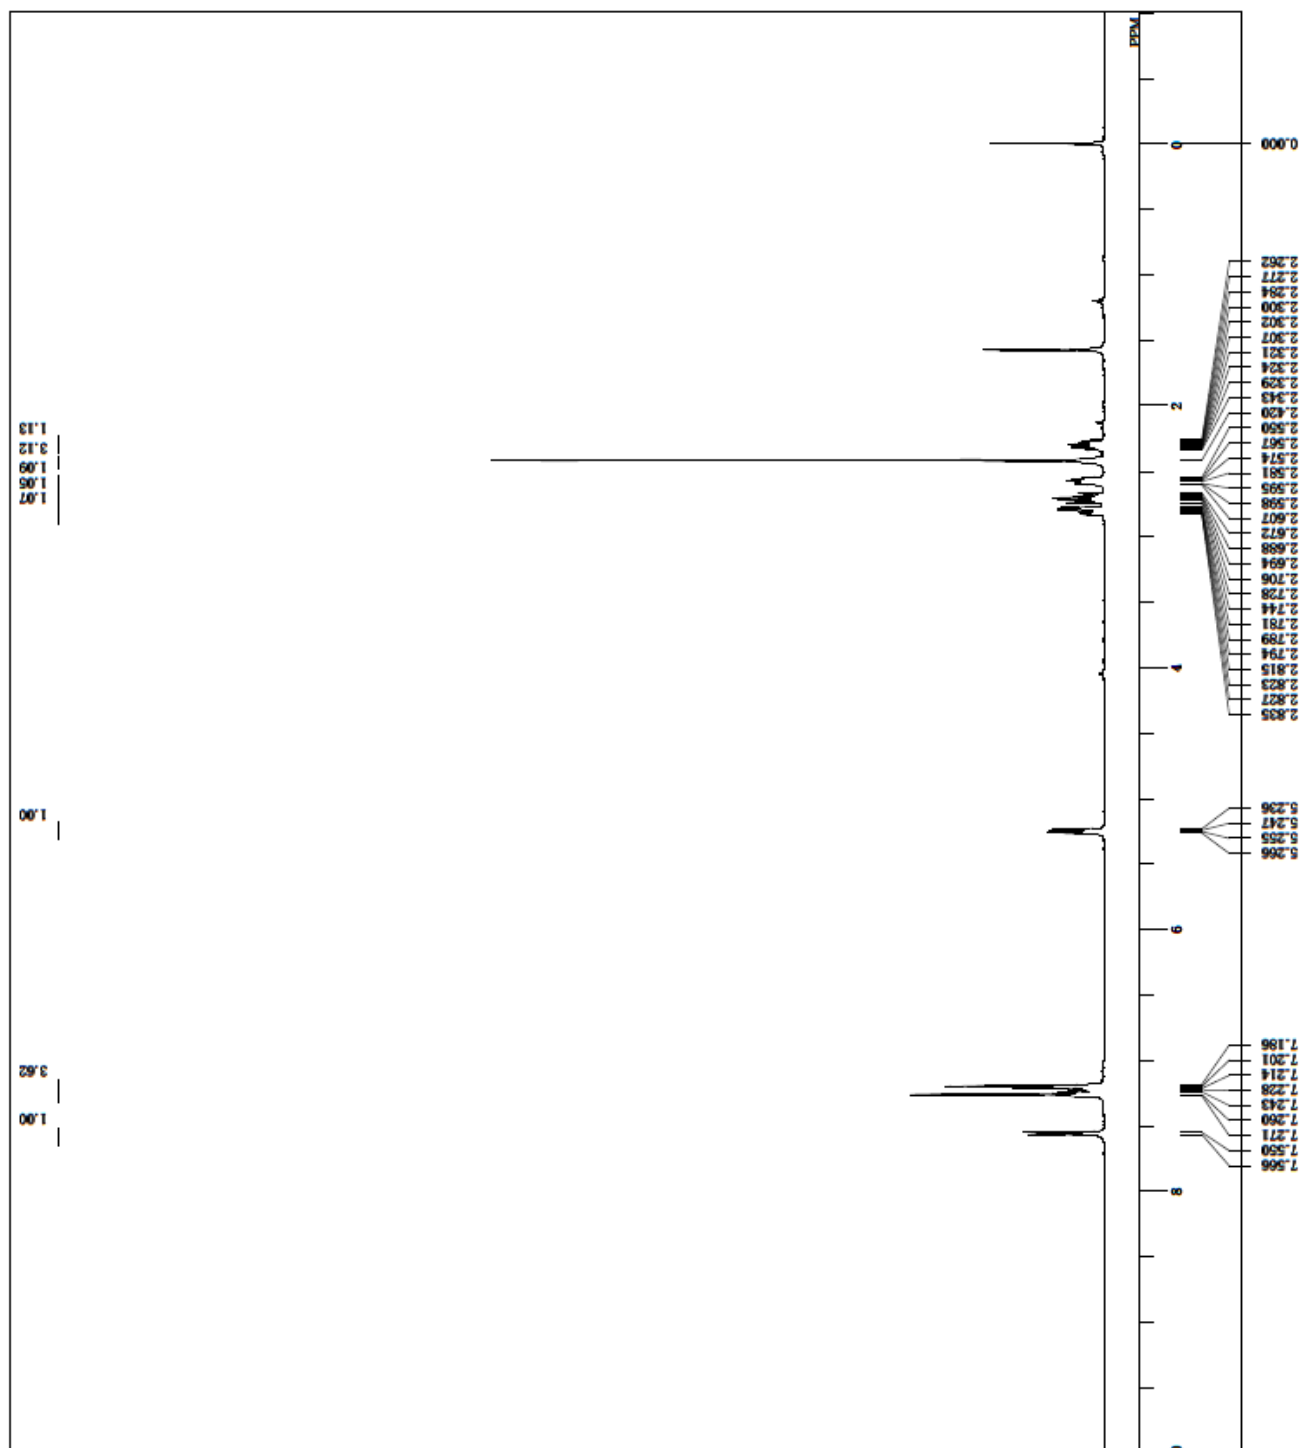

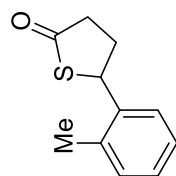

2b

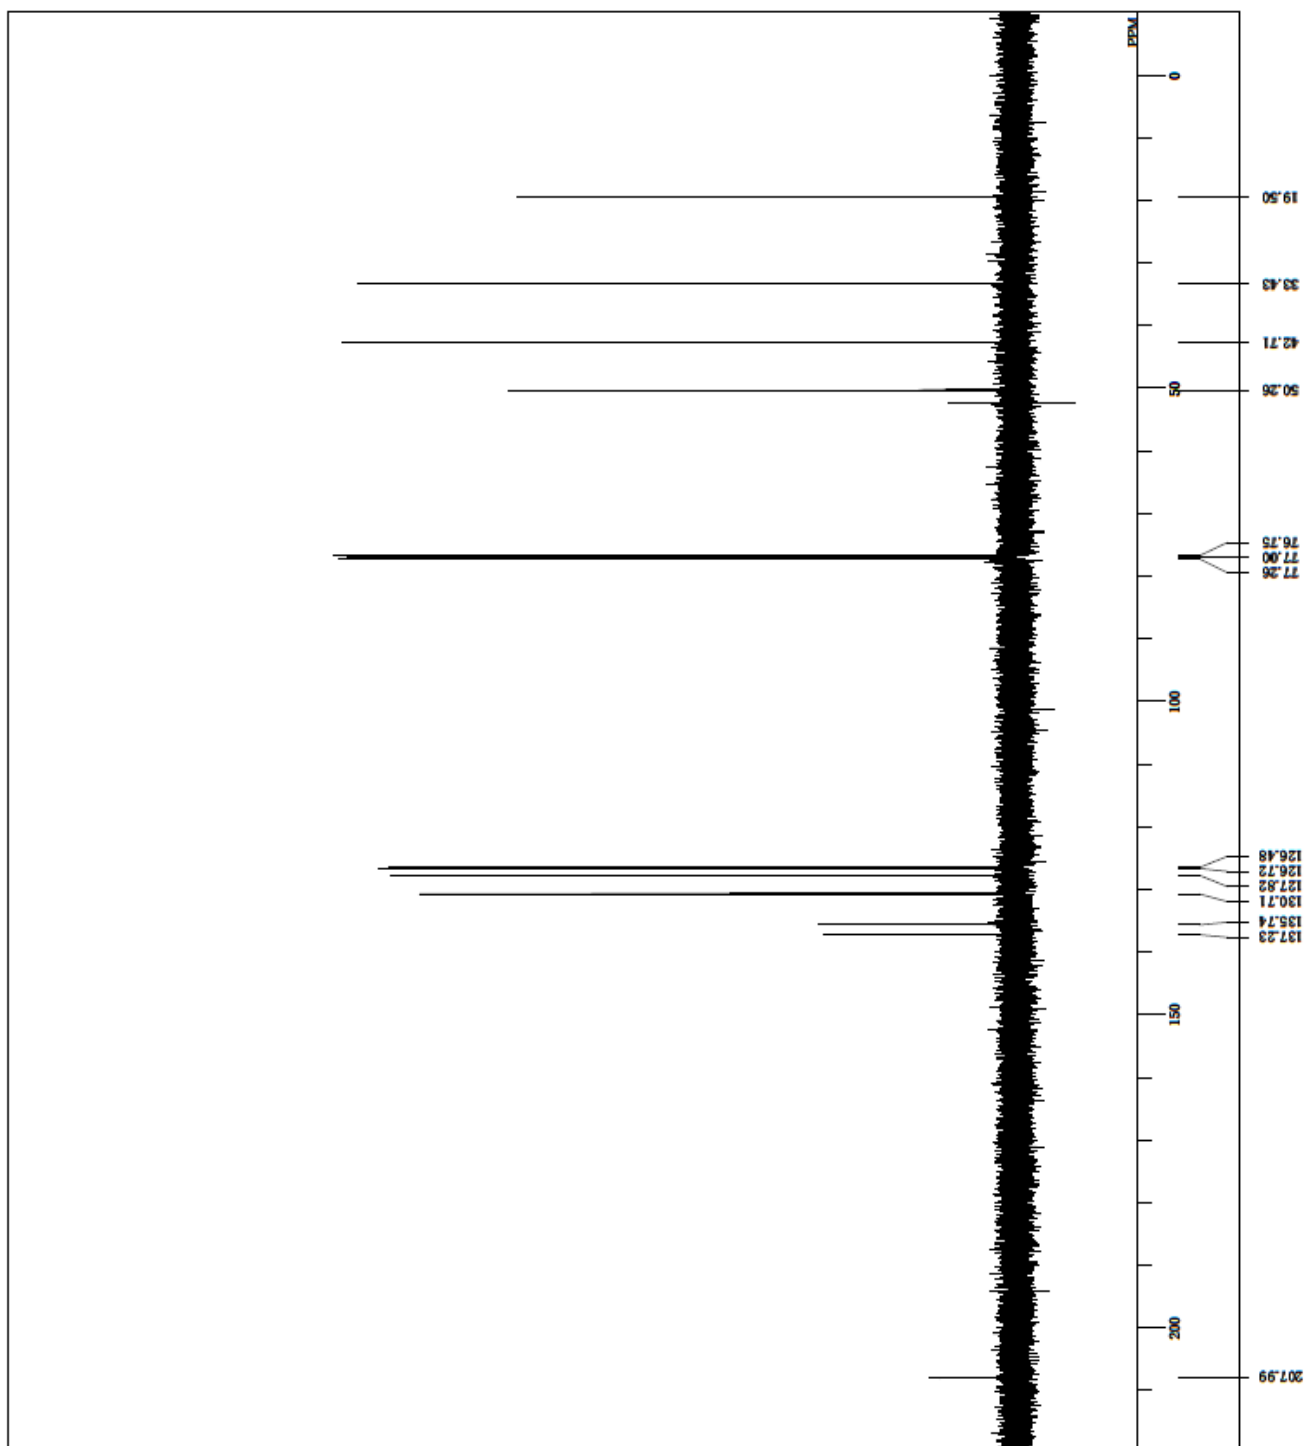

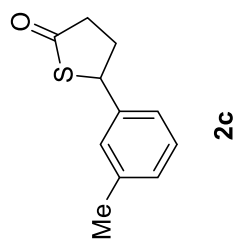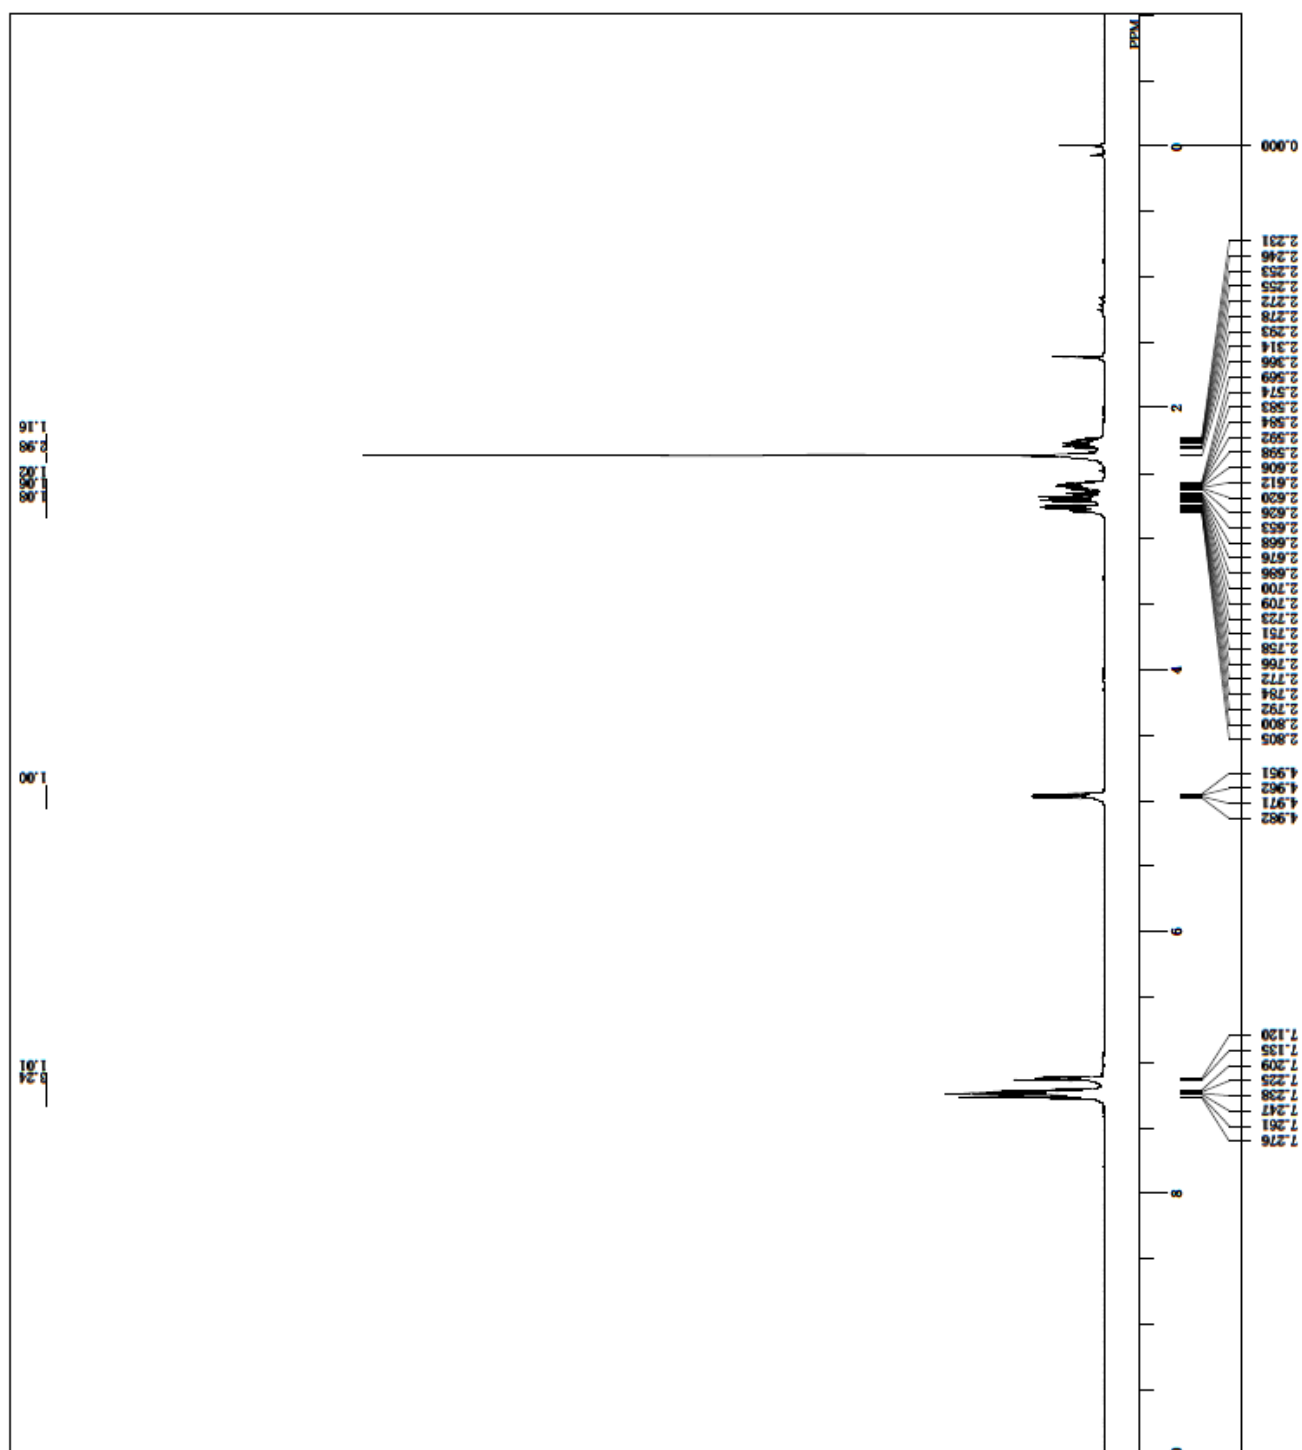

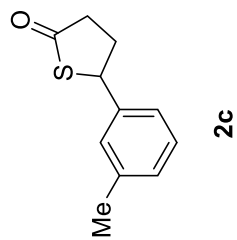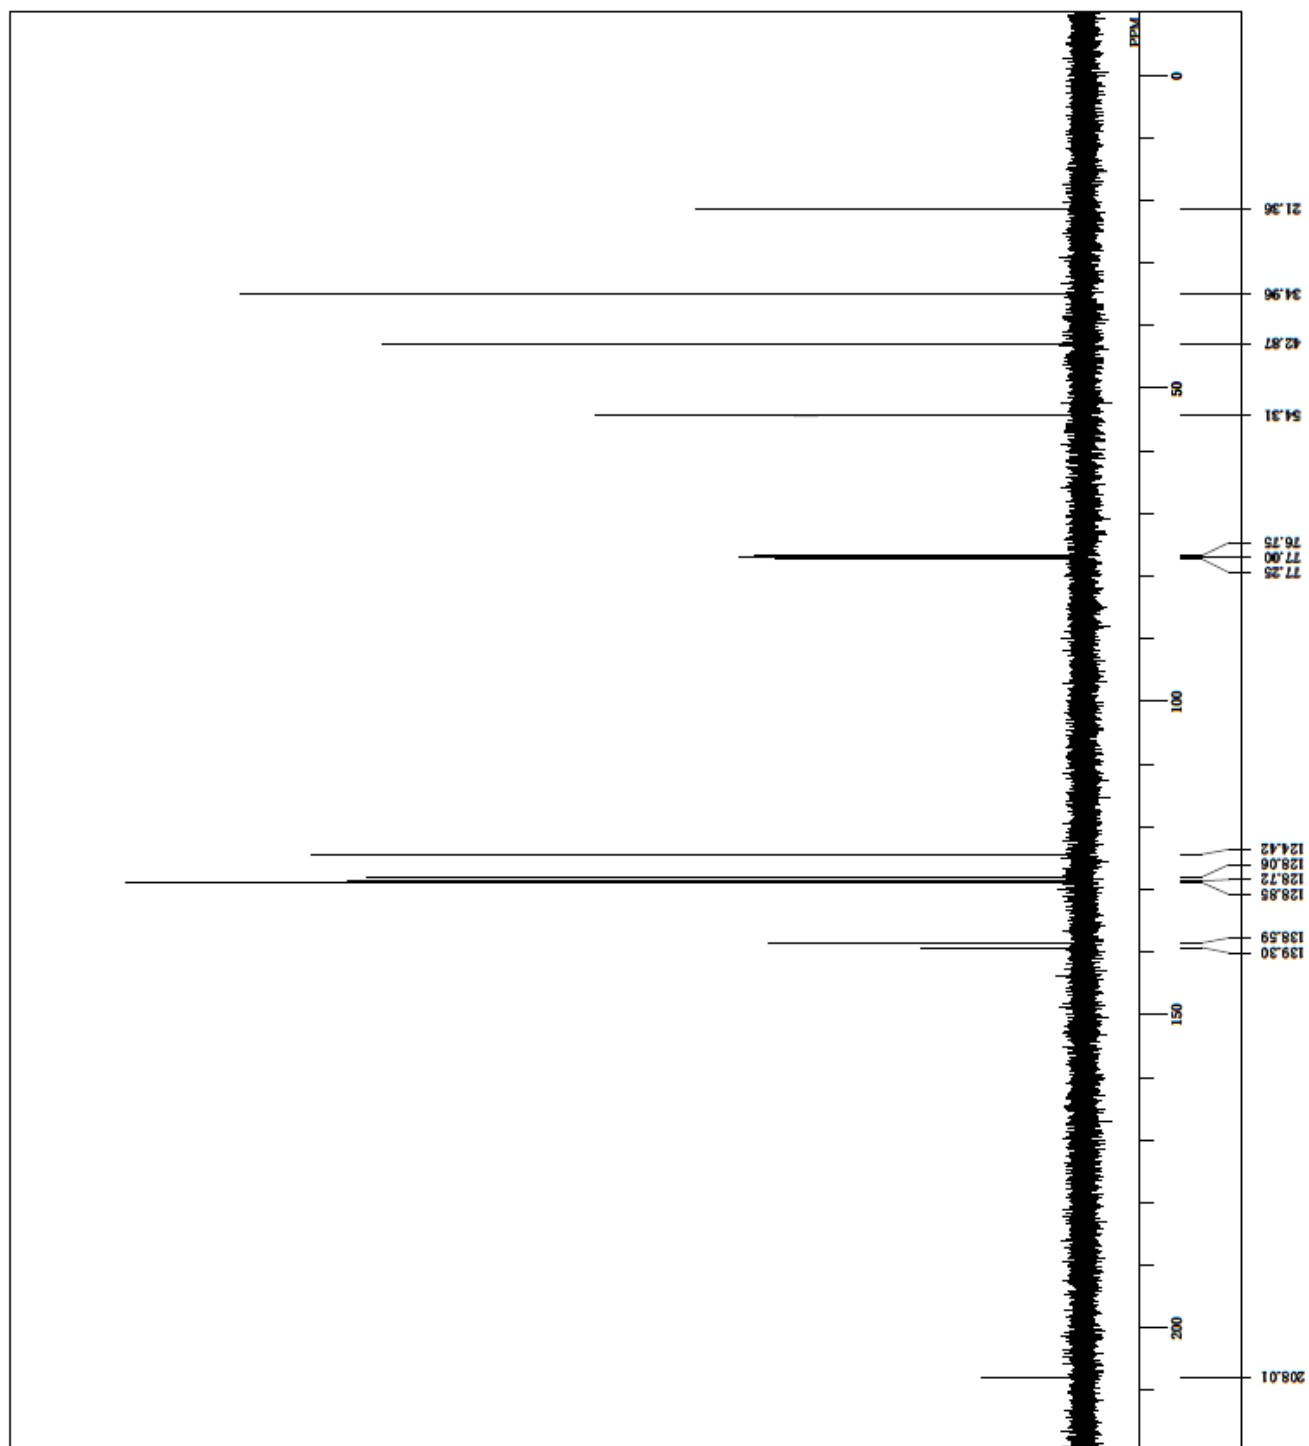

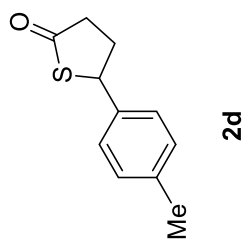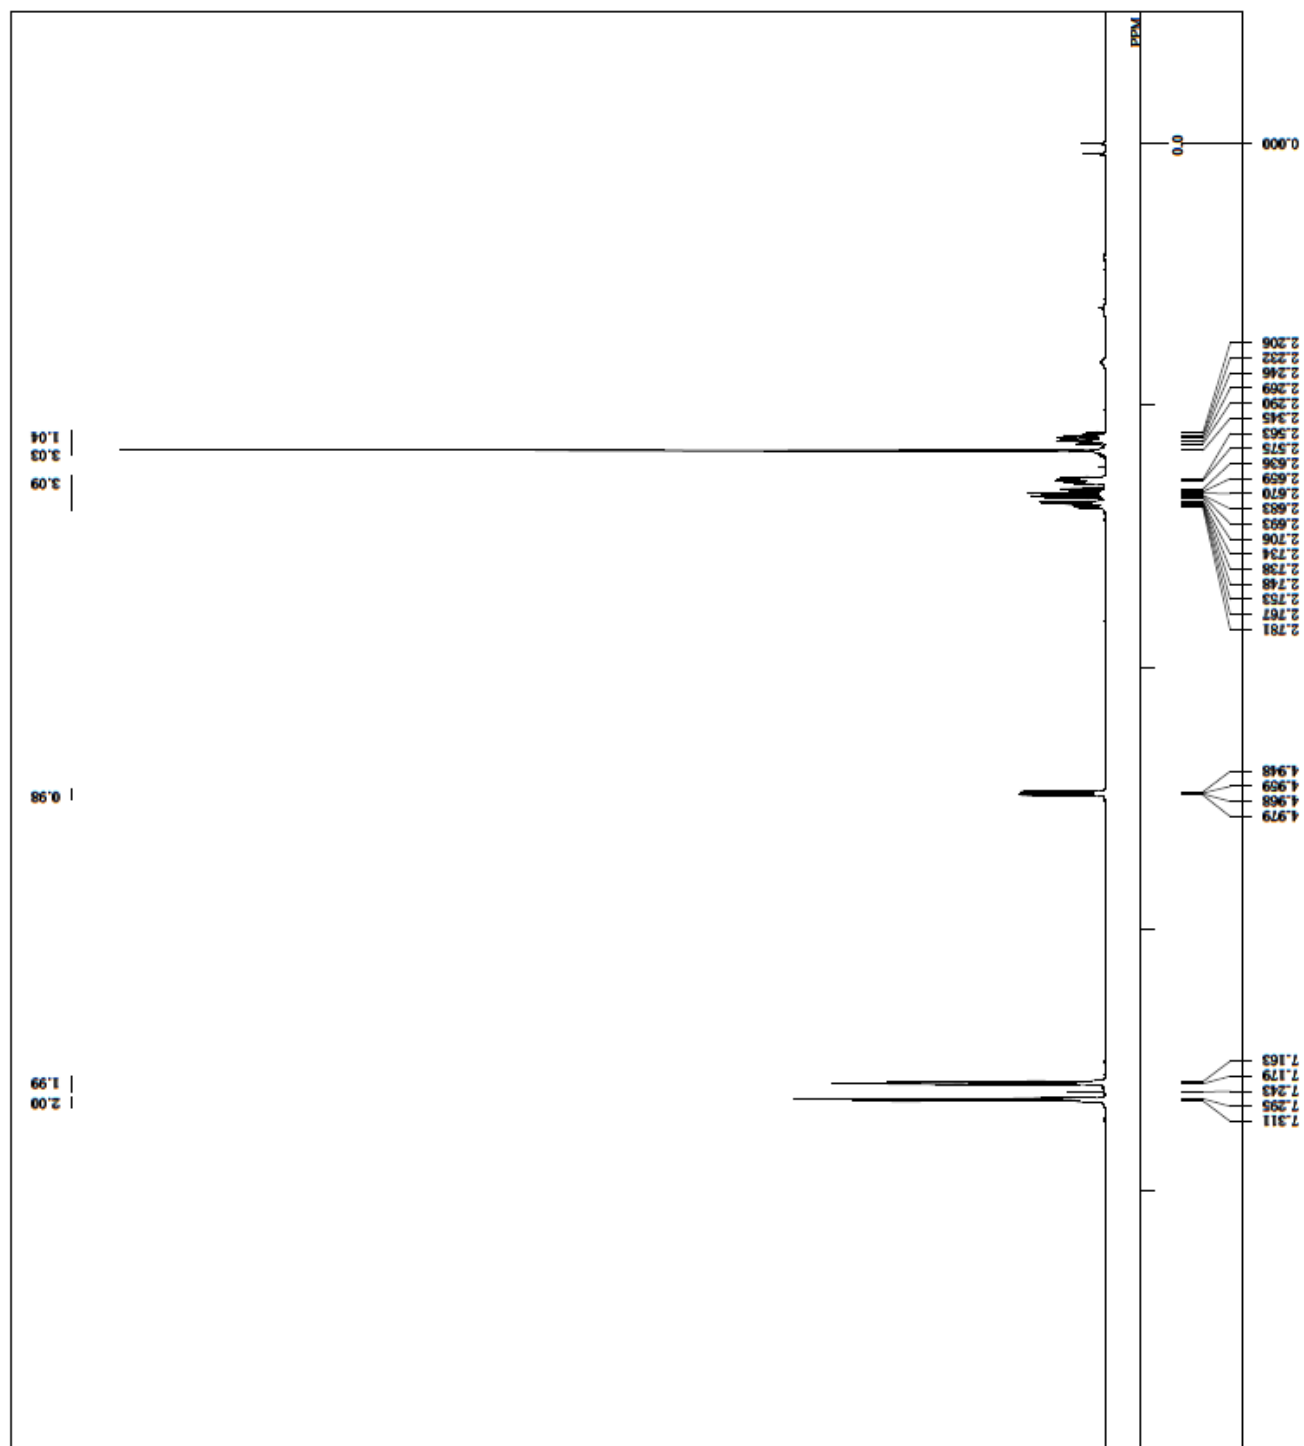

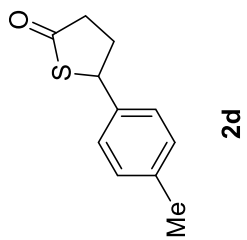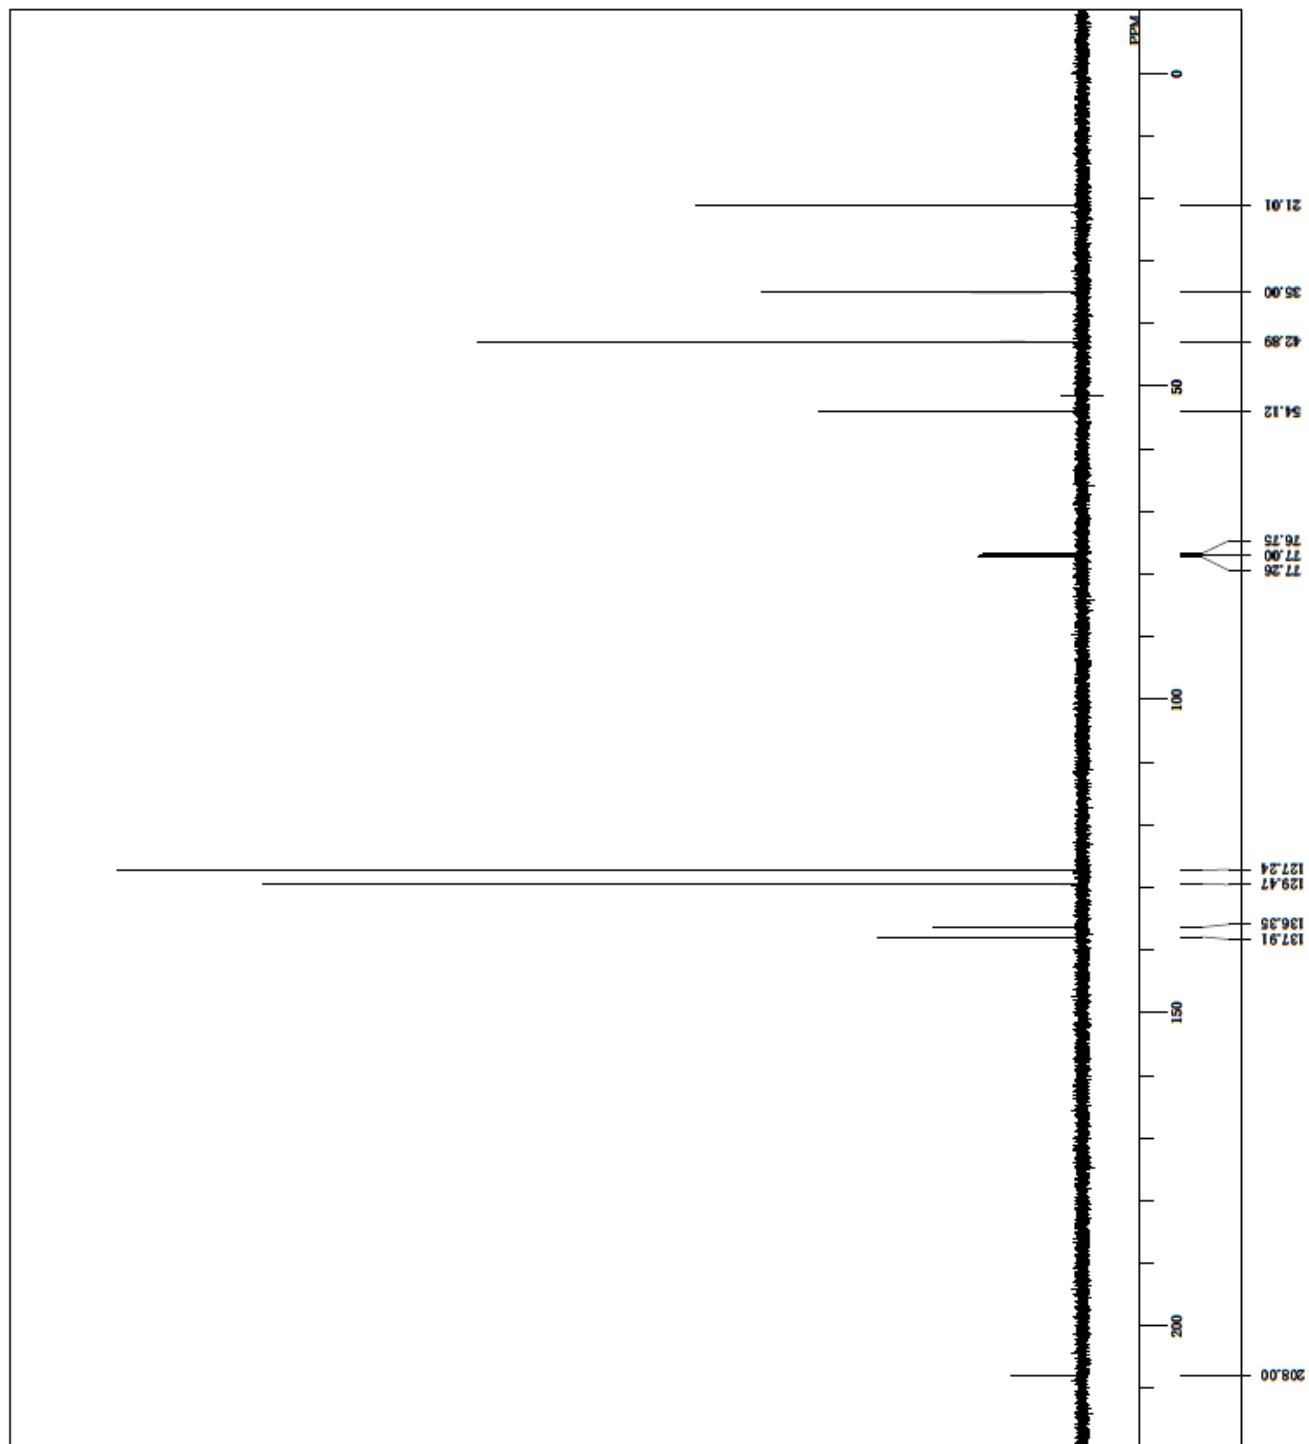

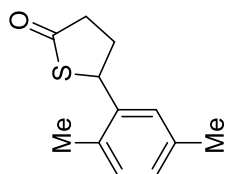

2e

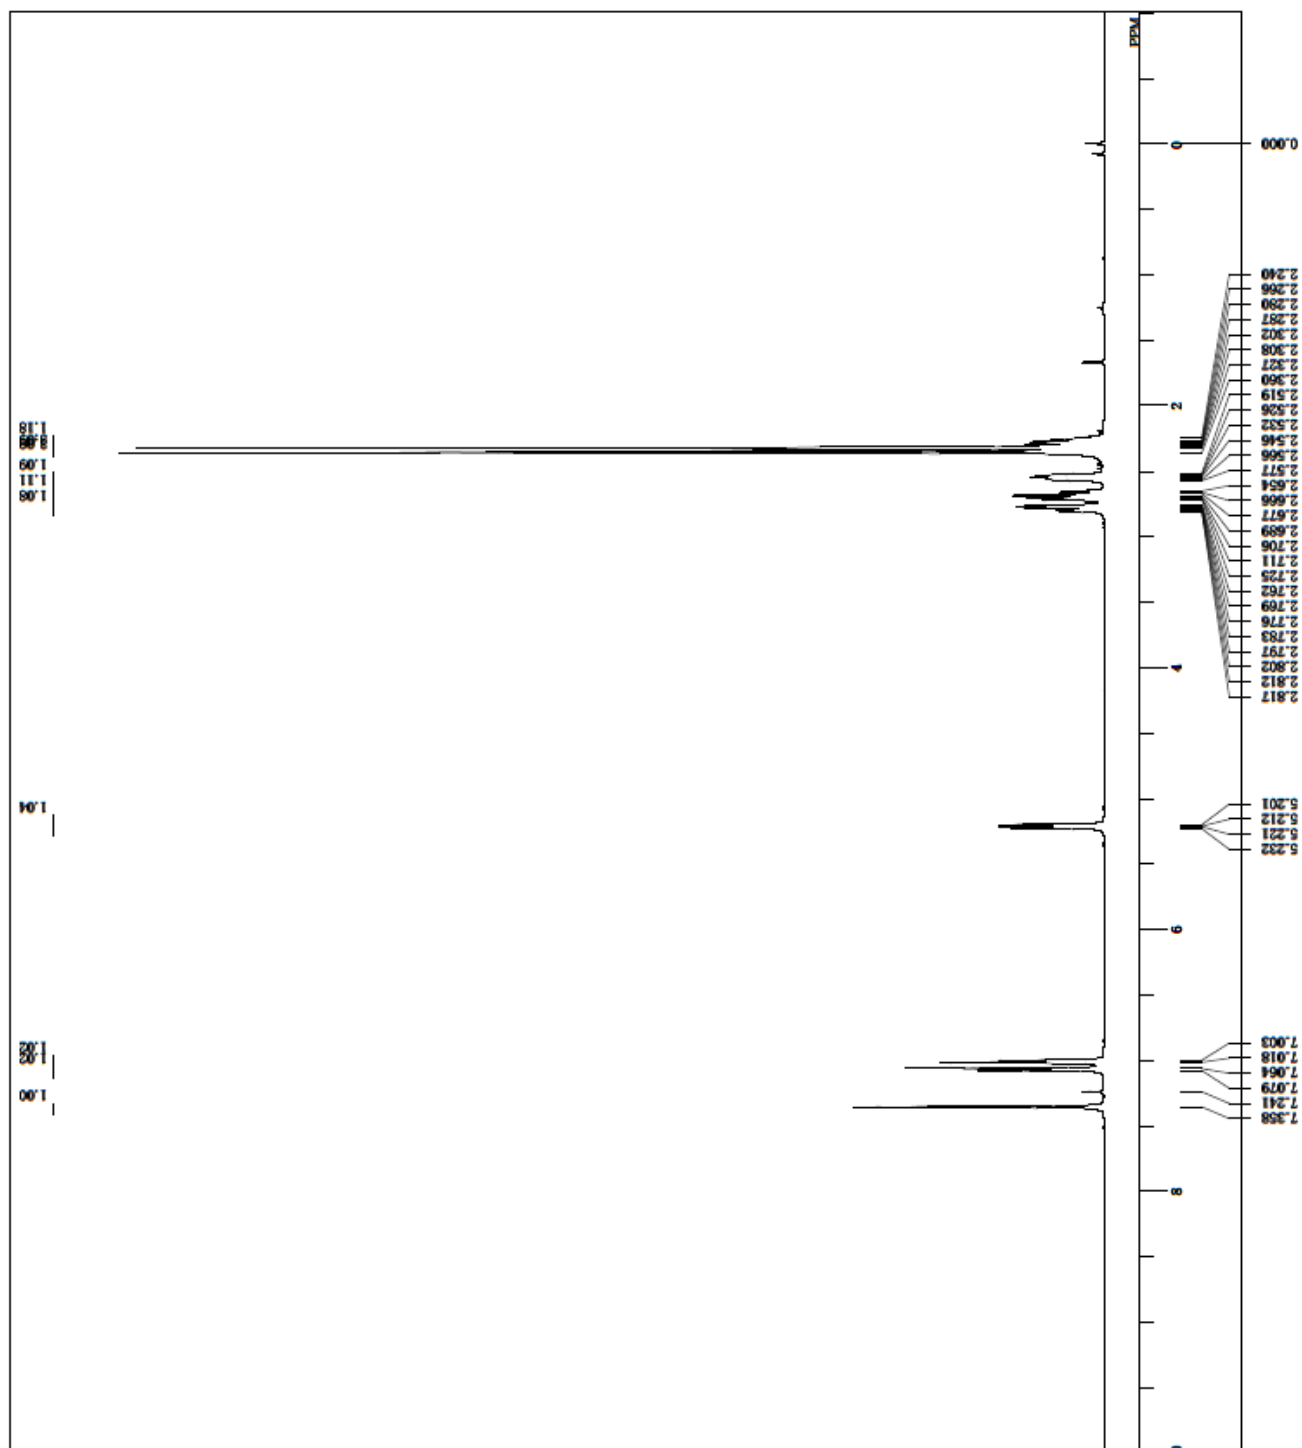

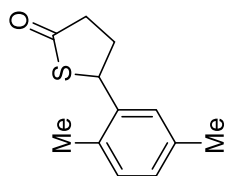

2e

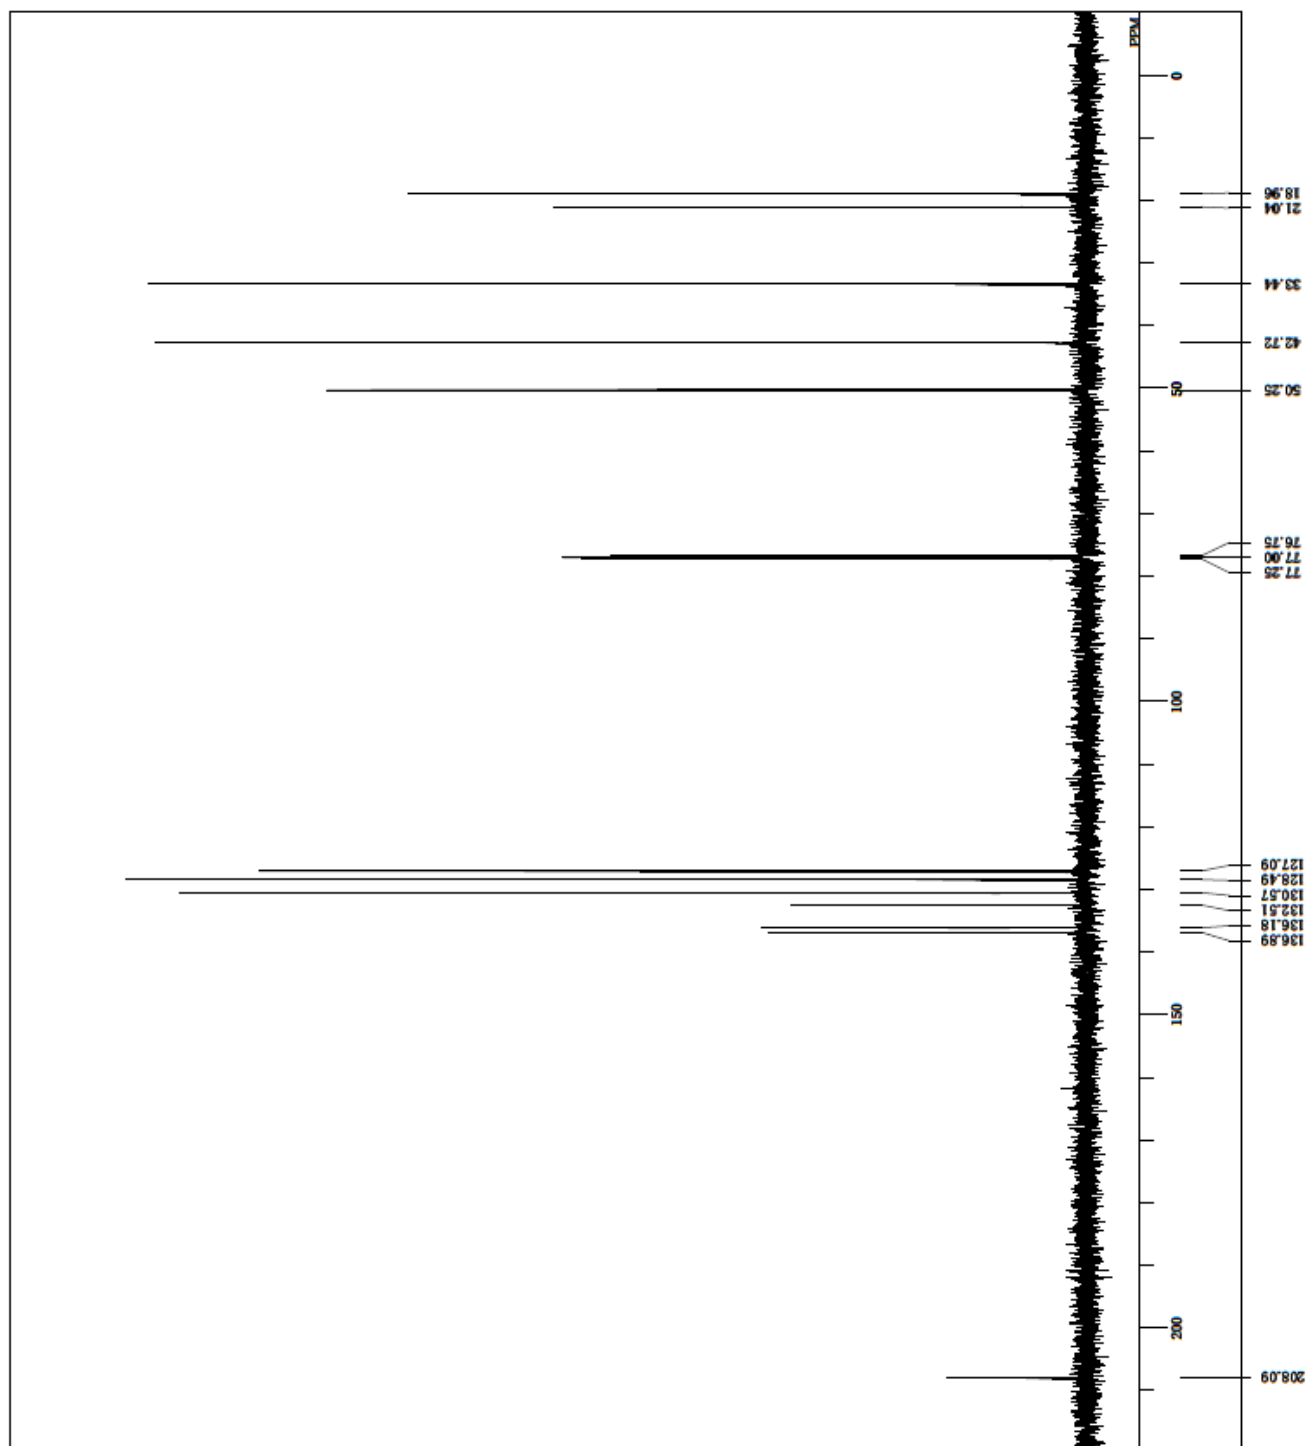

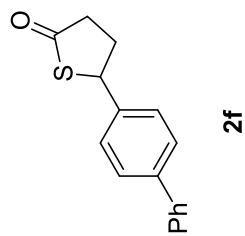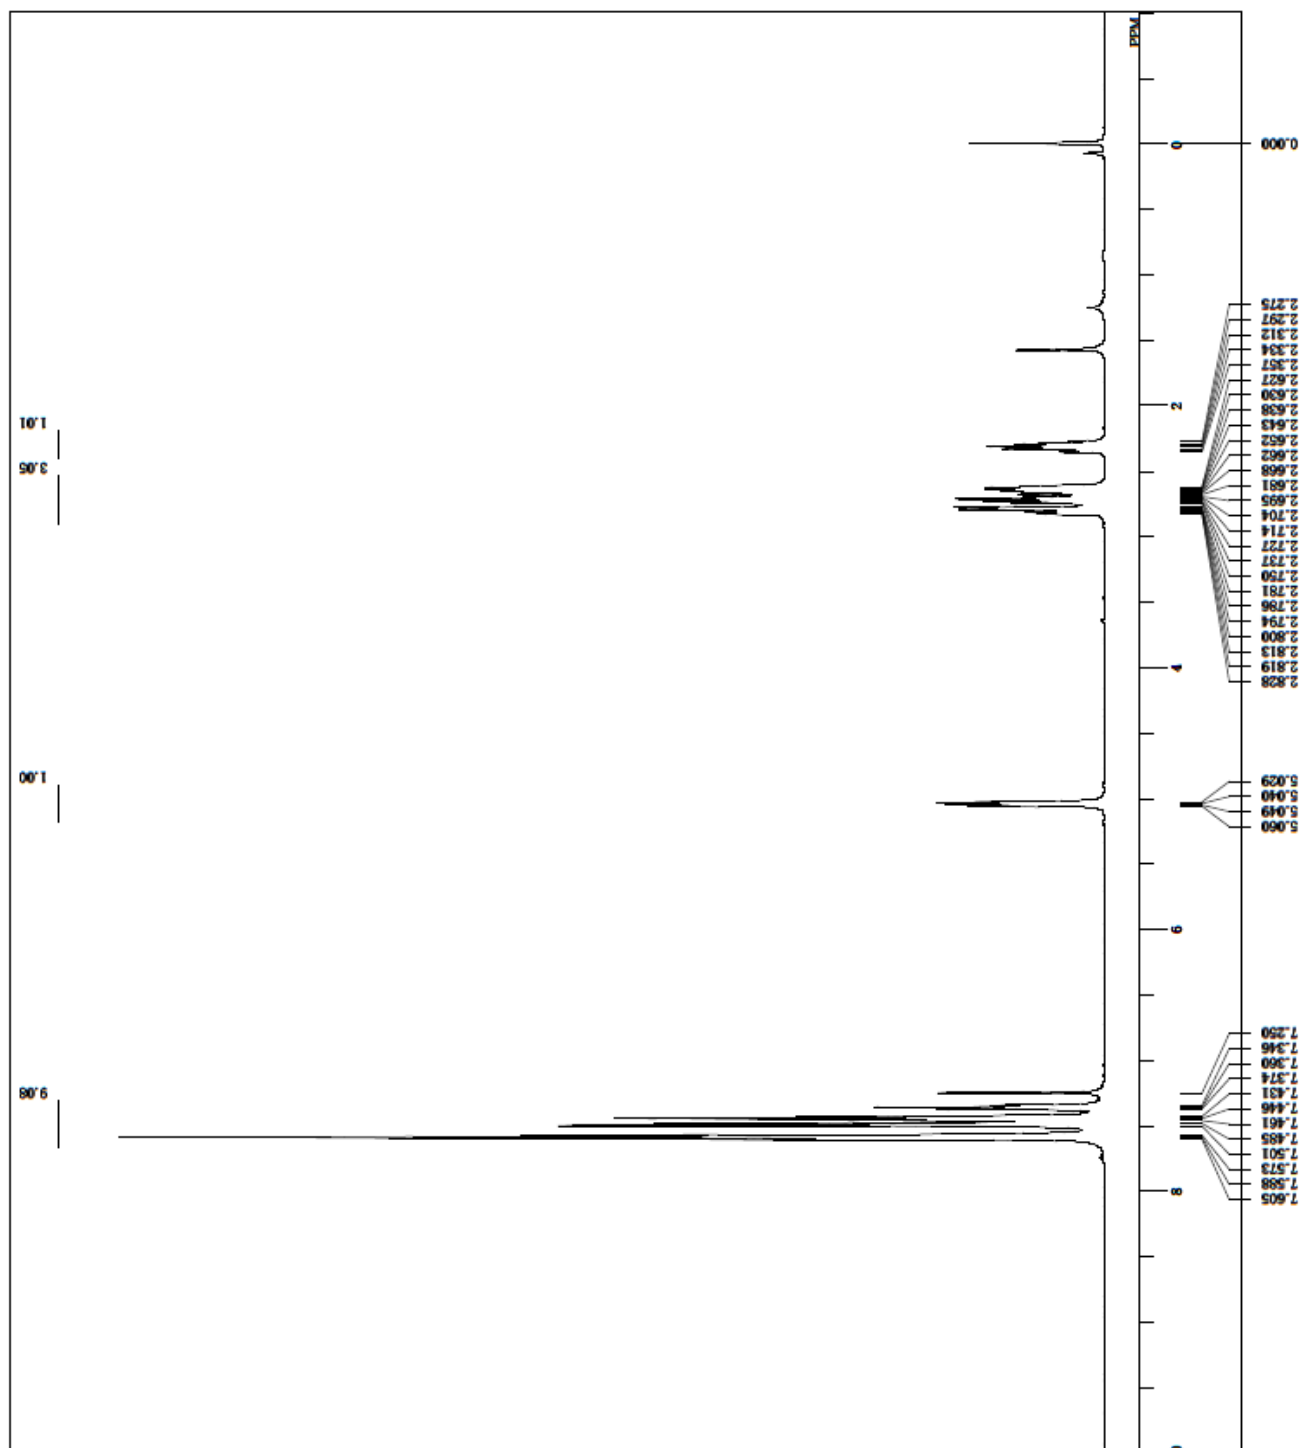

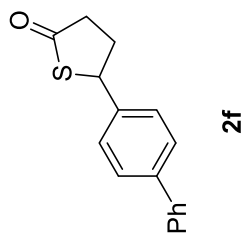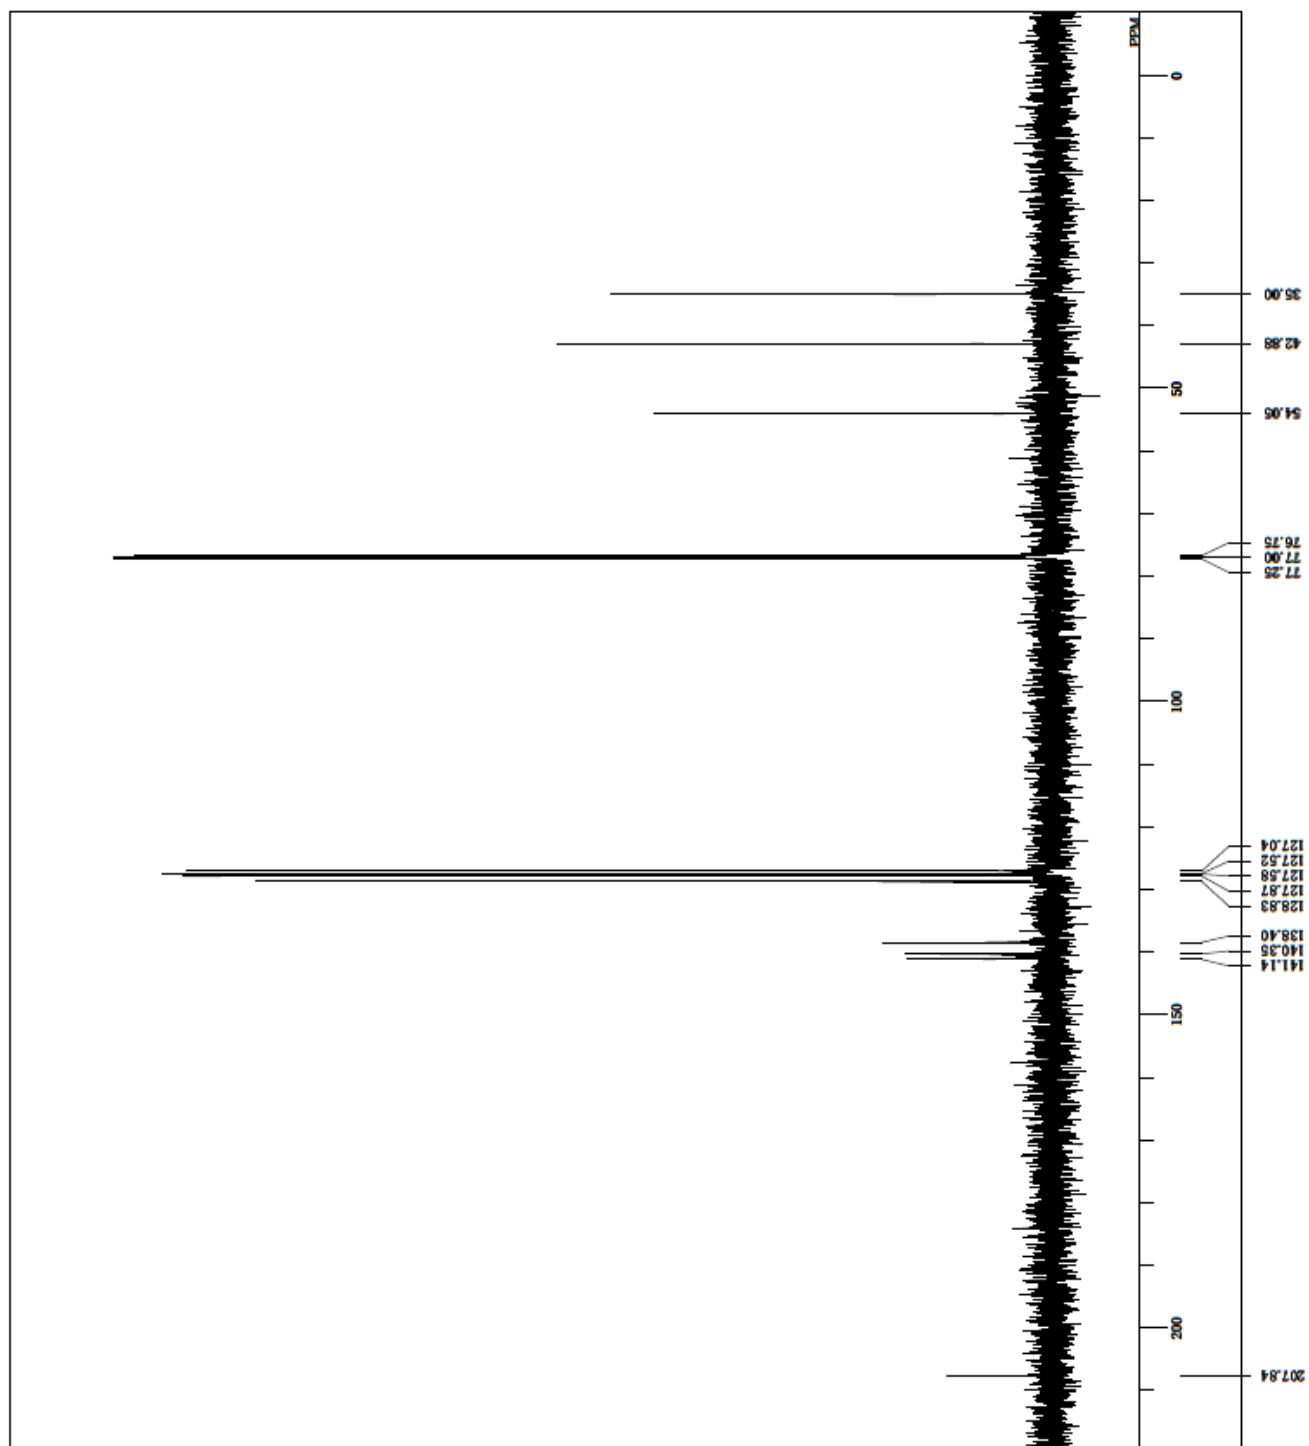

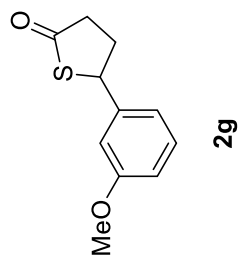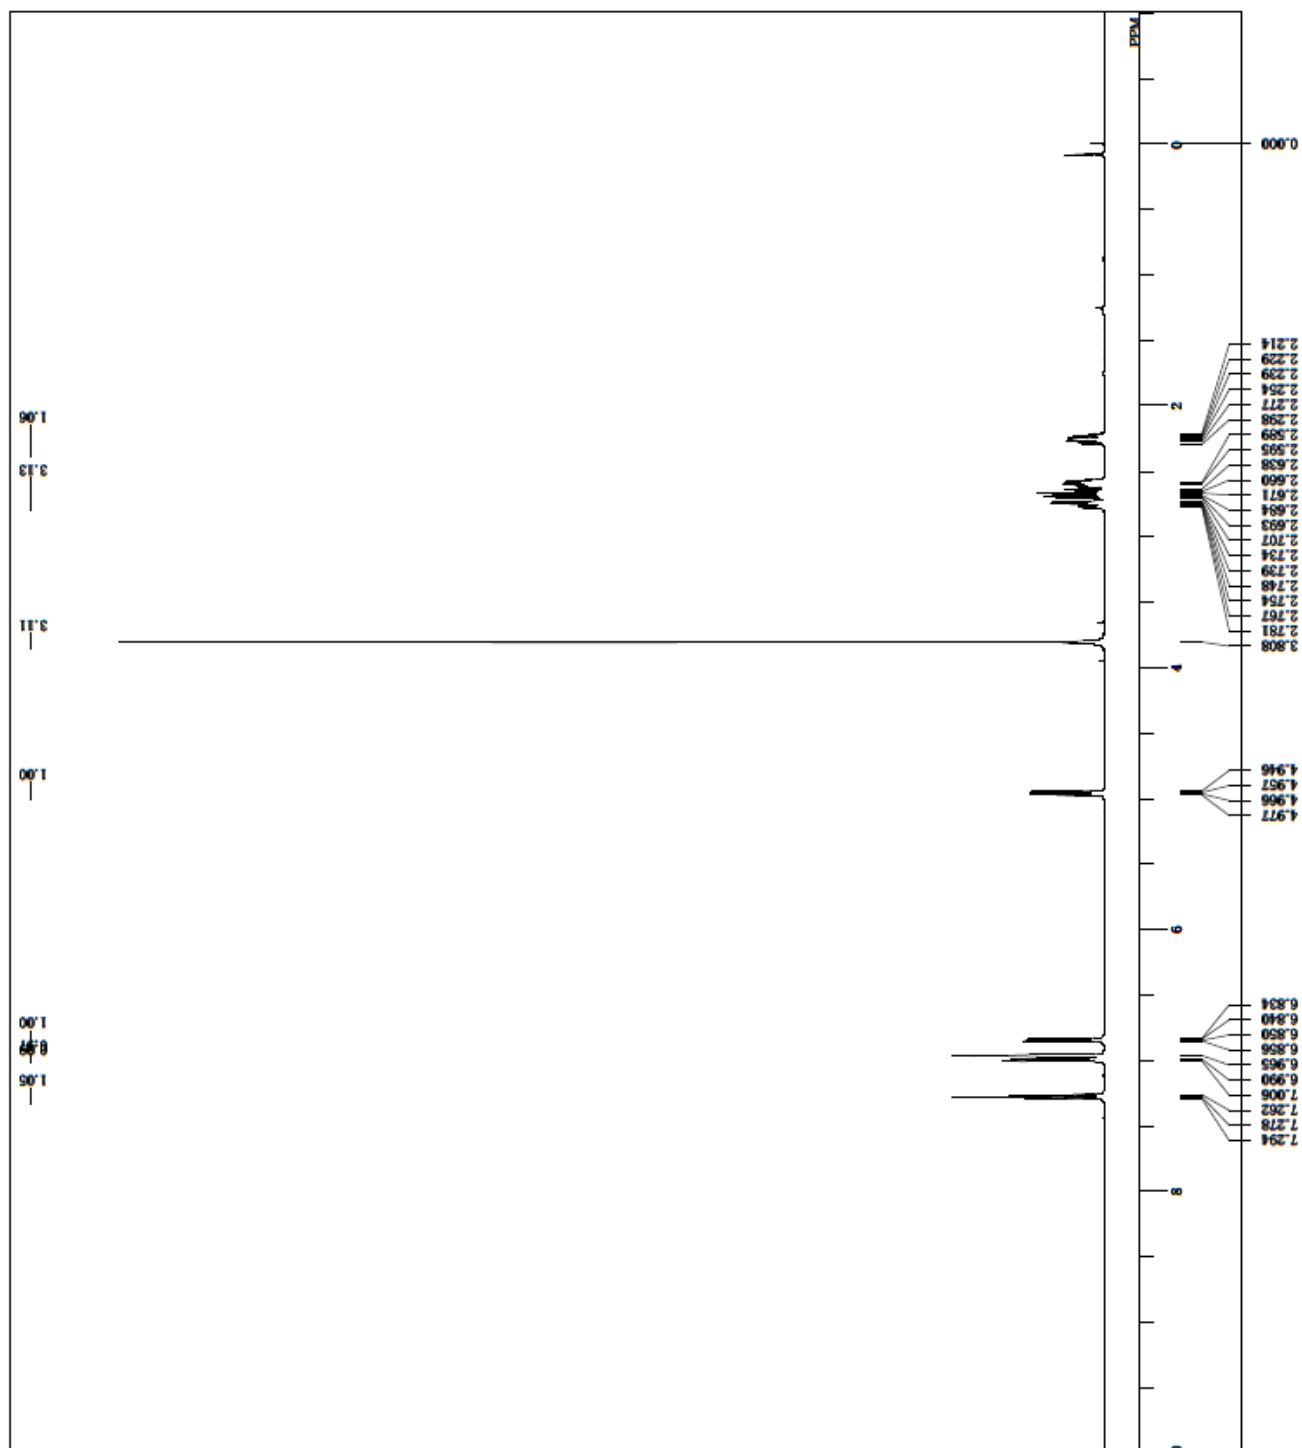

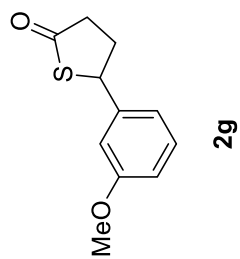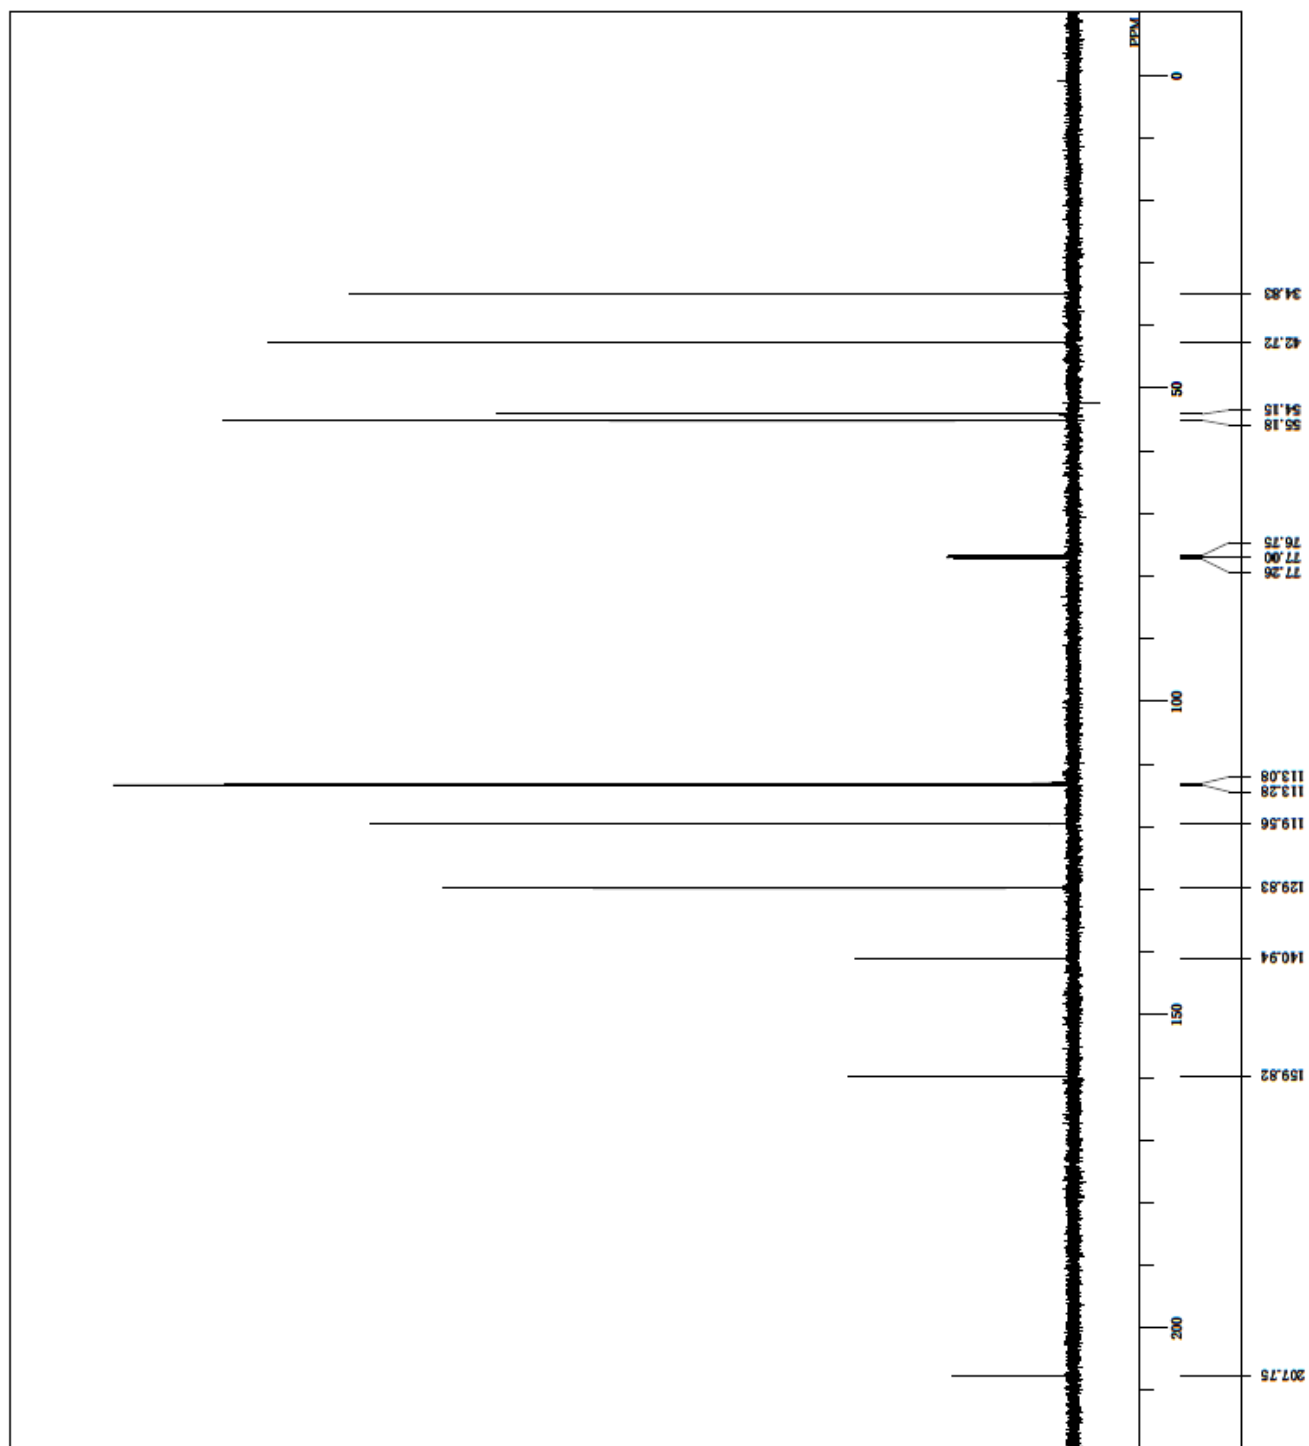

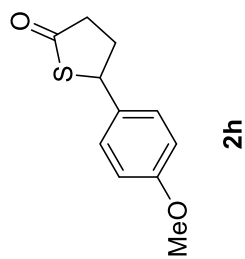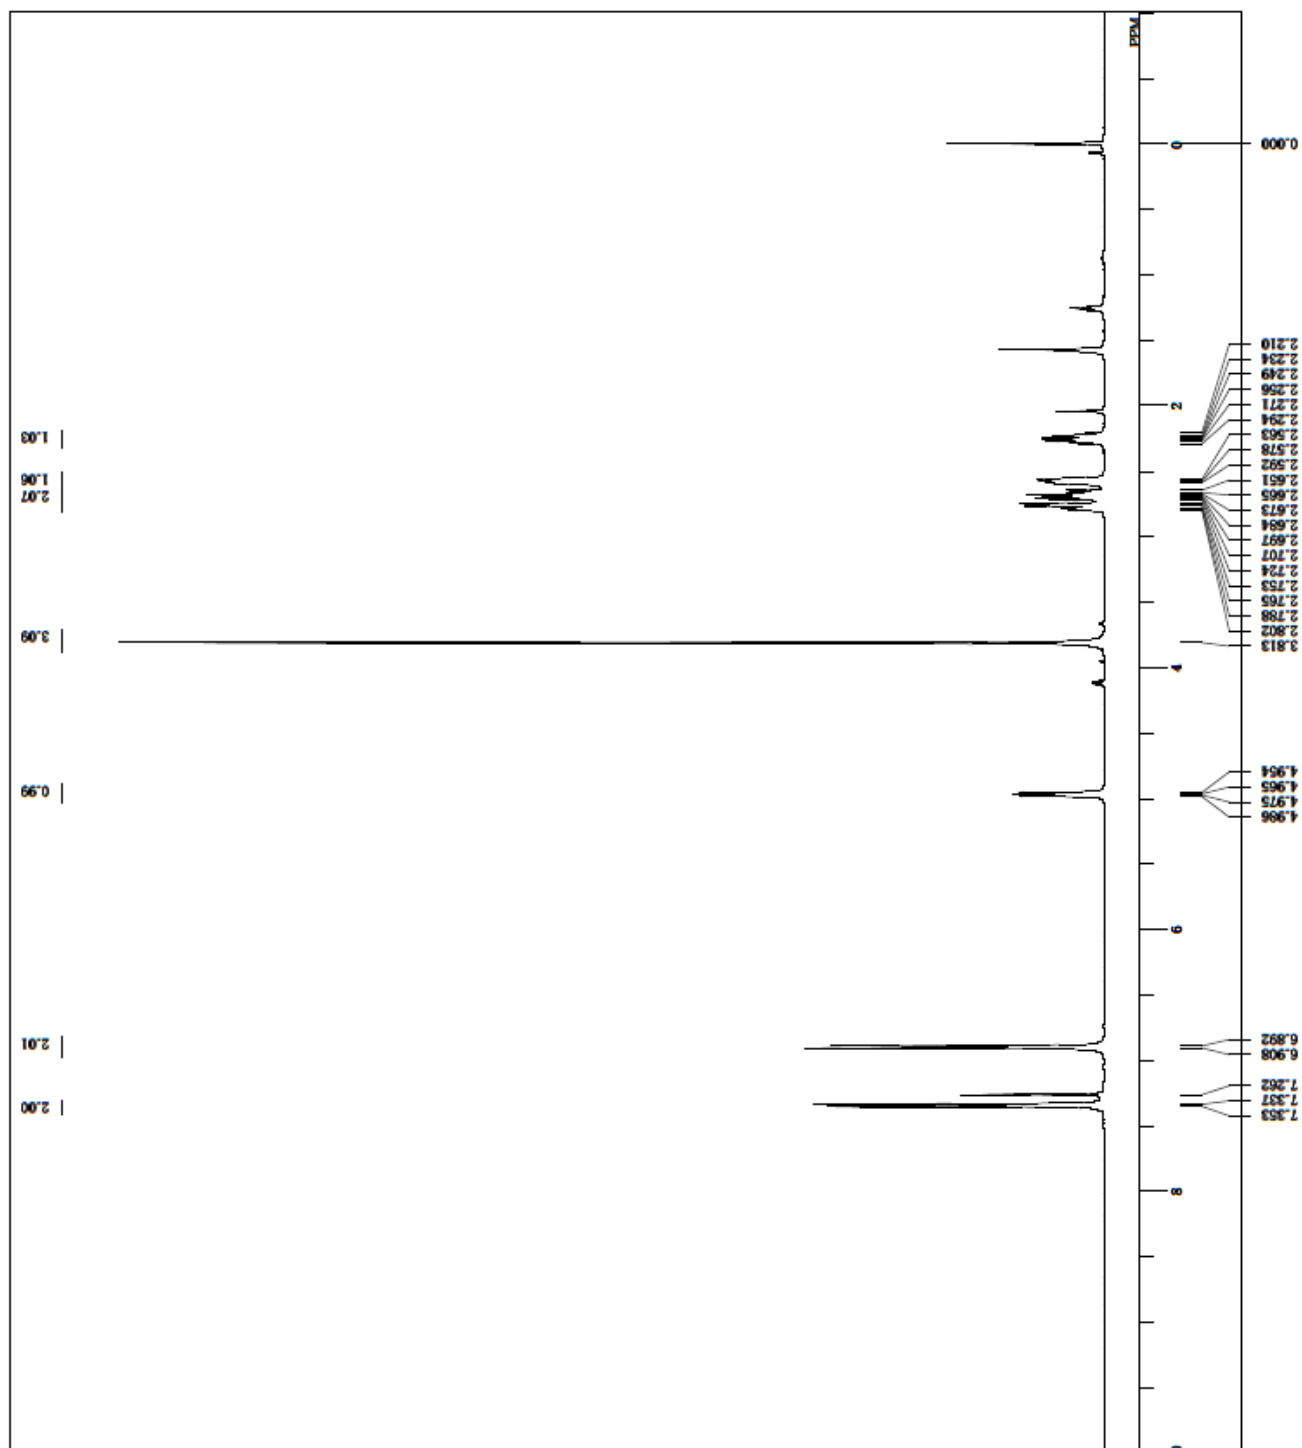

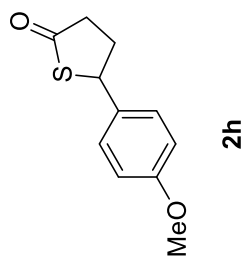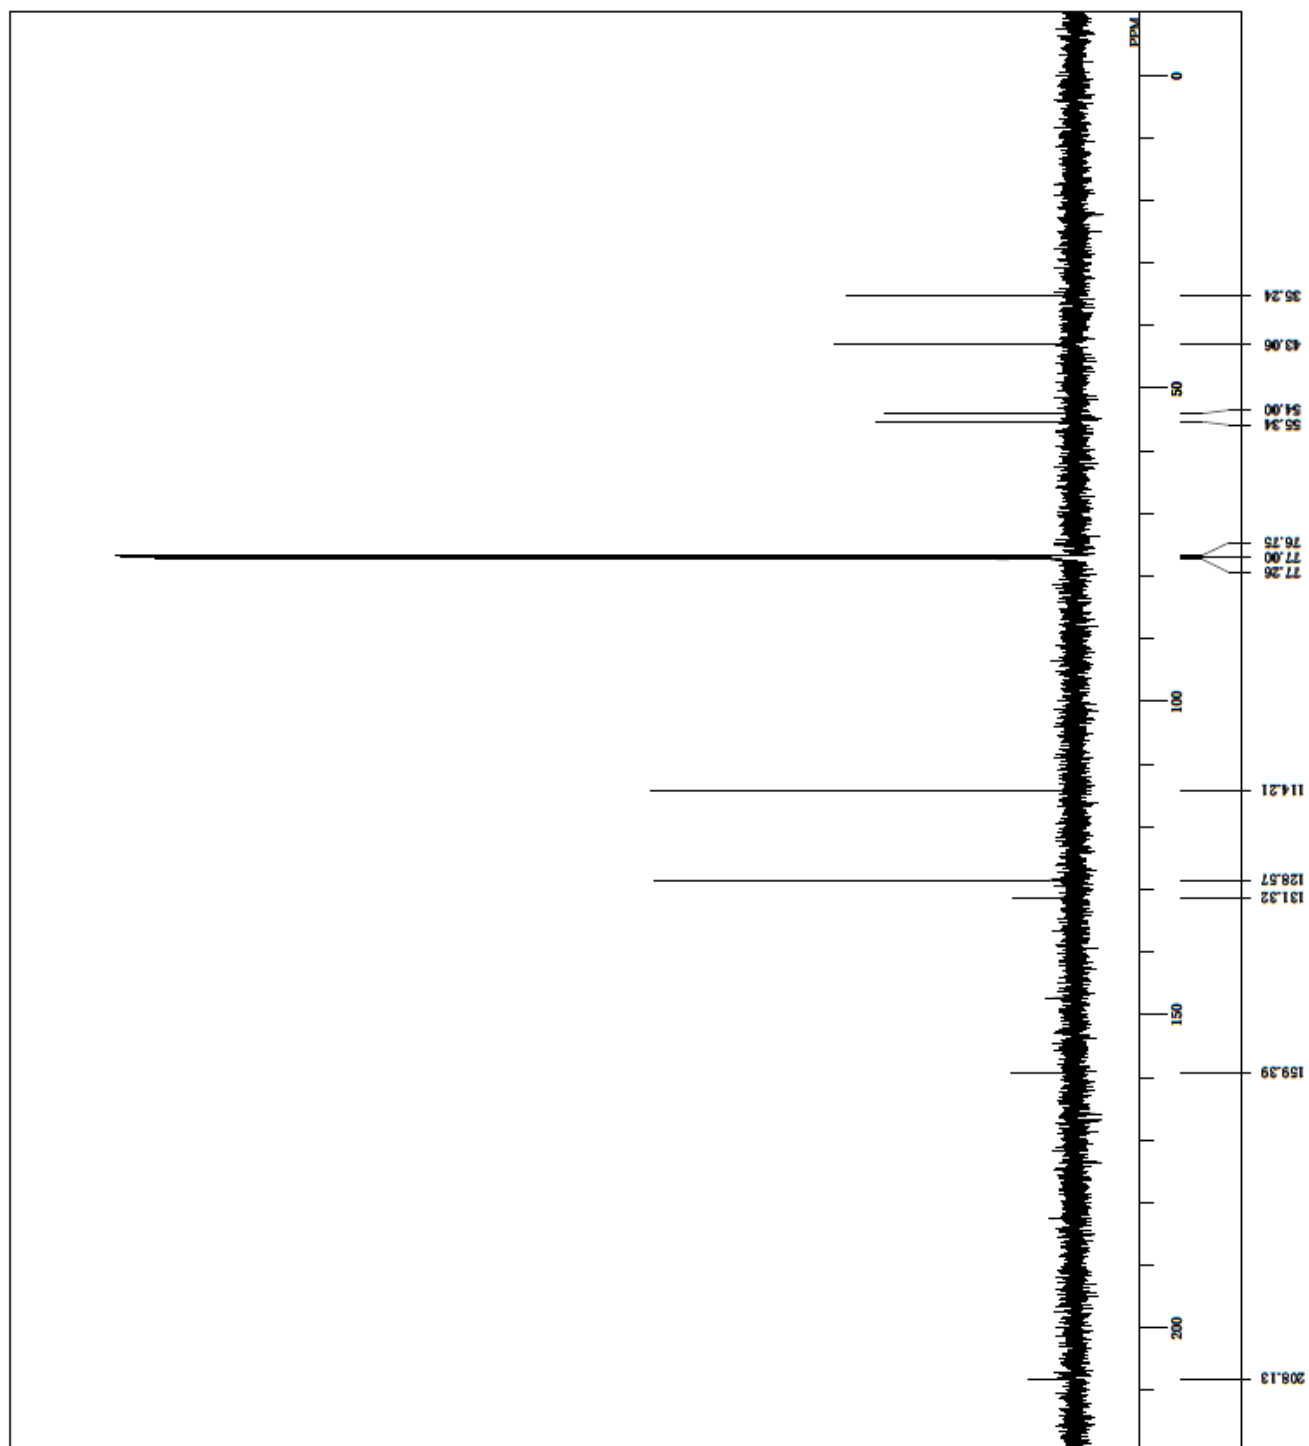

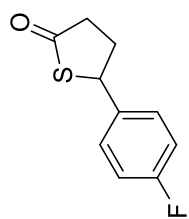

2i

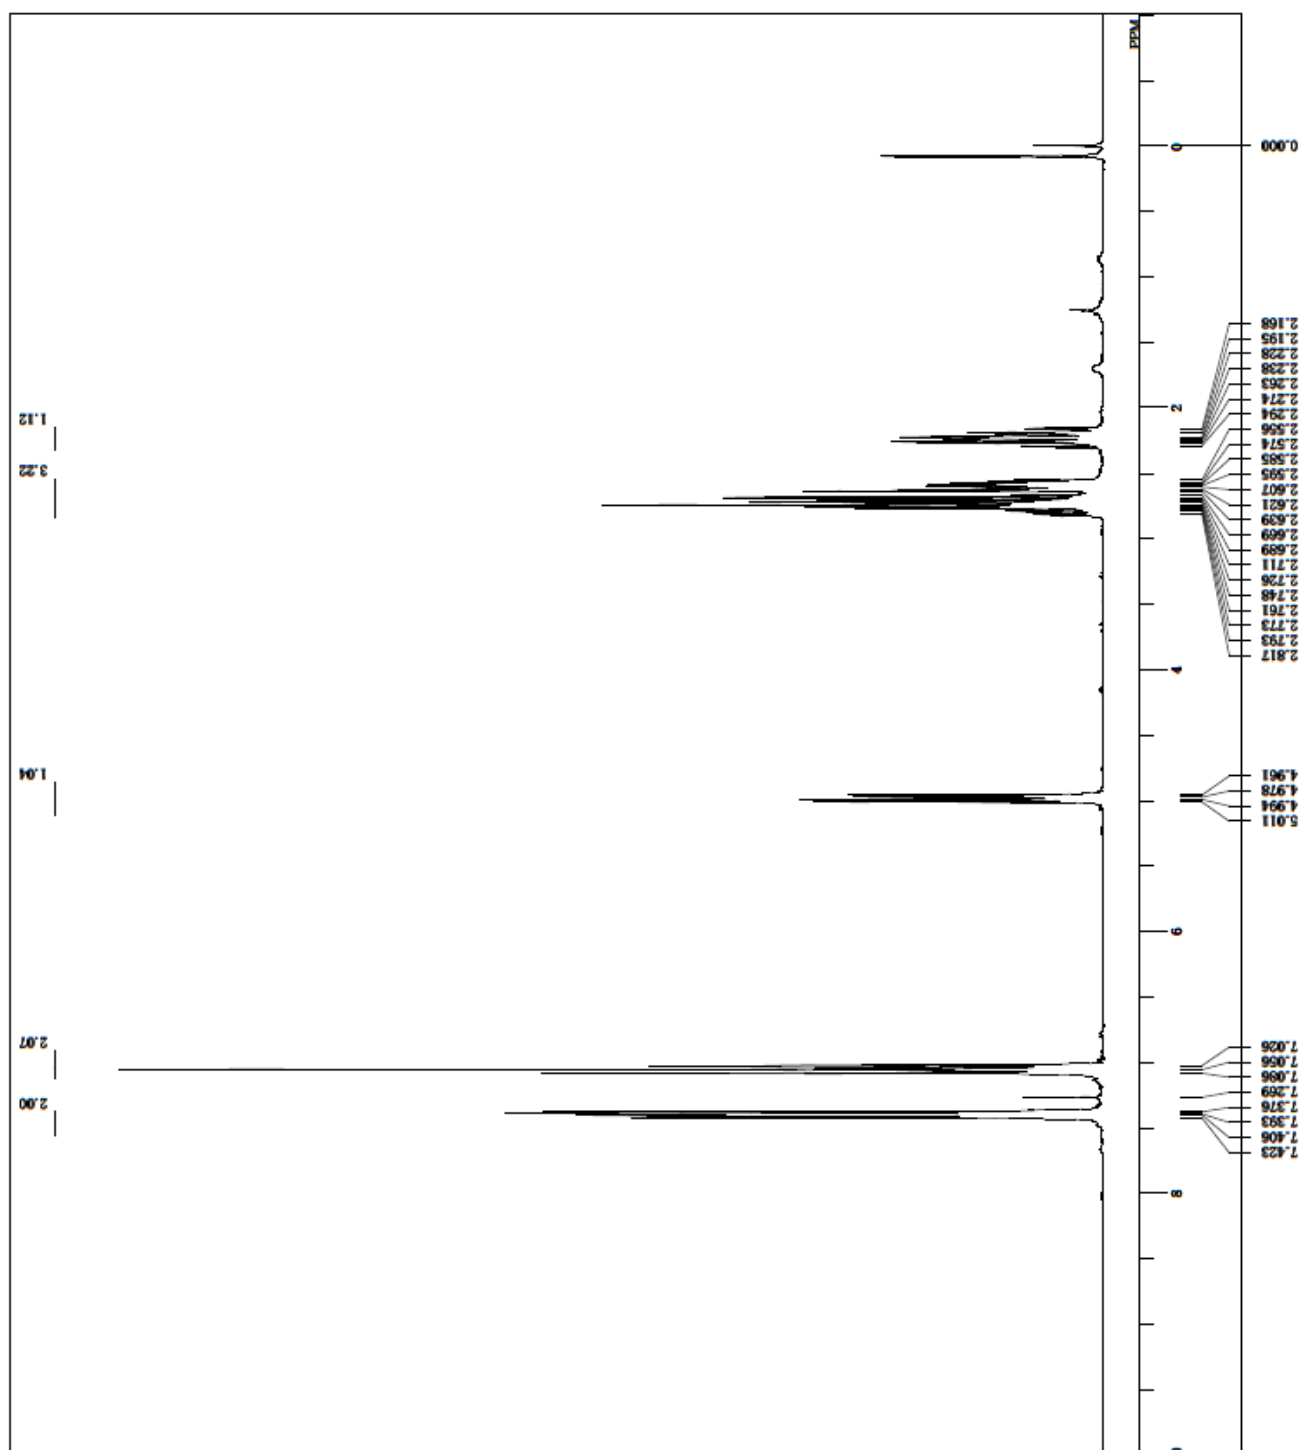

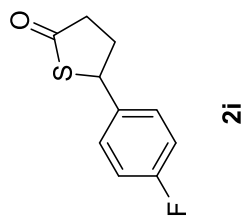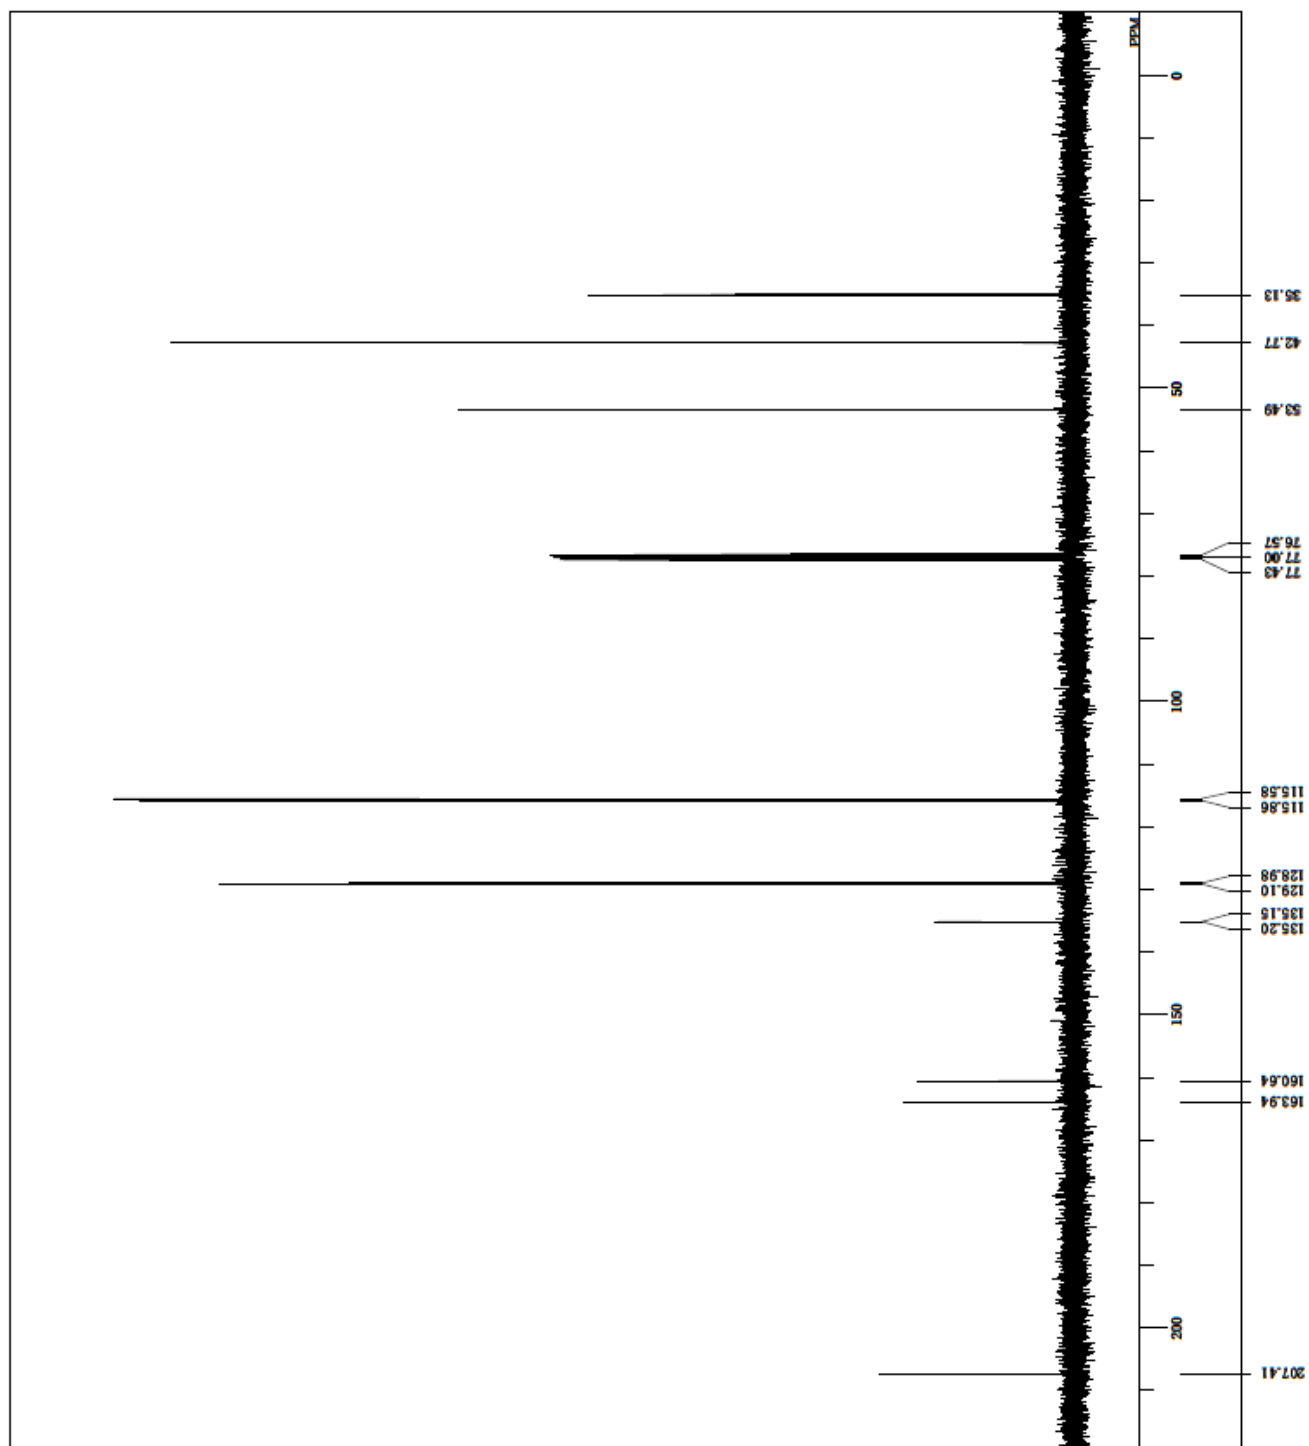

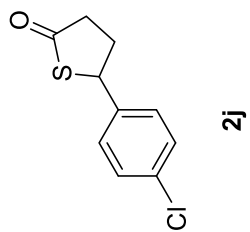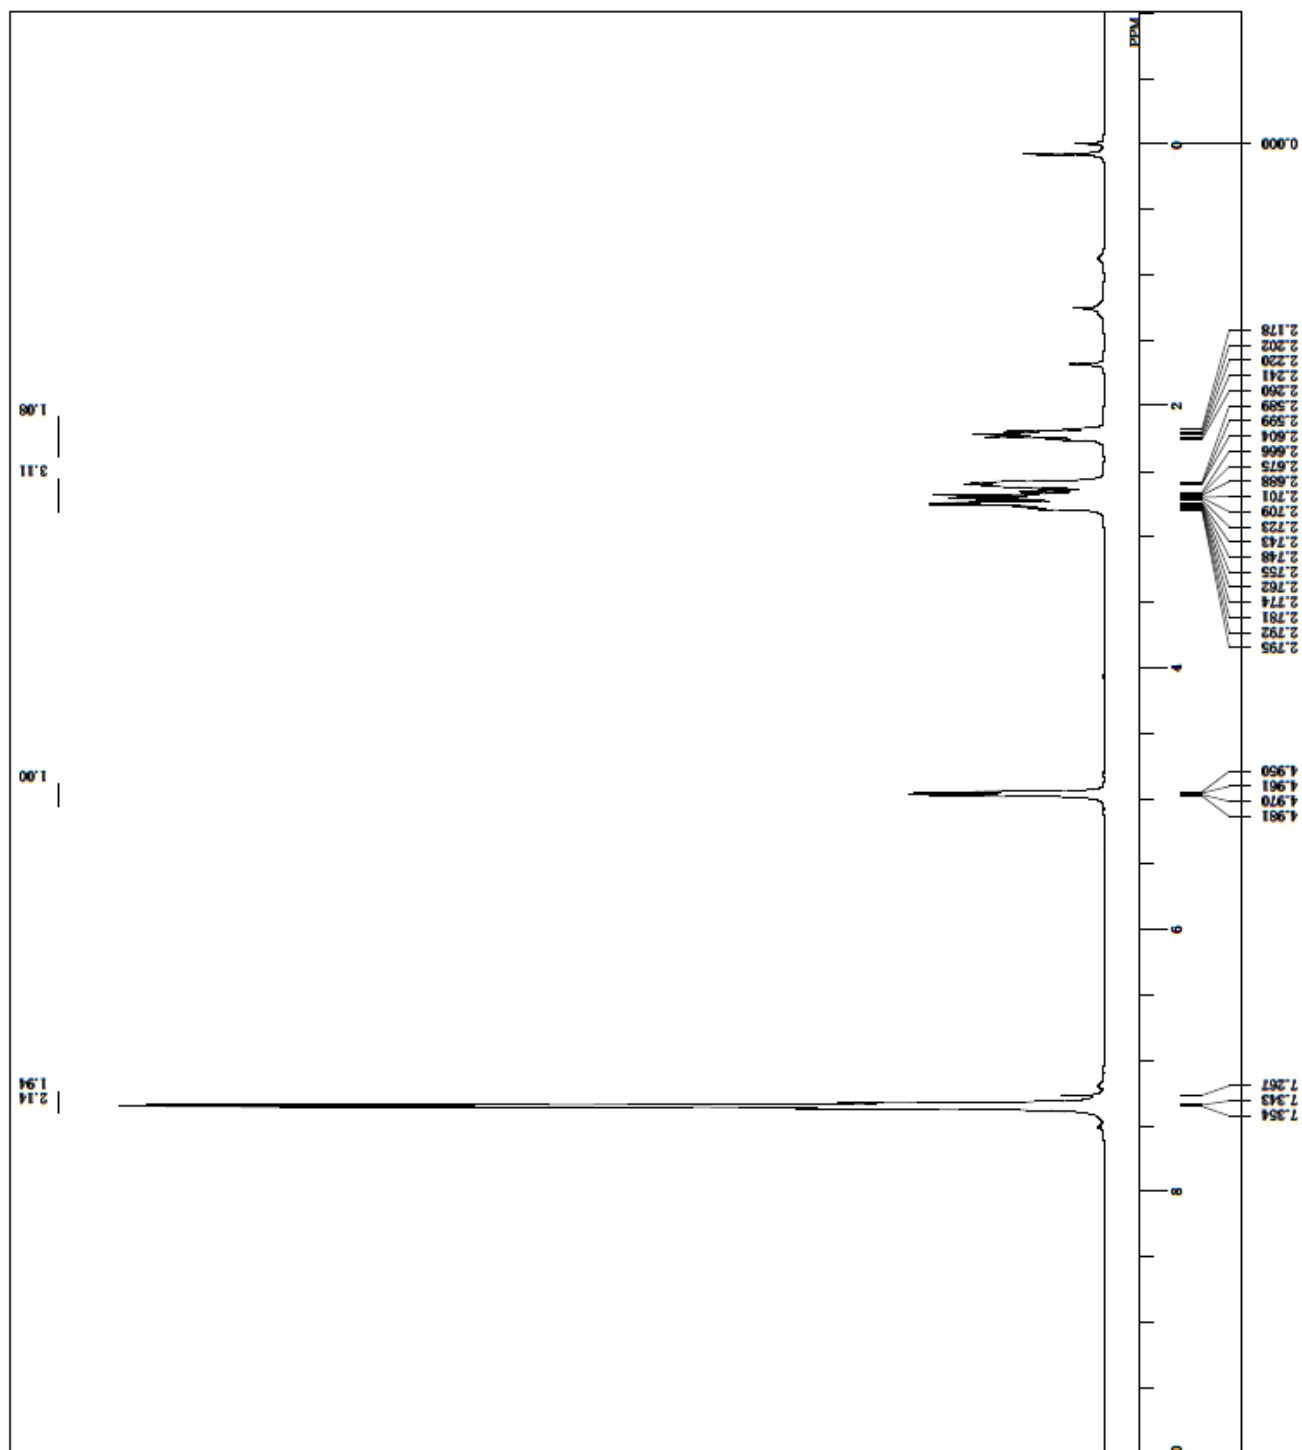

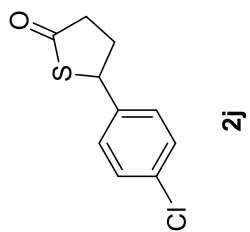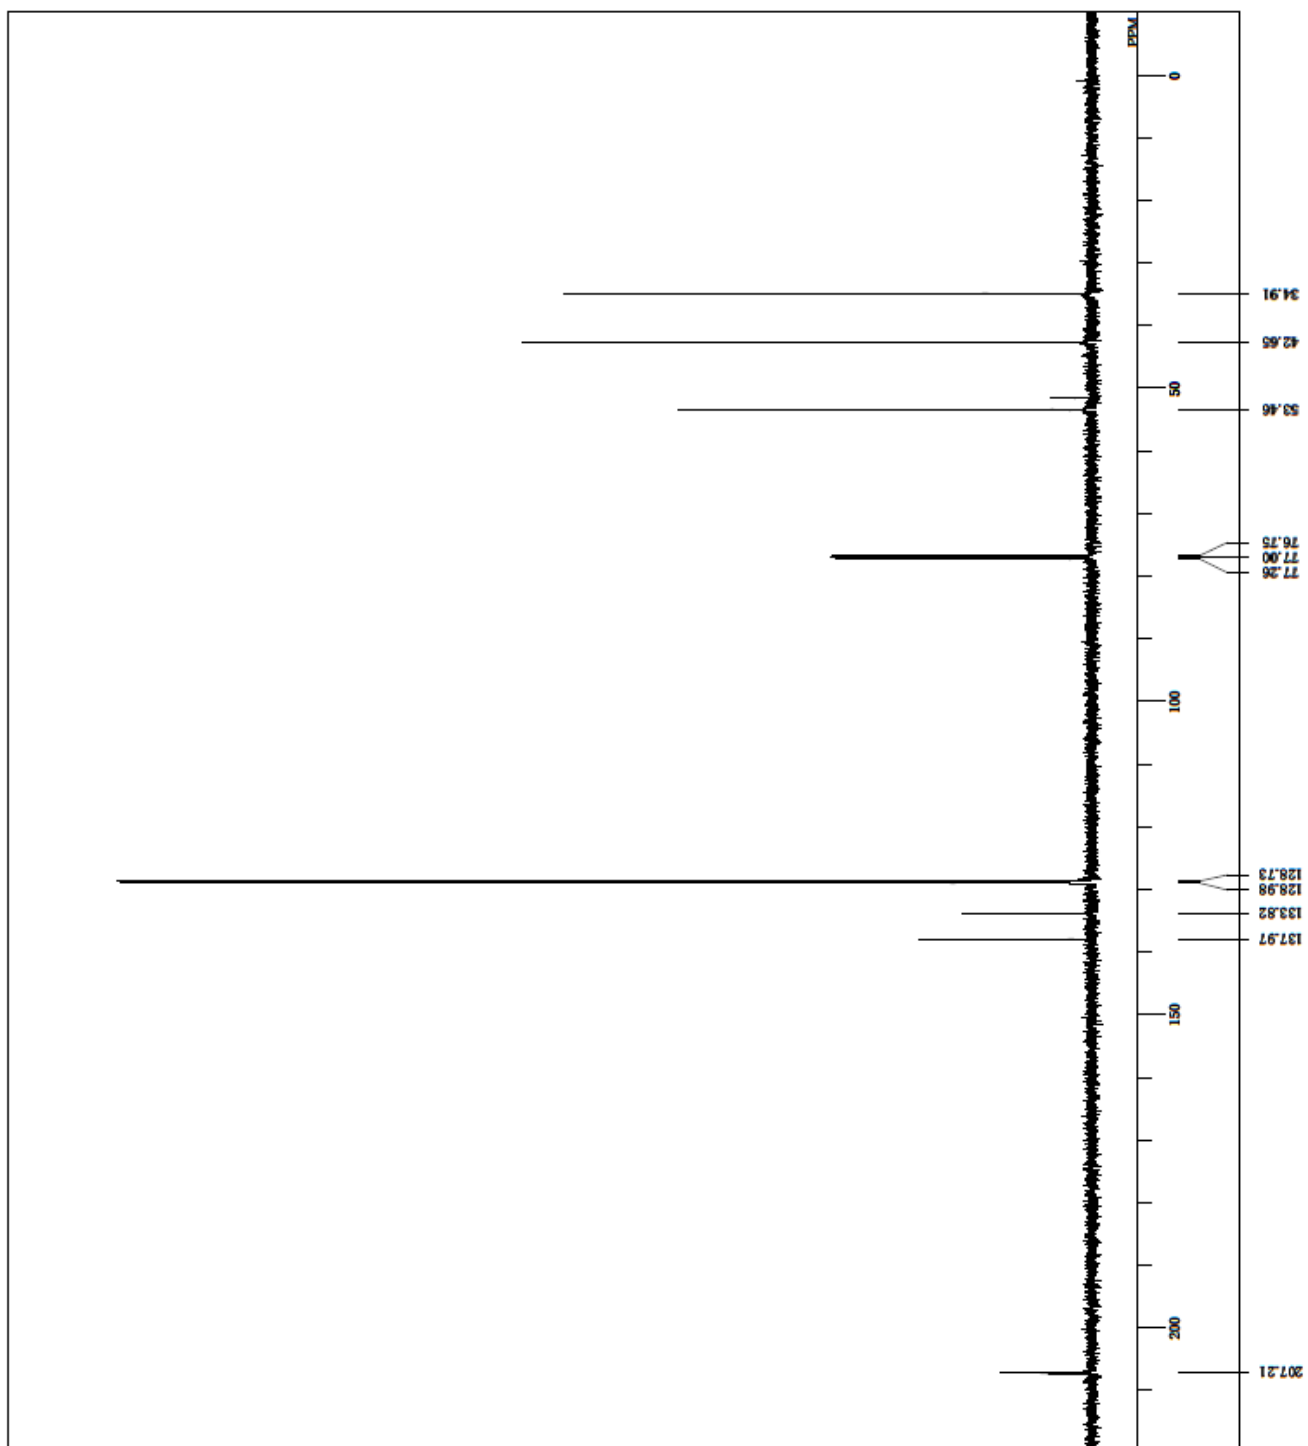

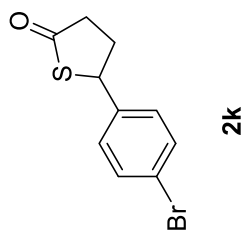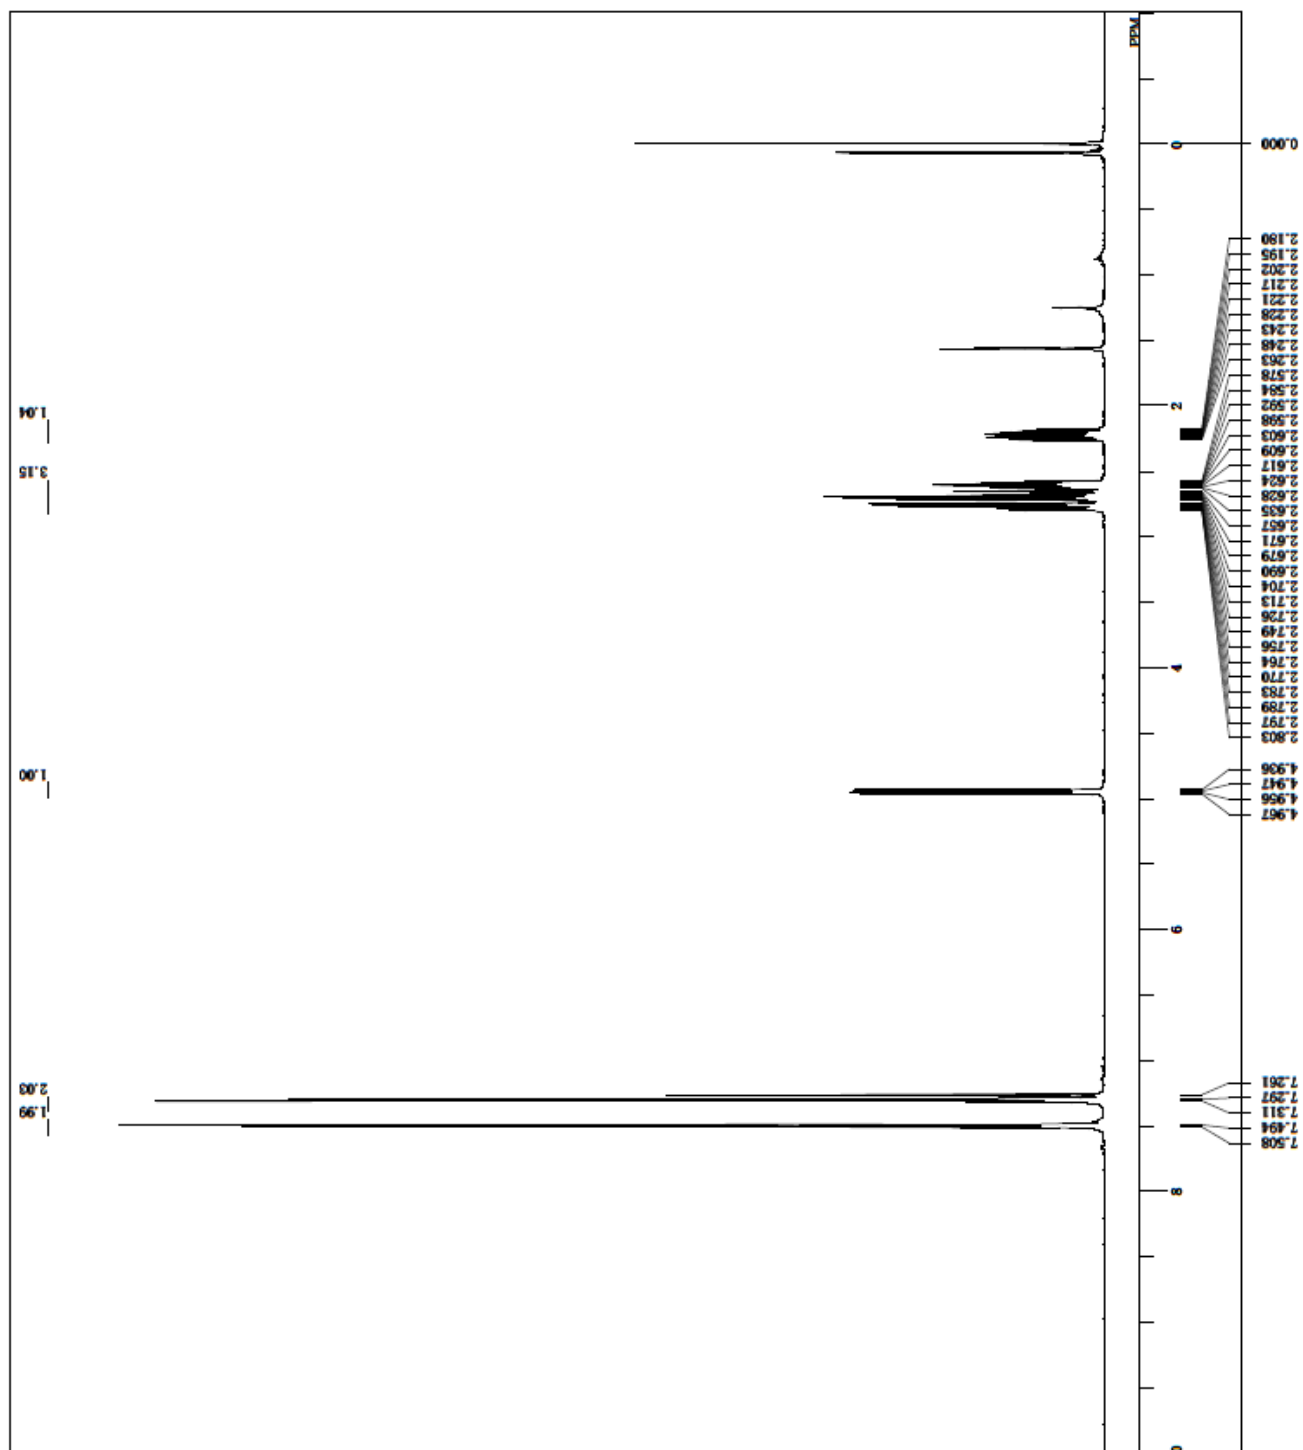

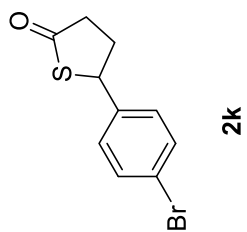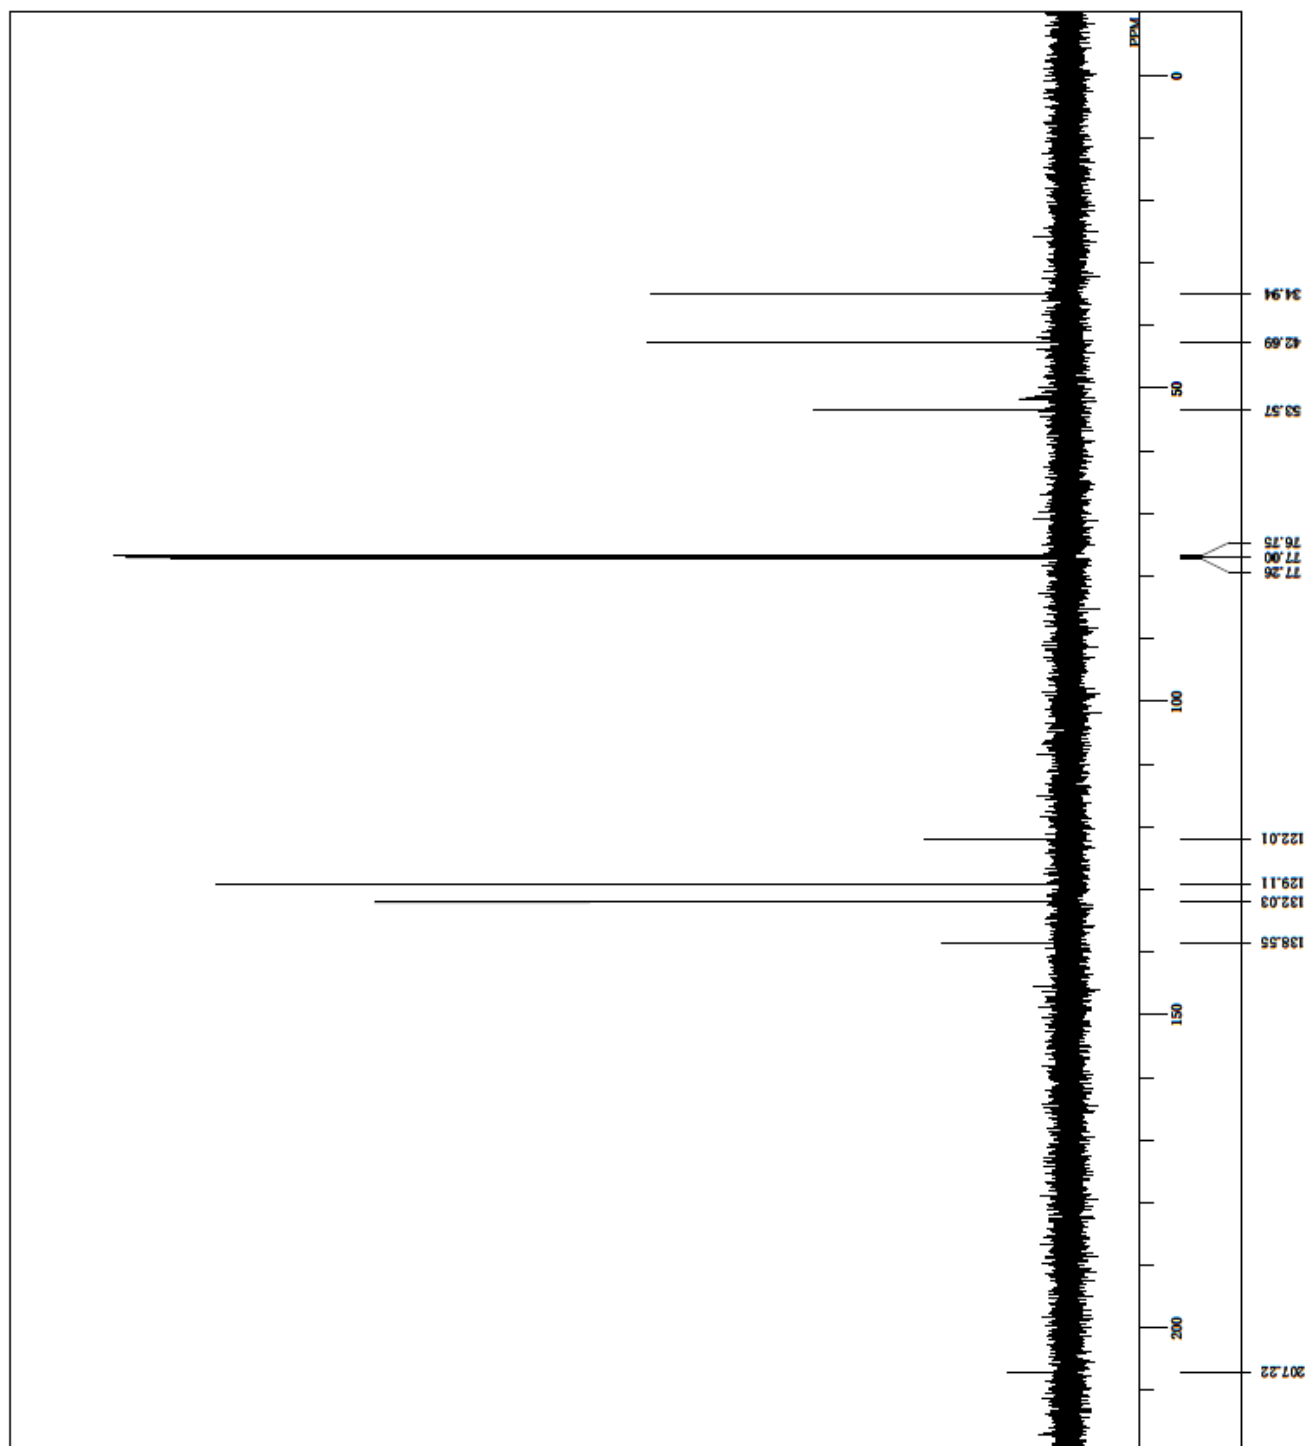

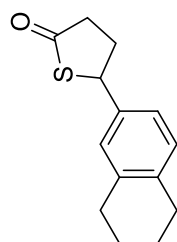

2l

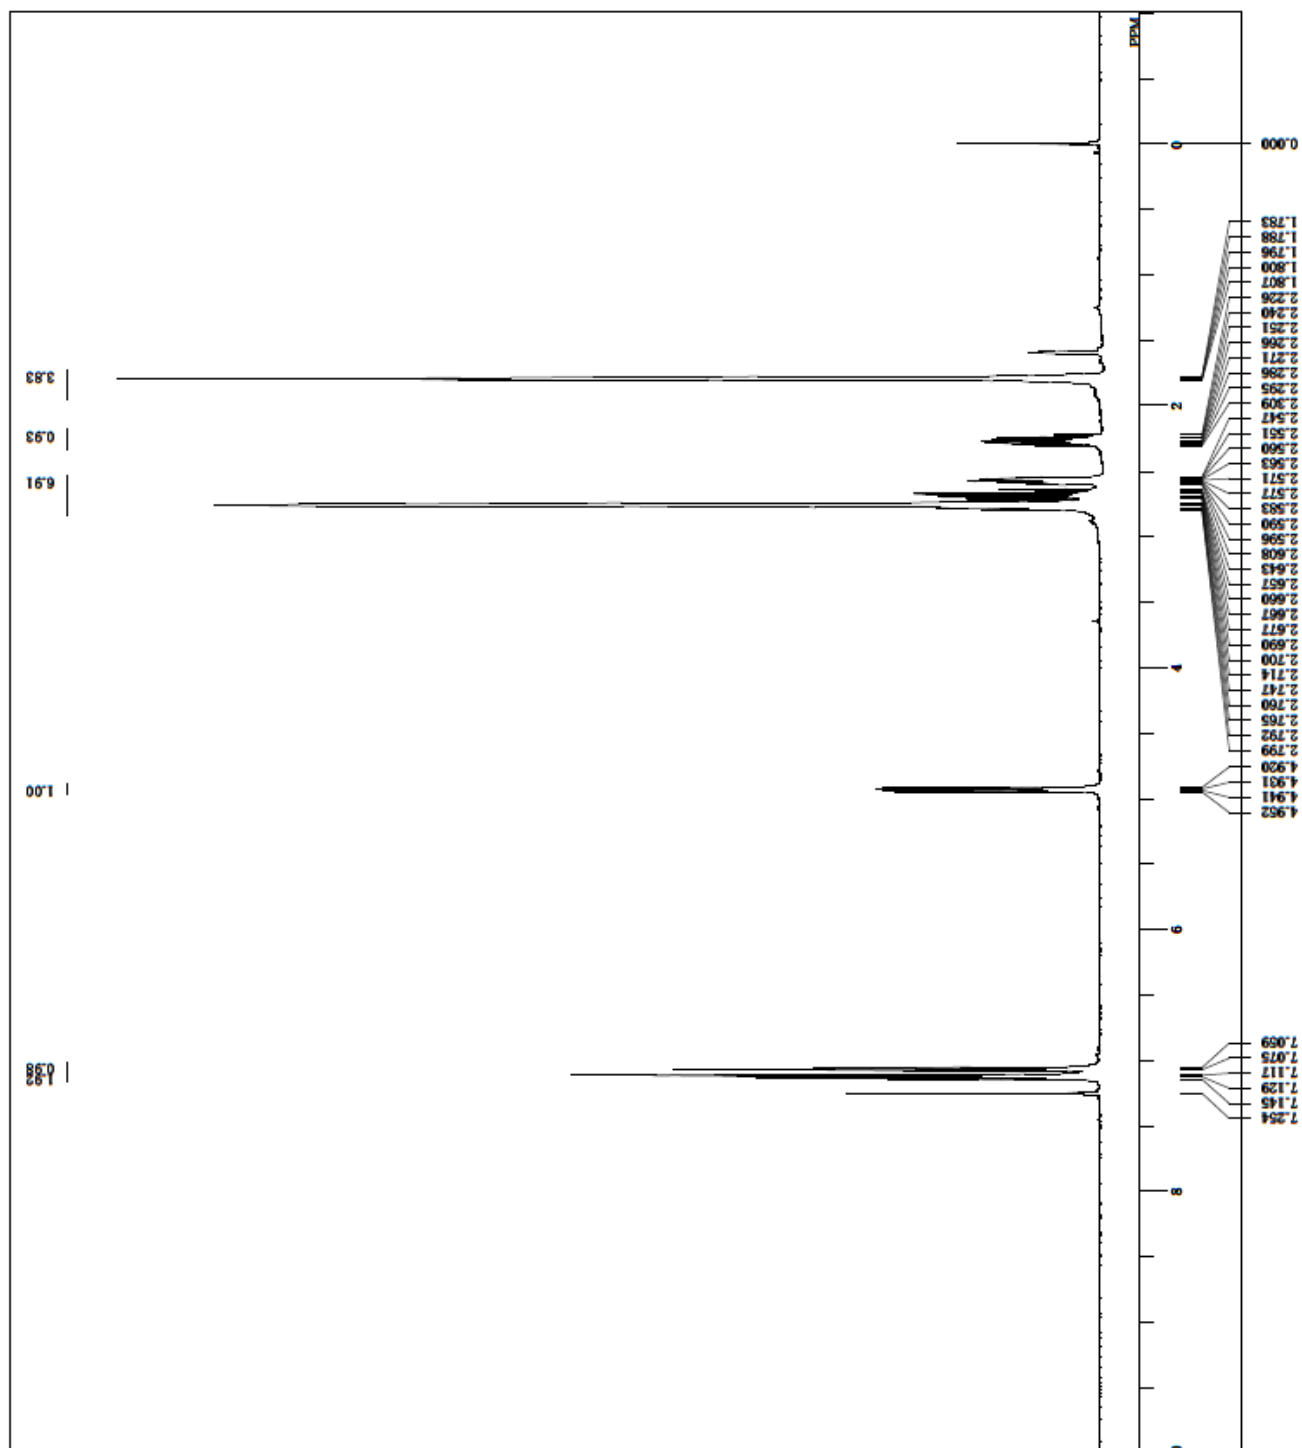

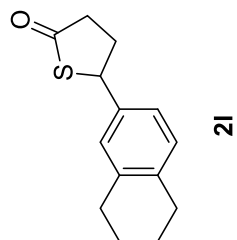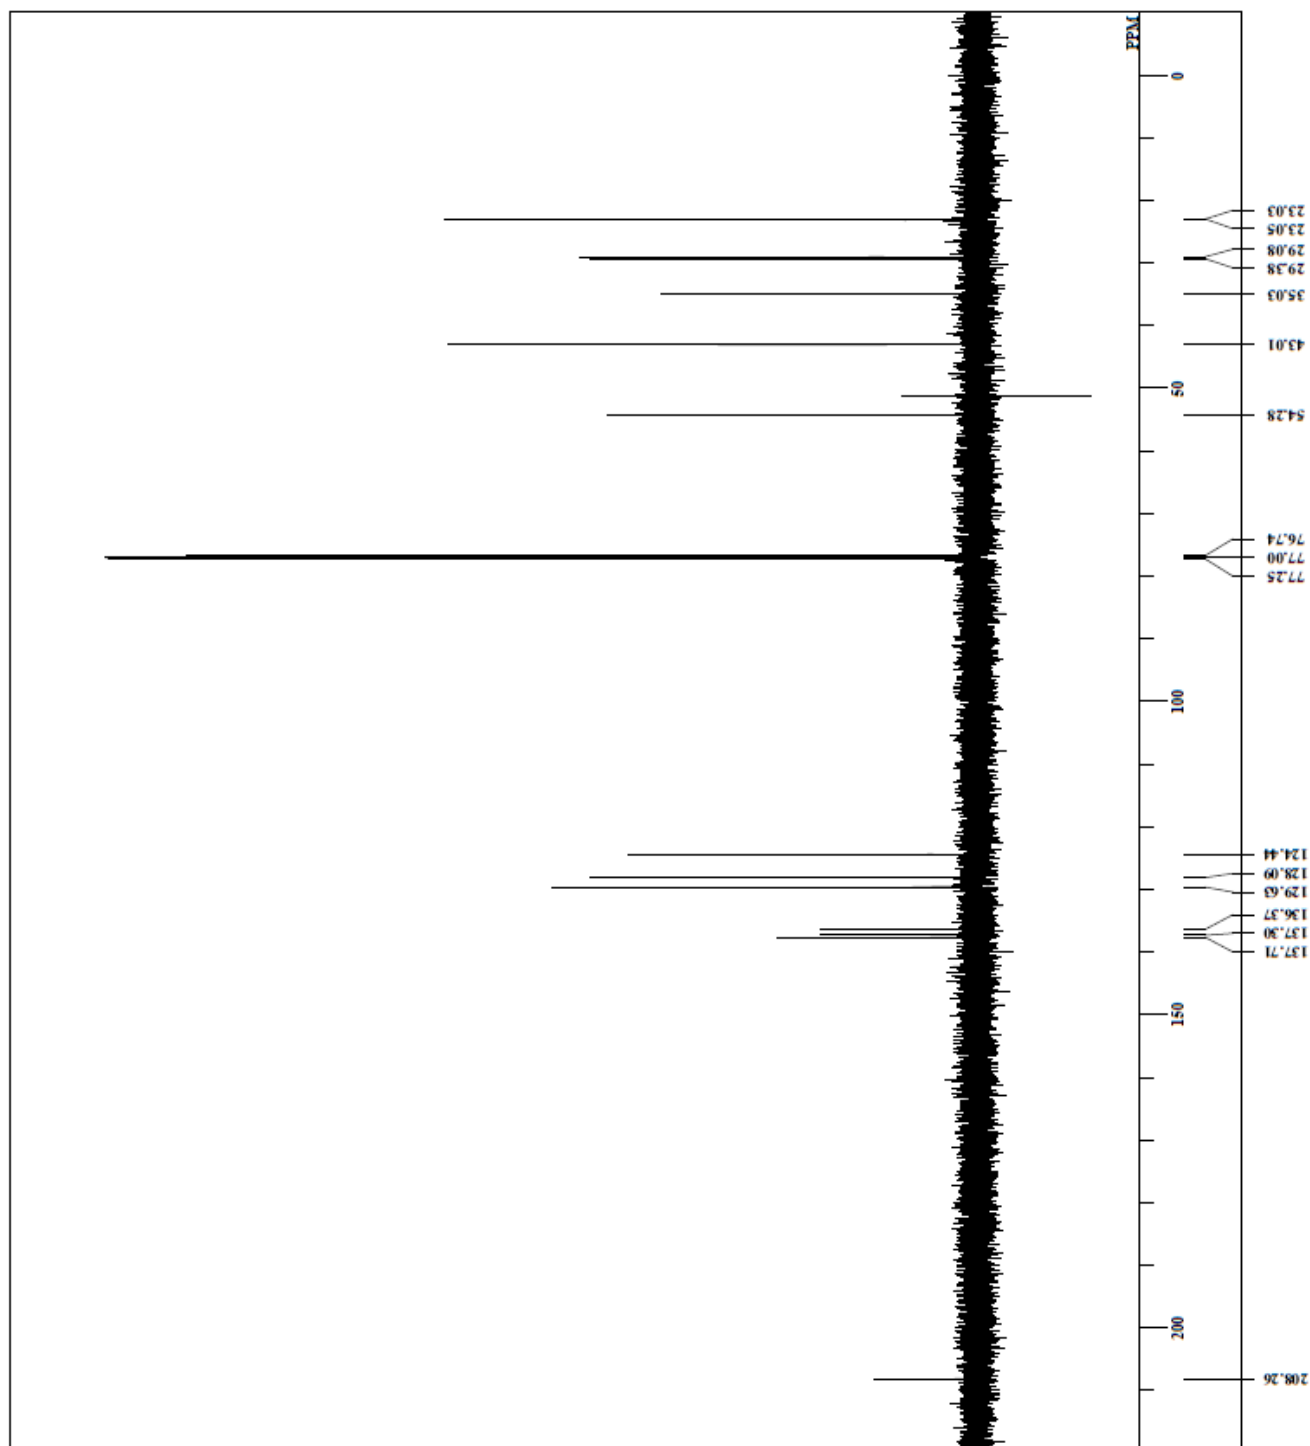

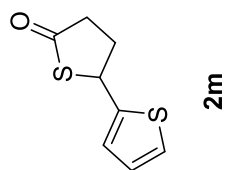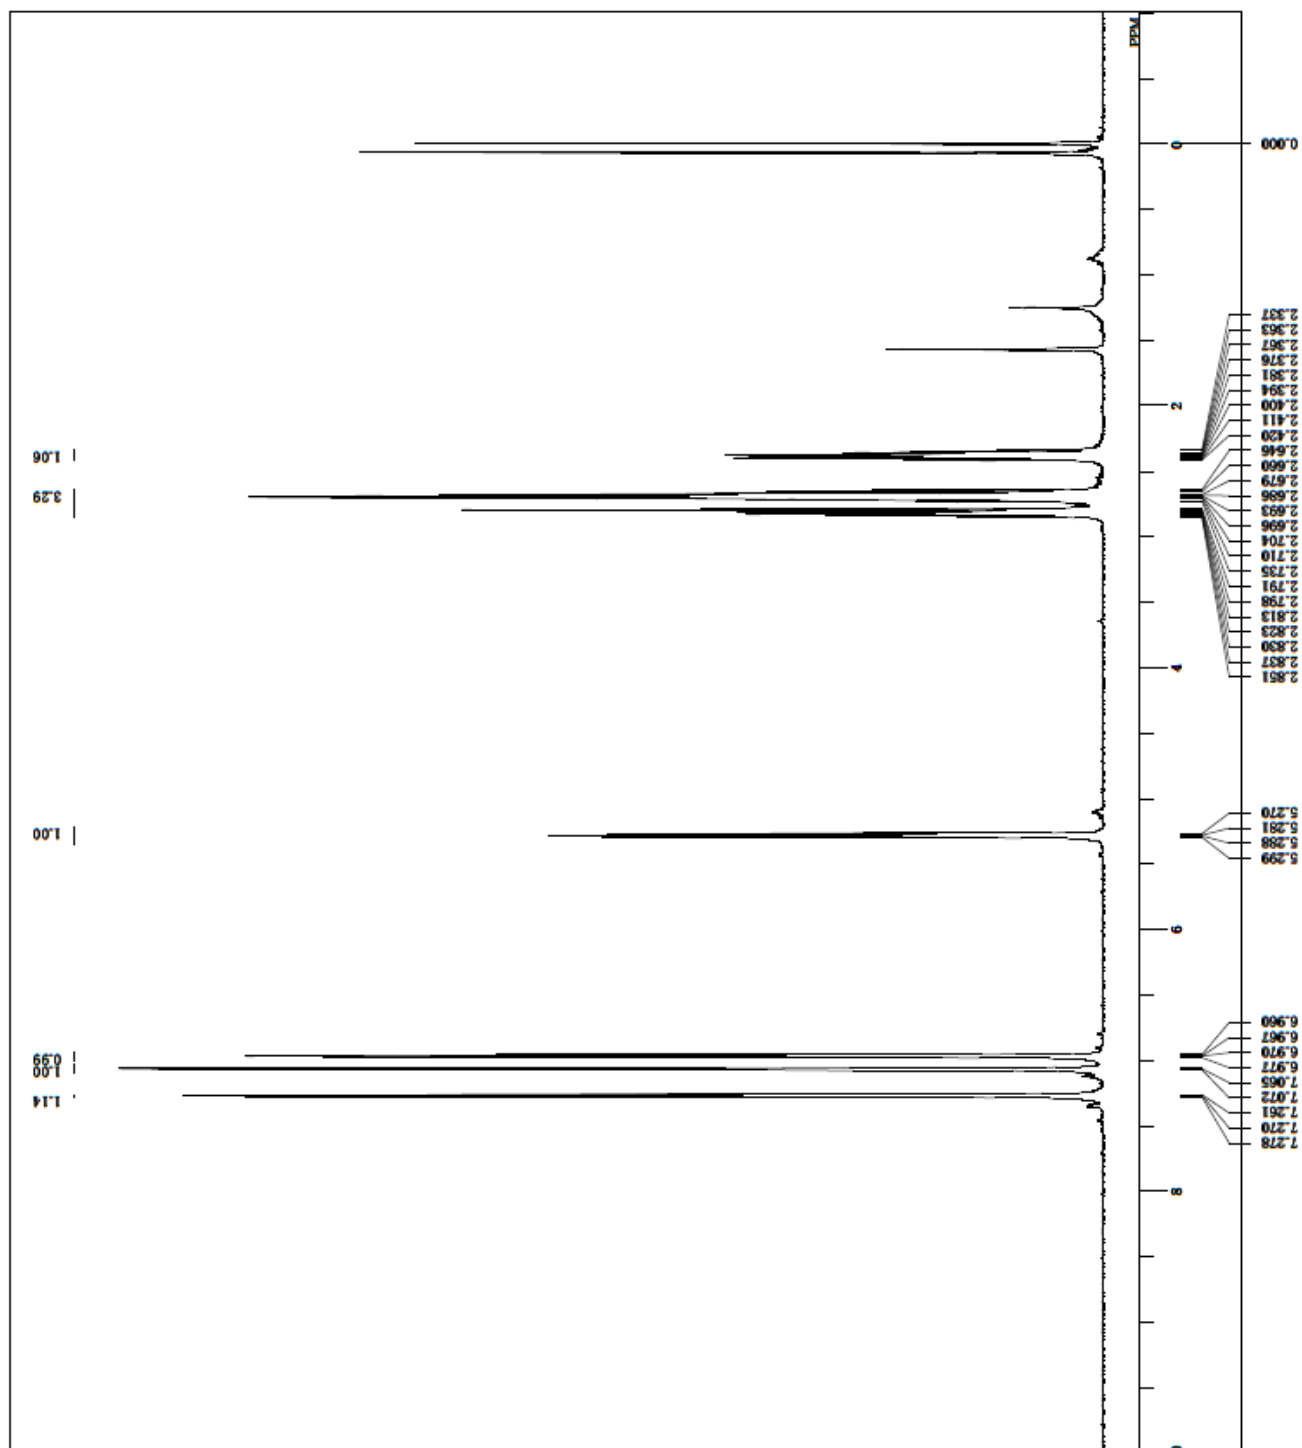

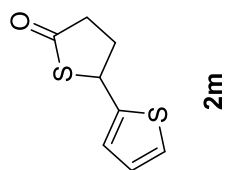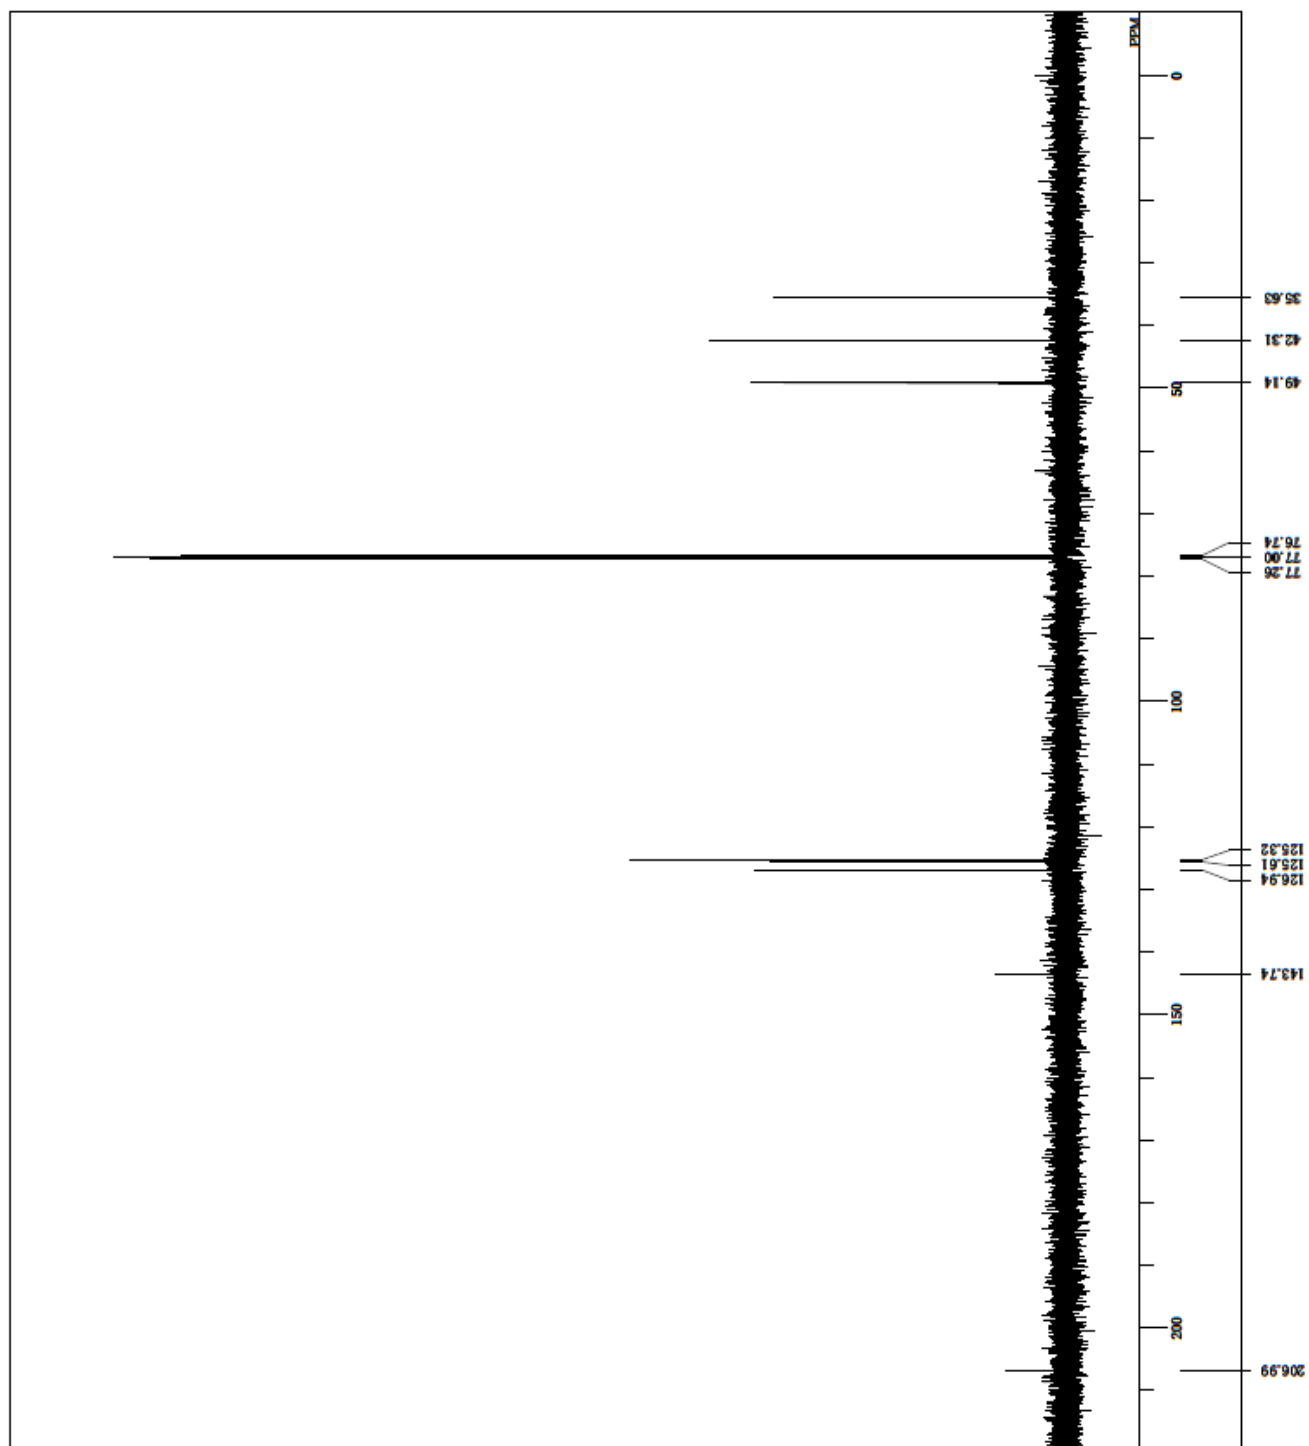

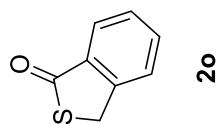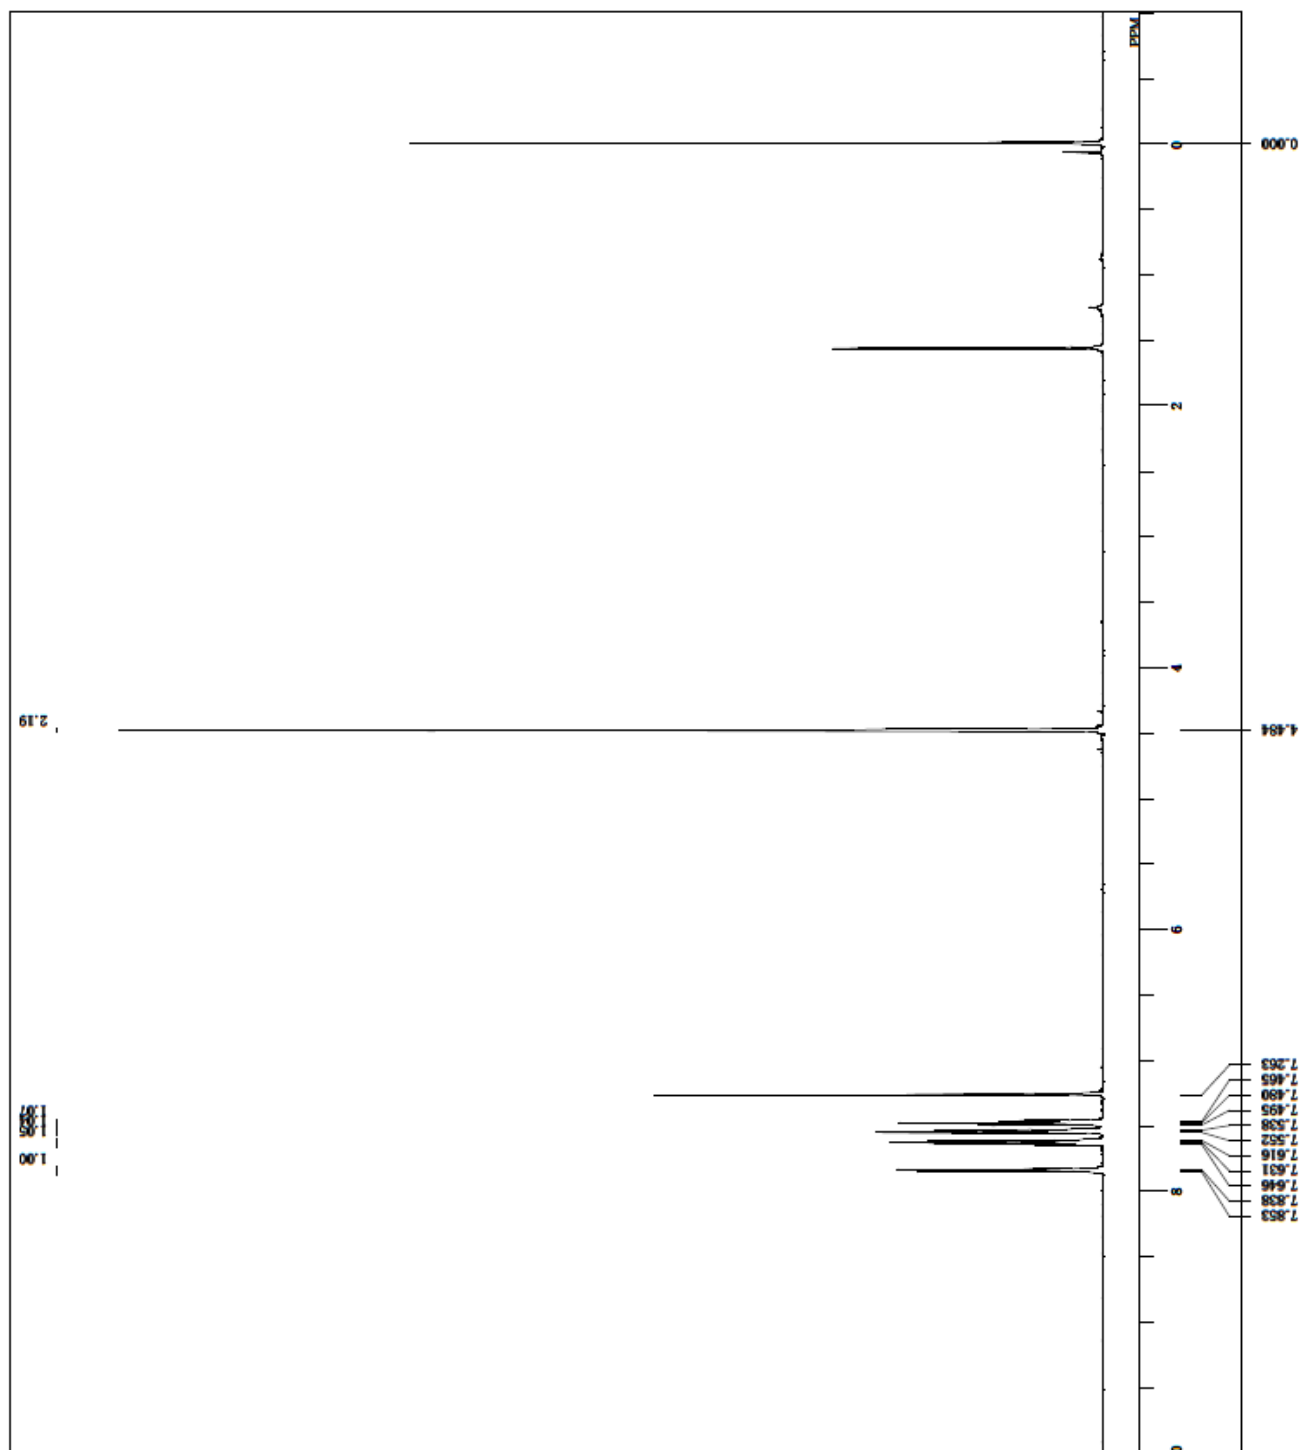

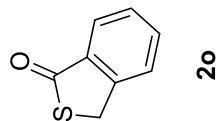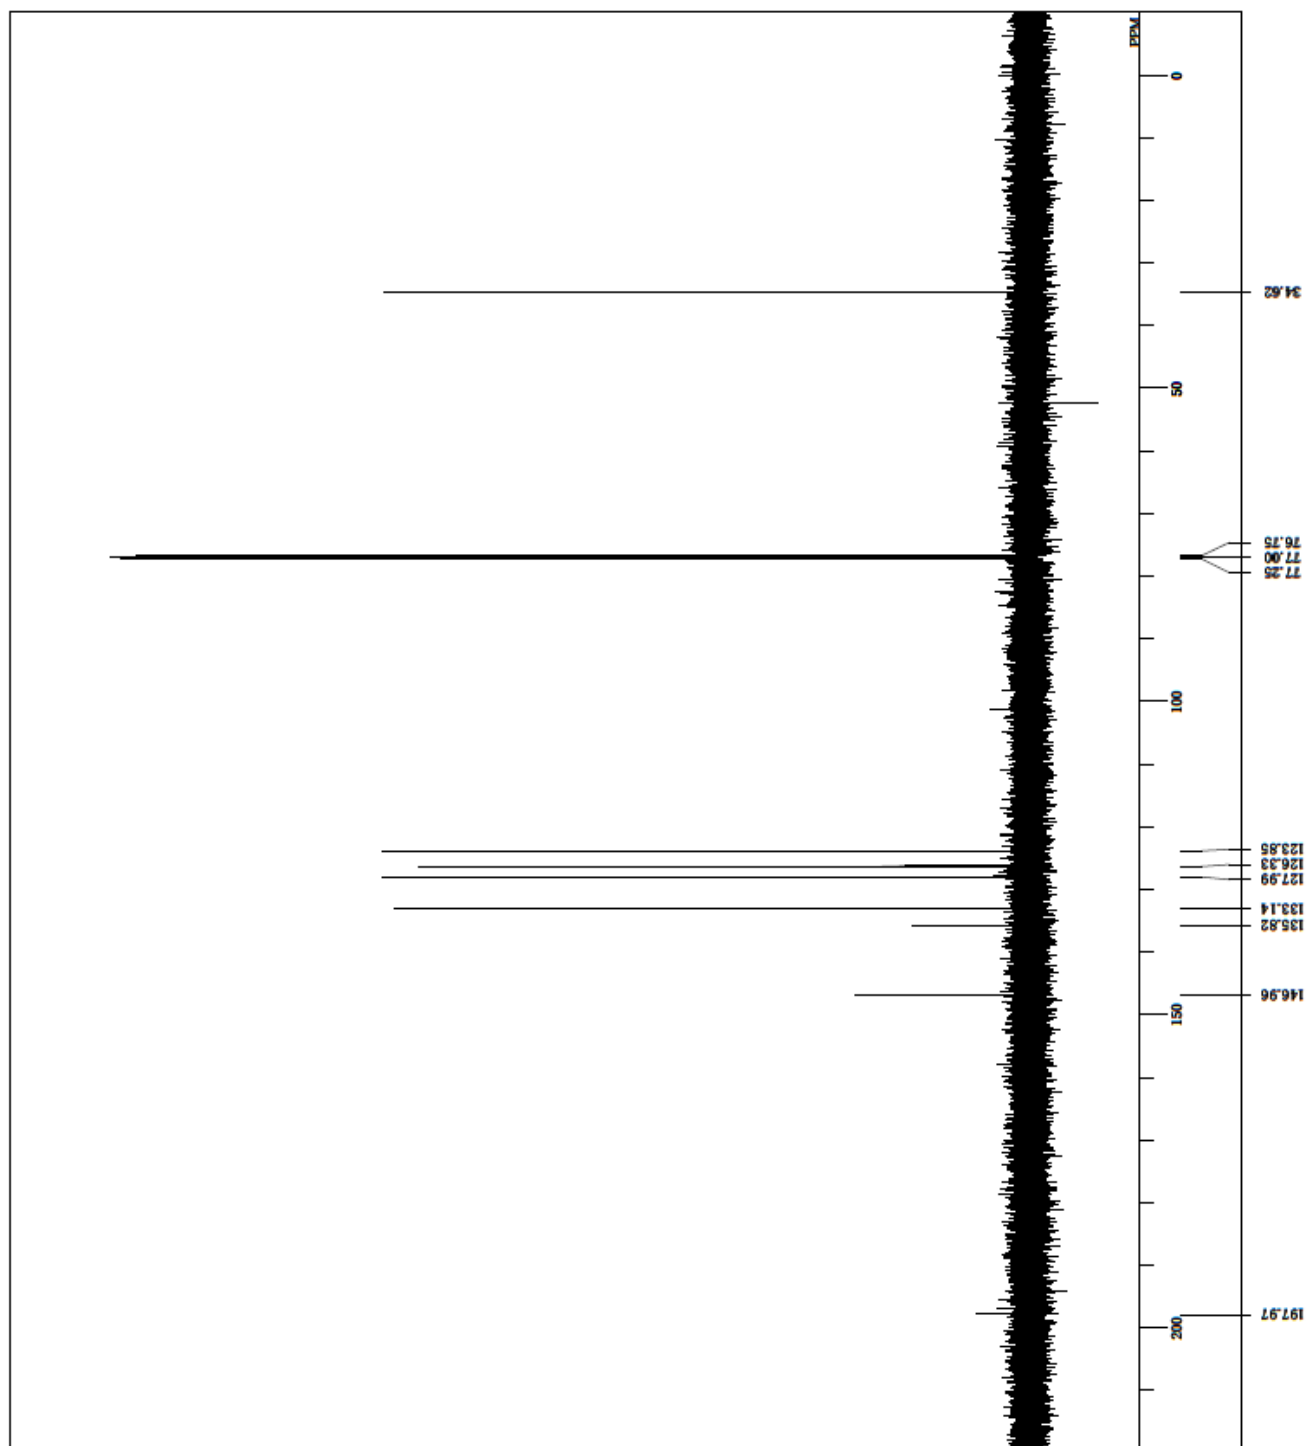

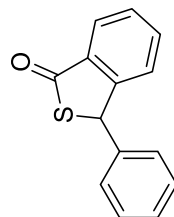

2p

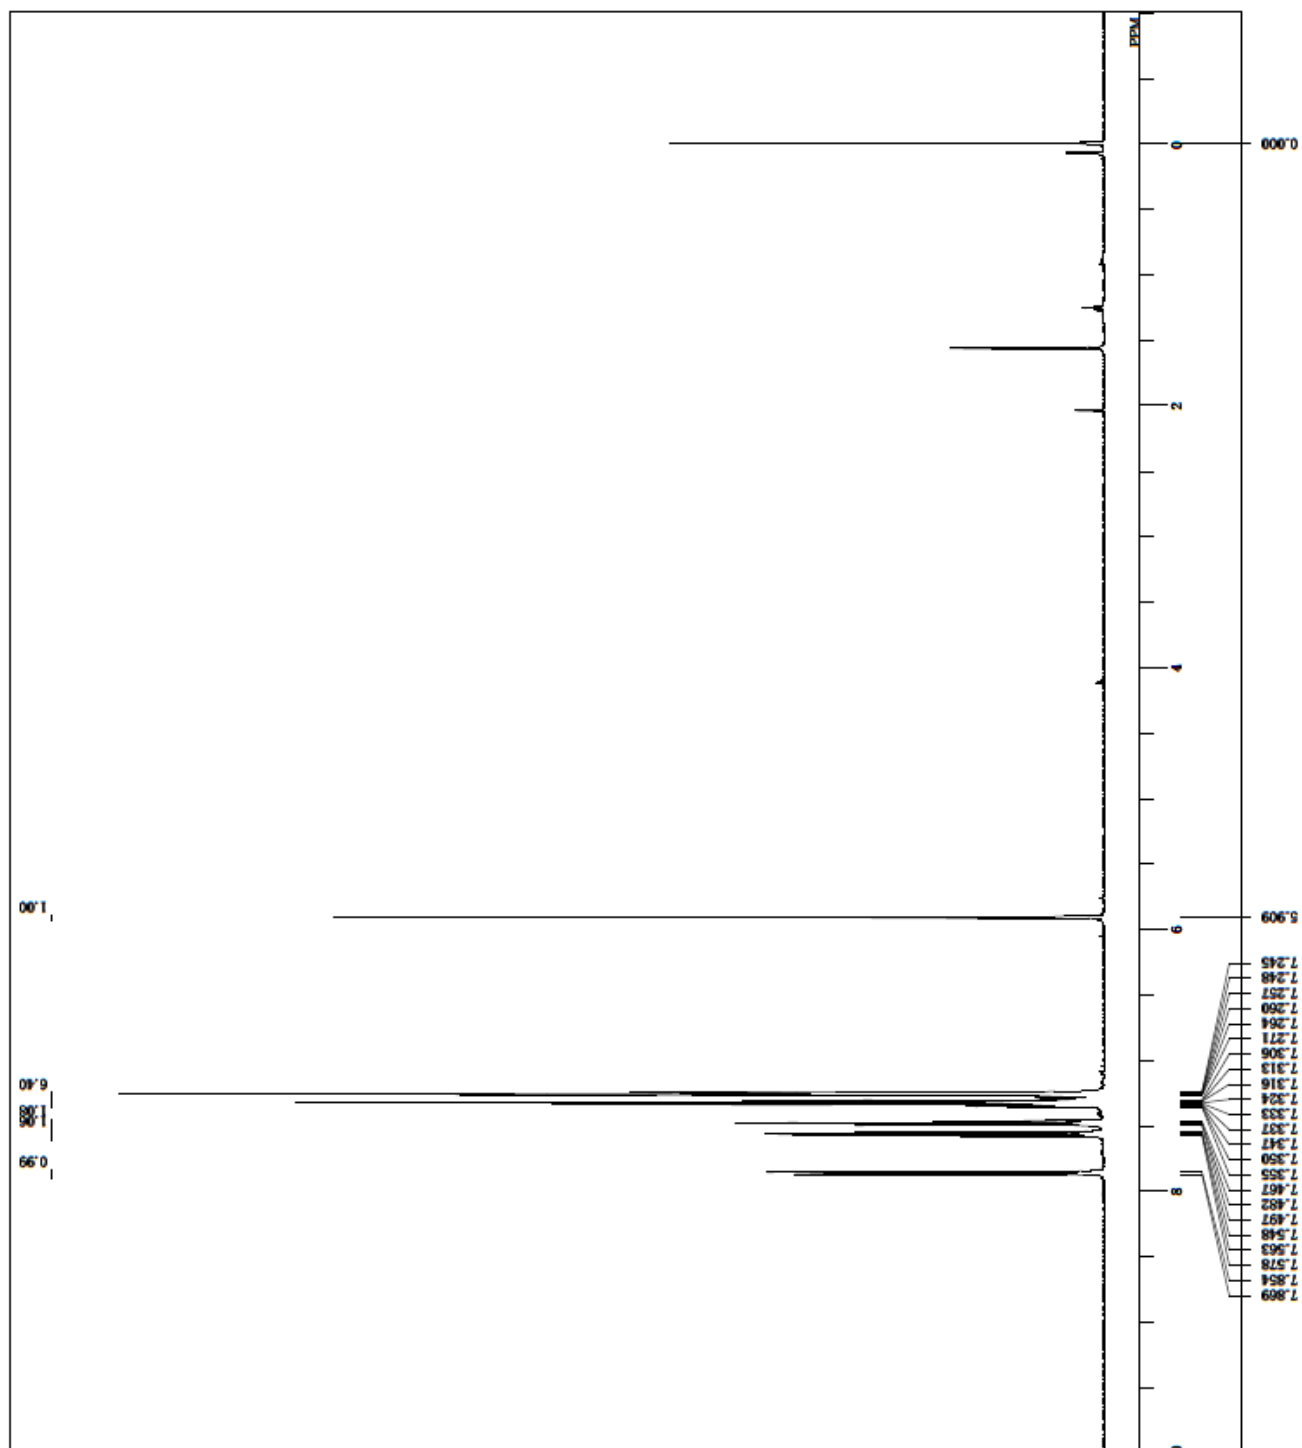

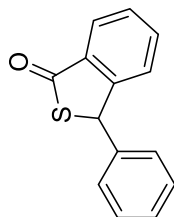

2p

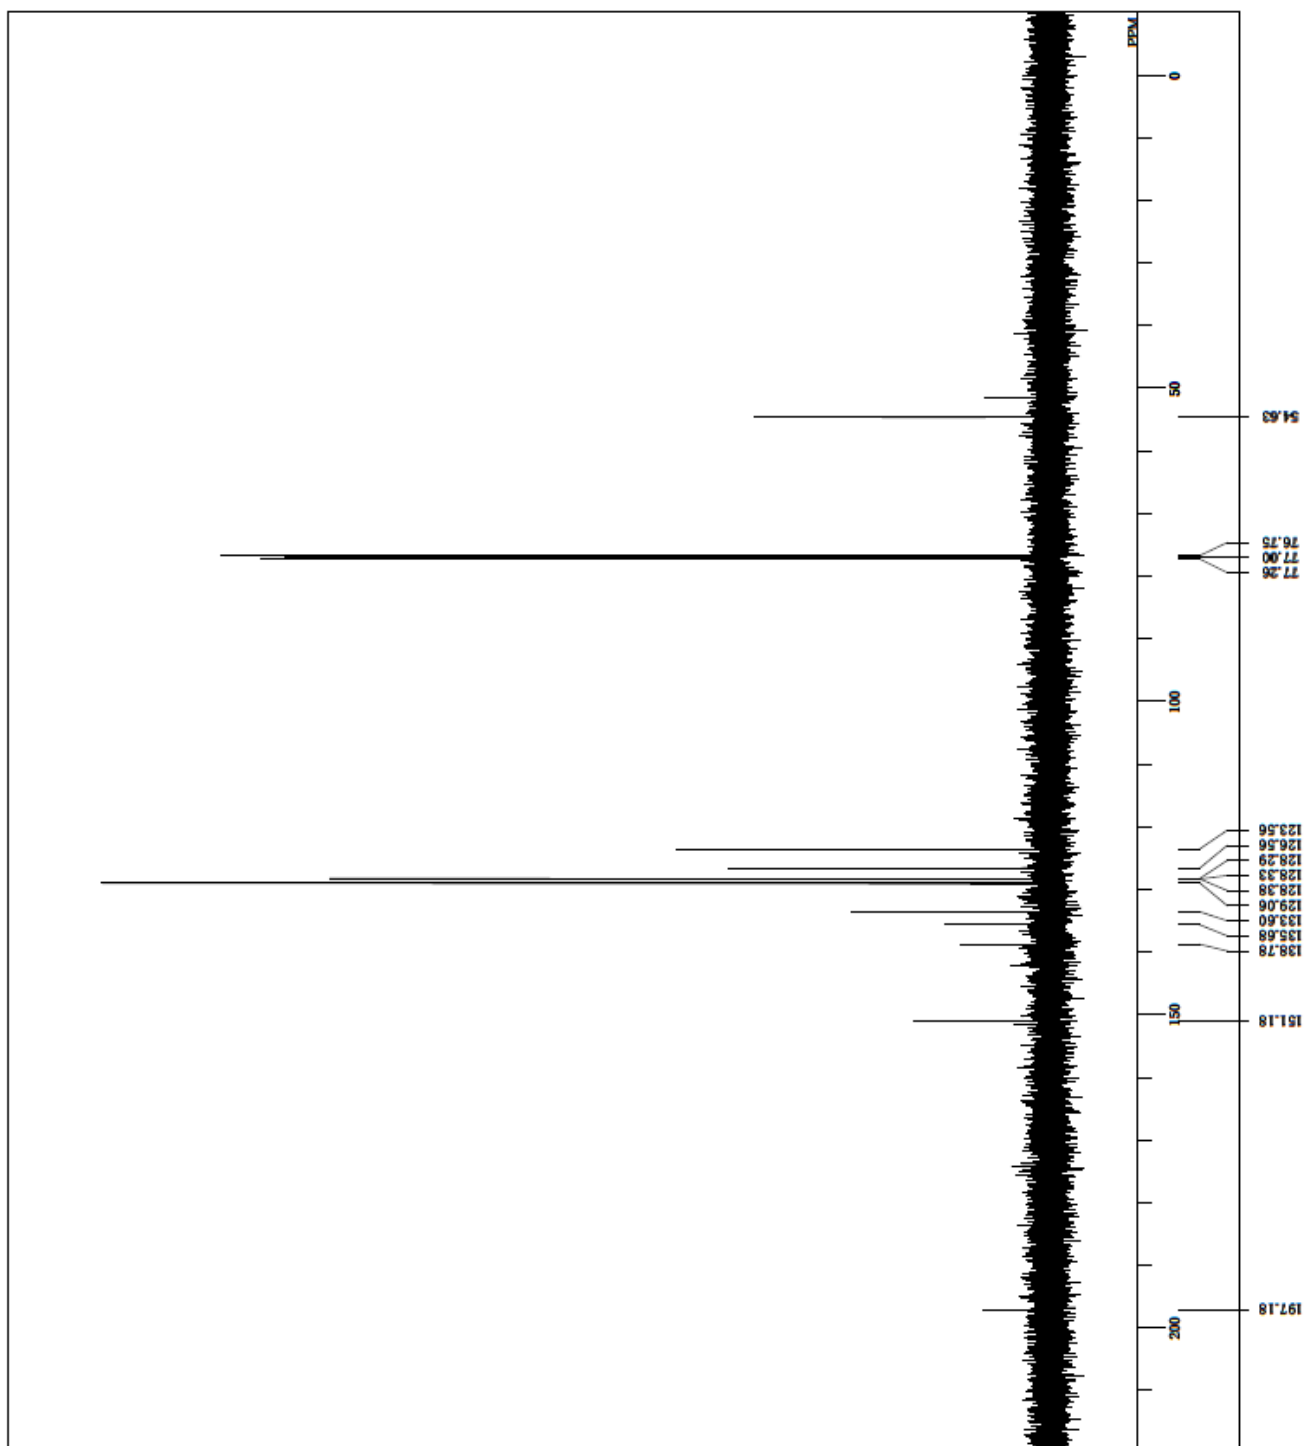

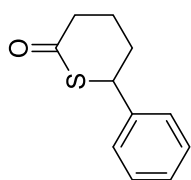

2q

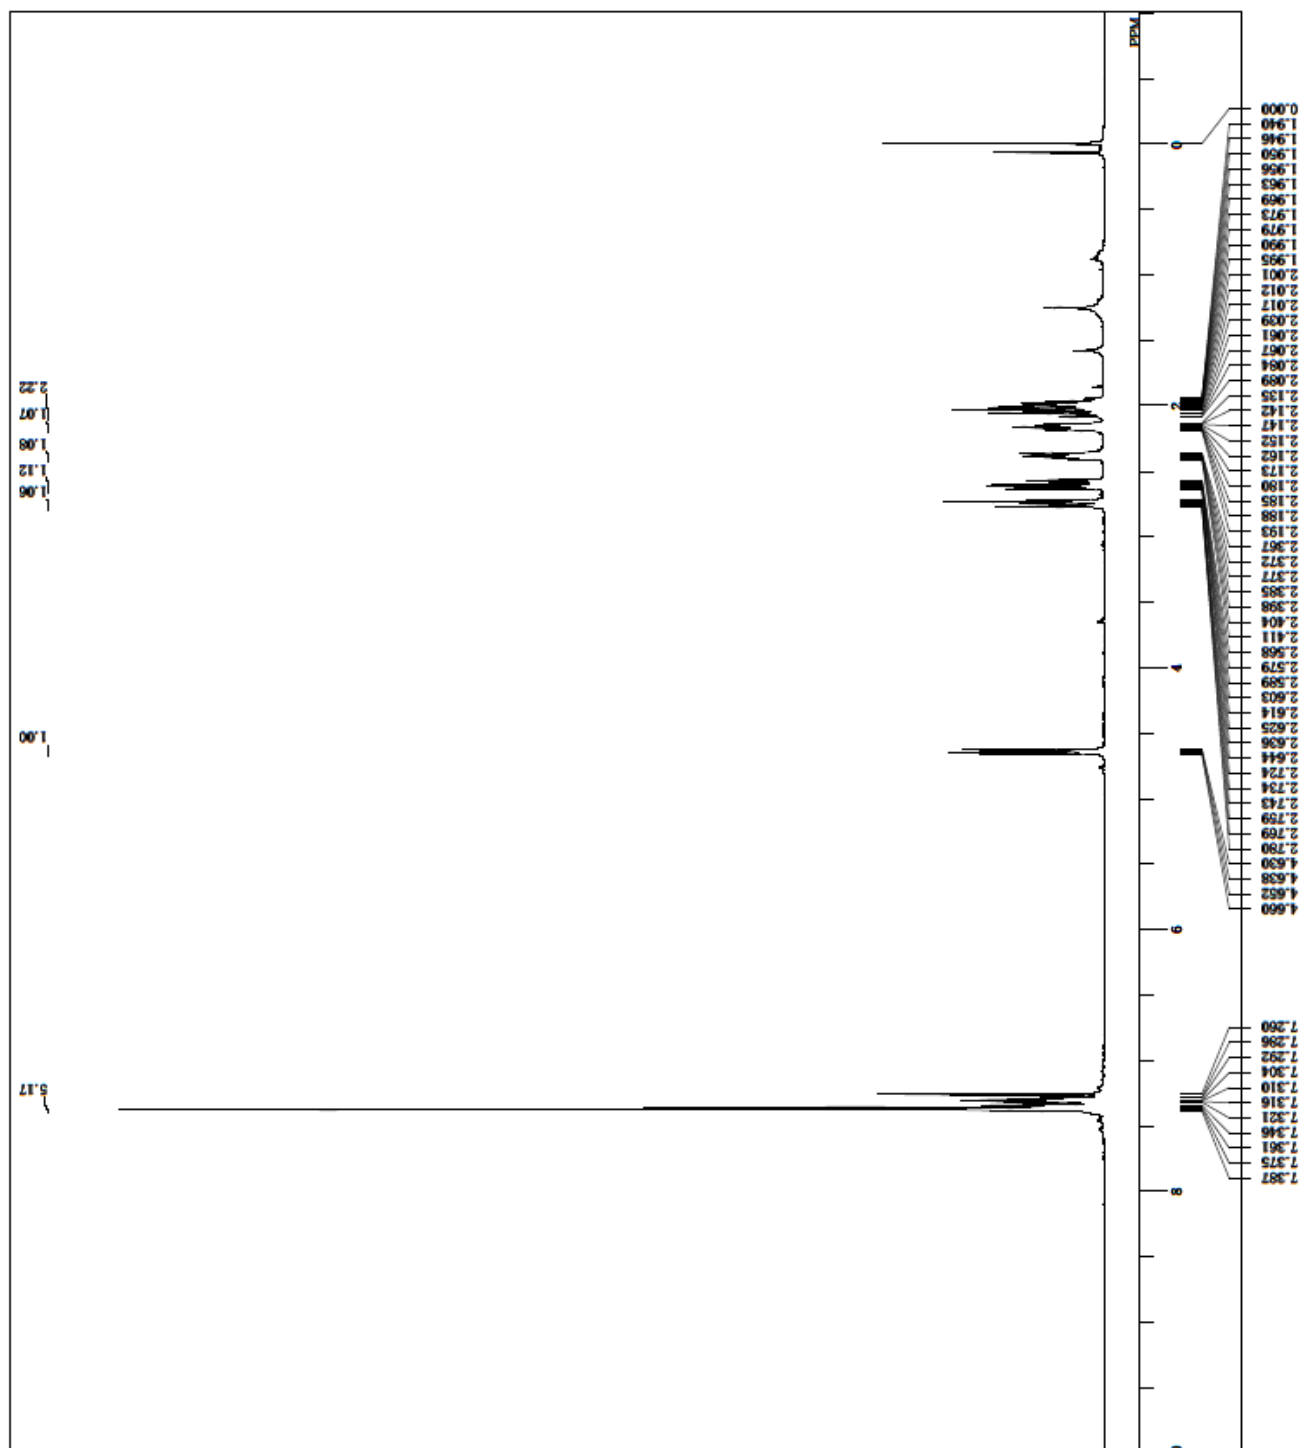

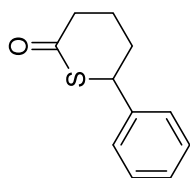

2q

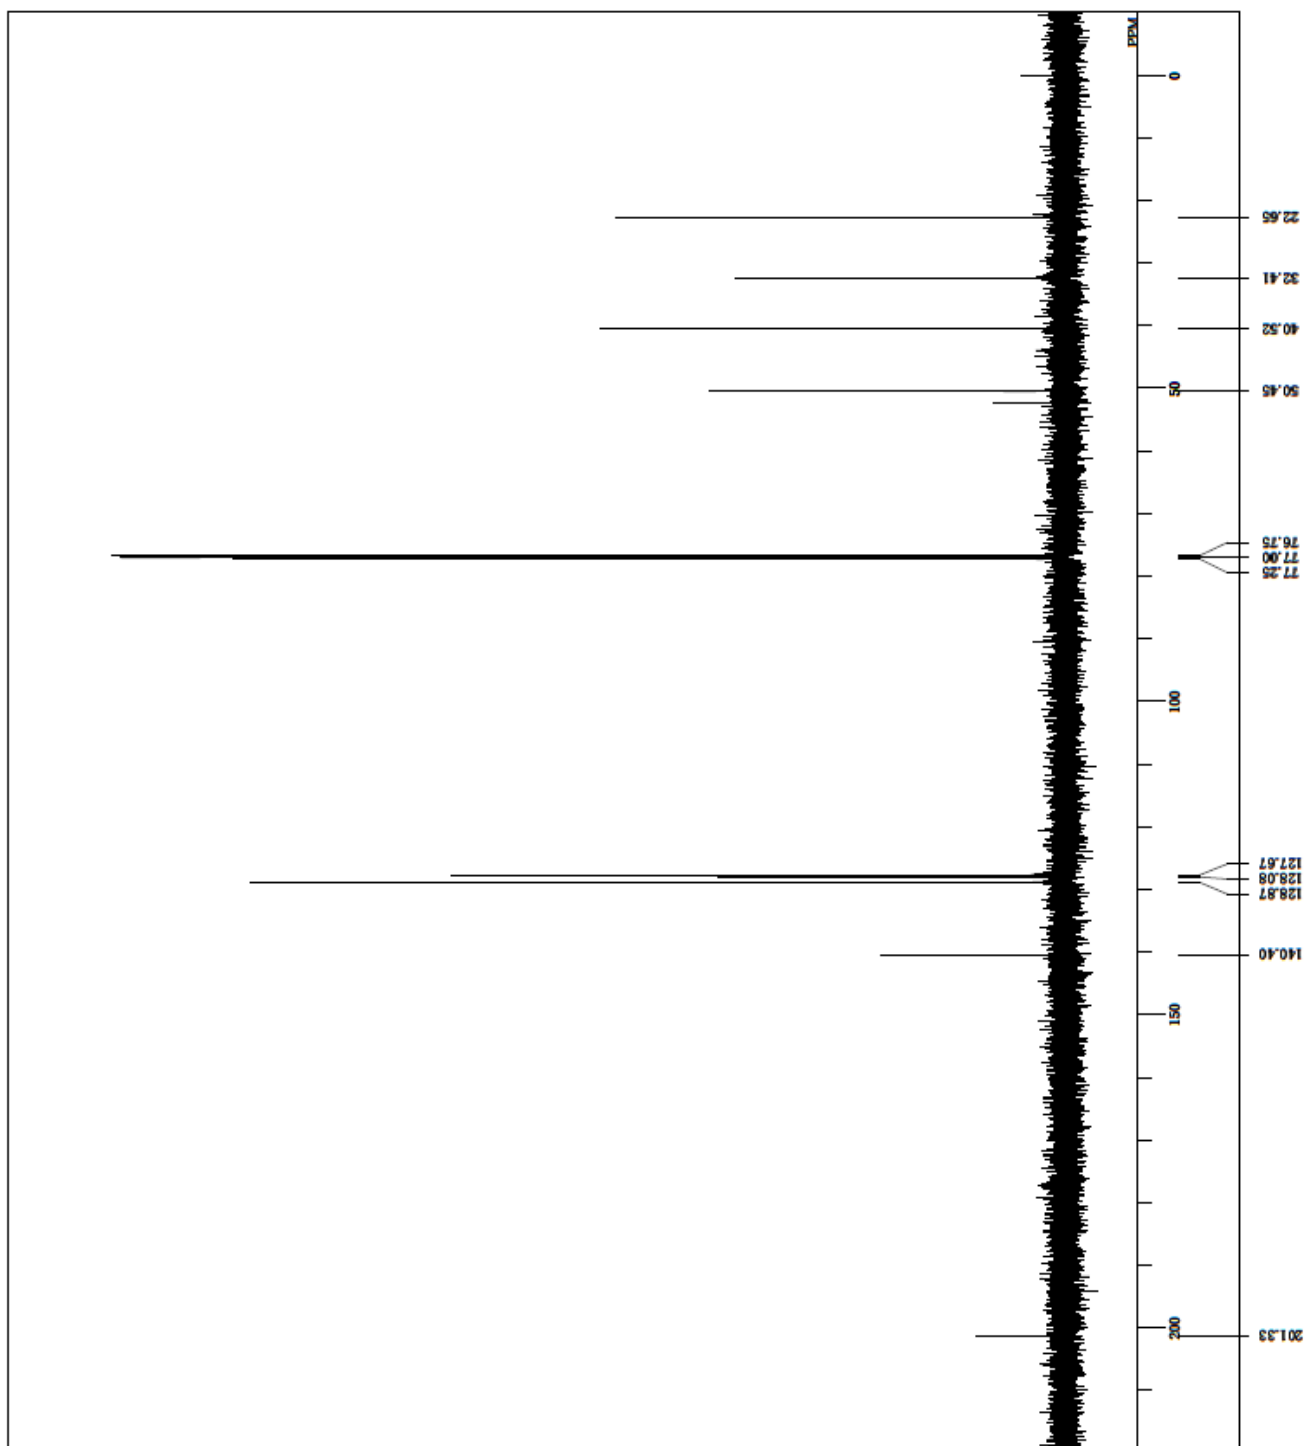

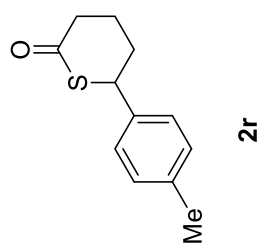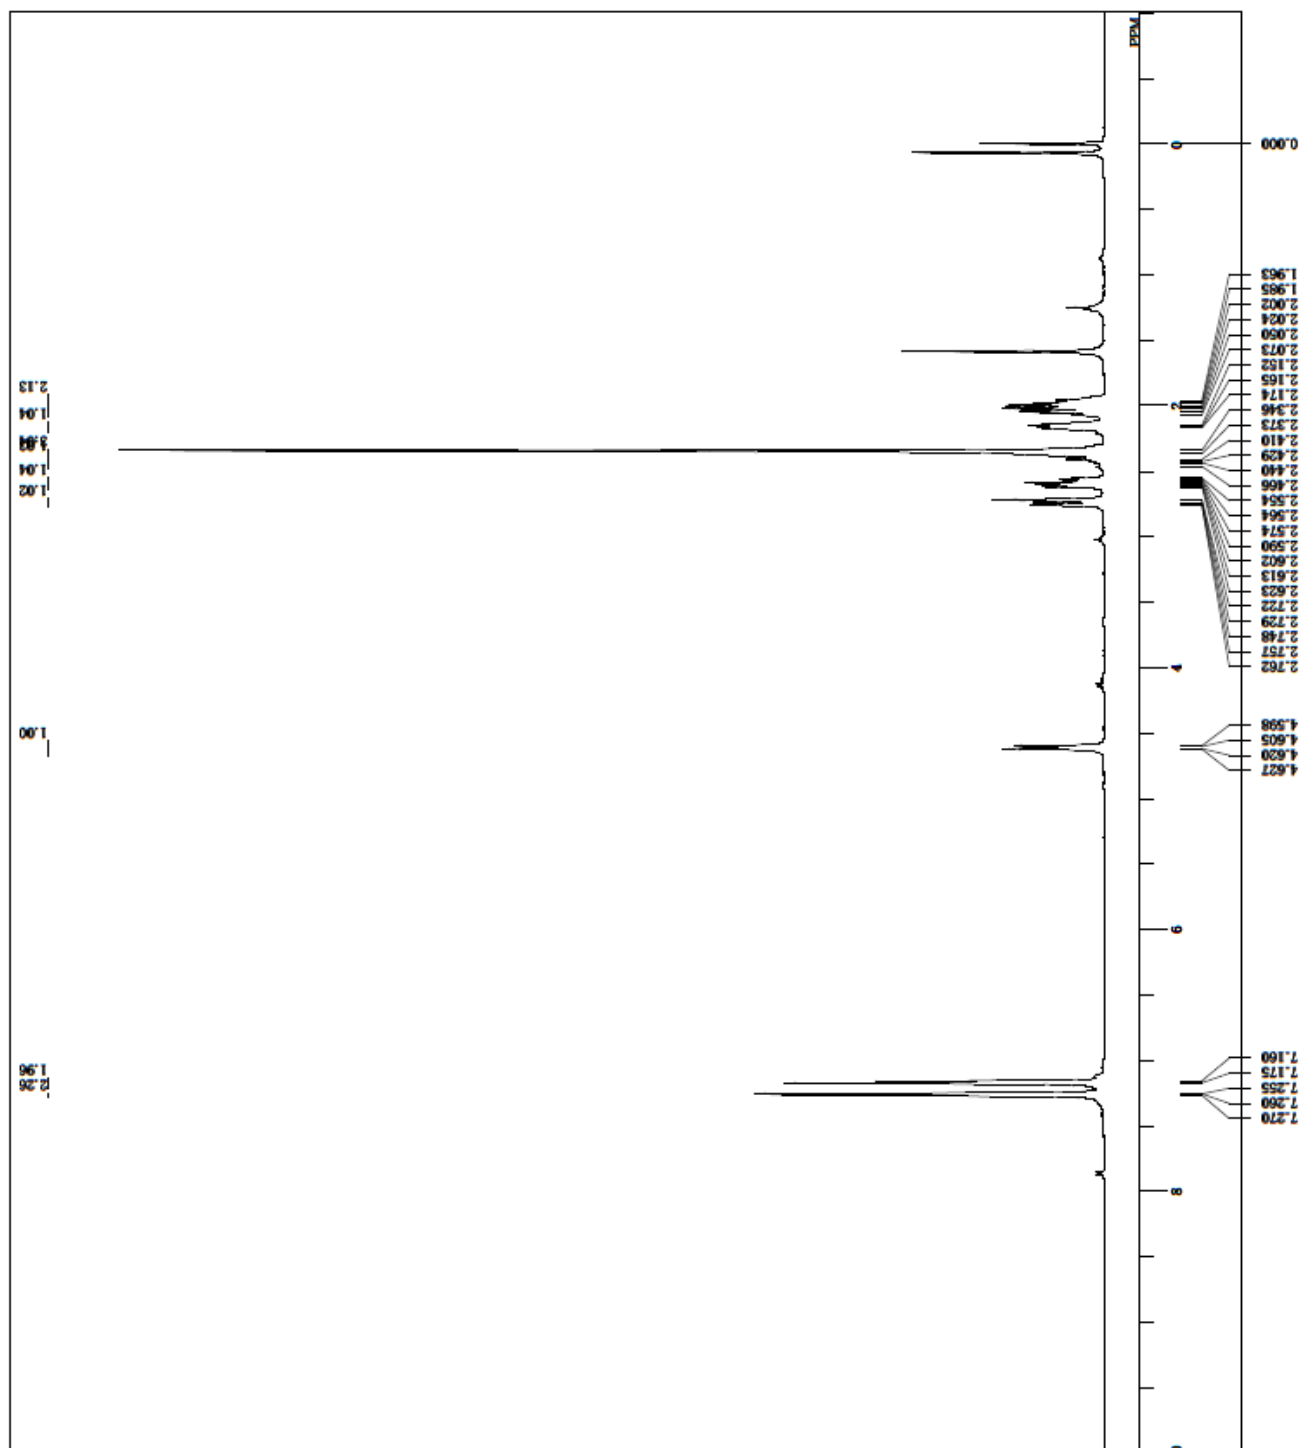

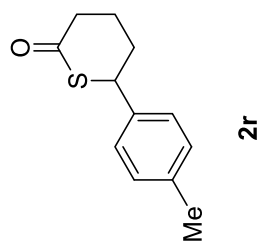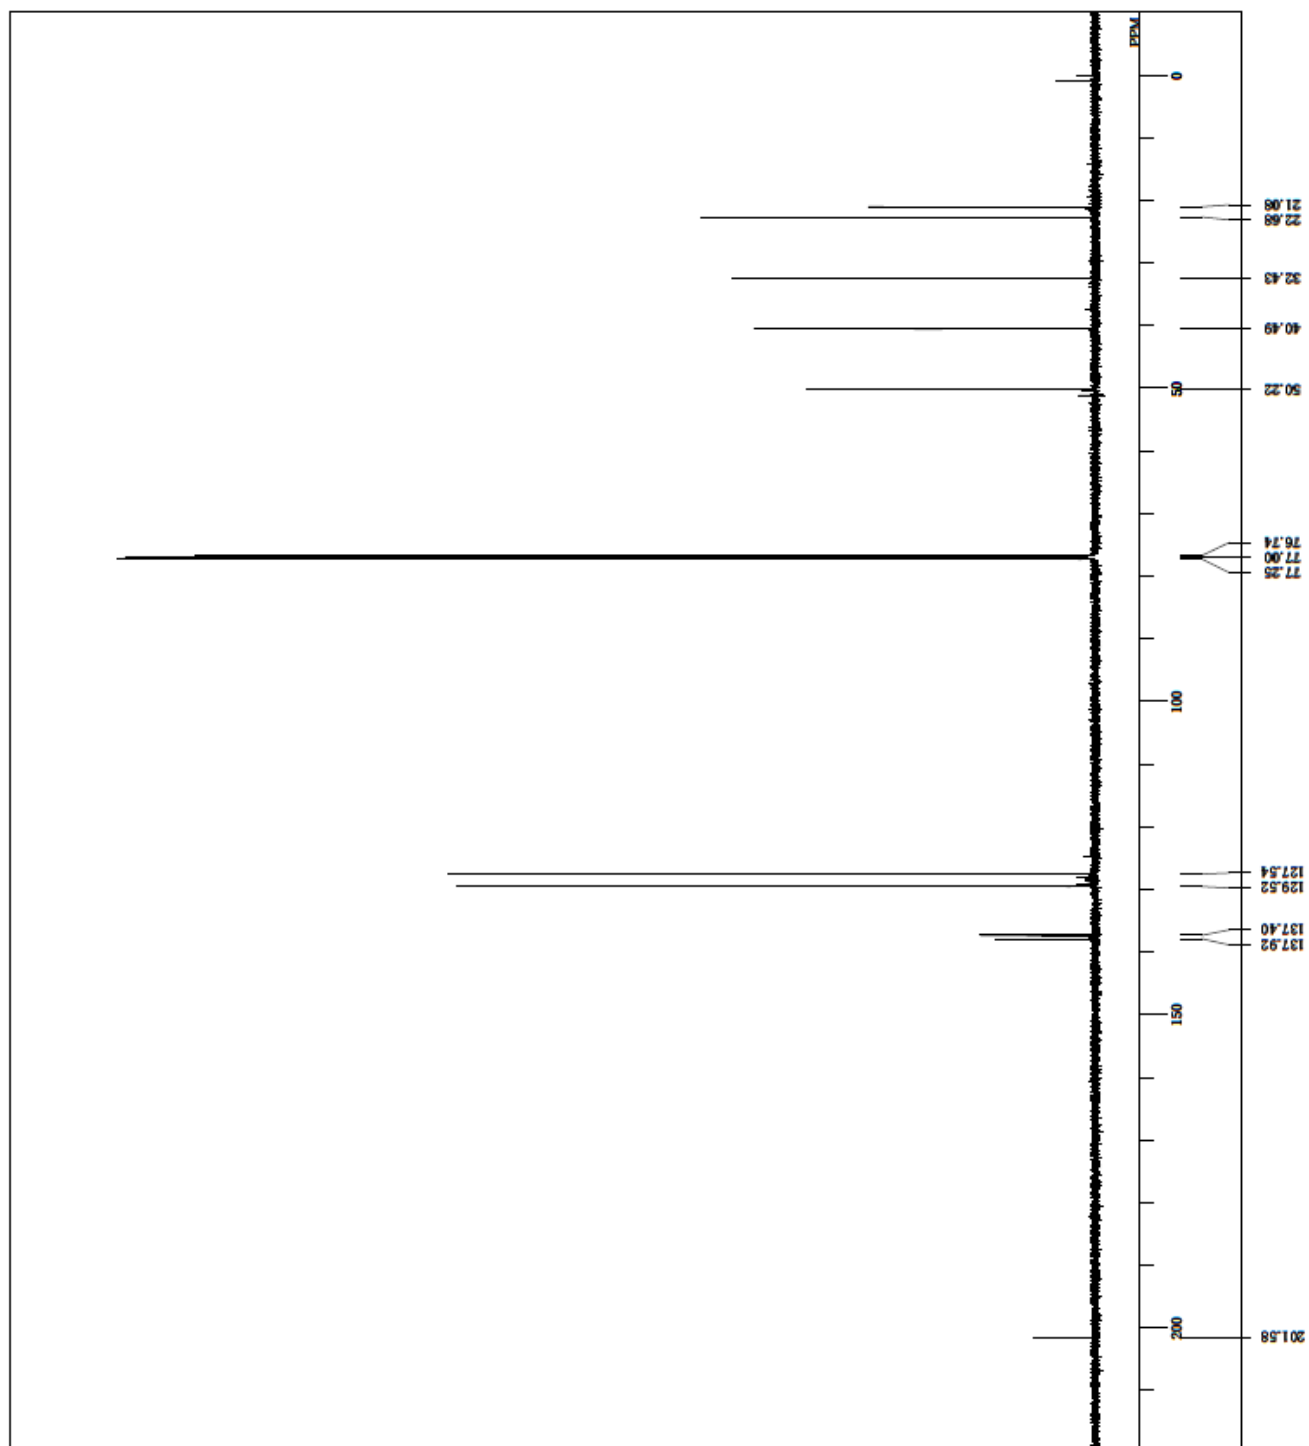

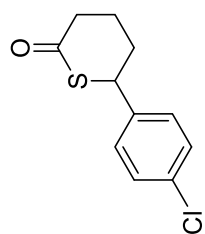

2s

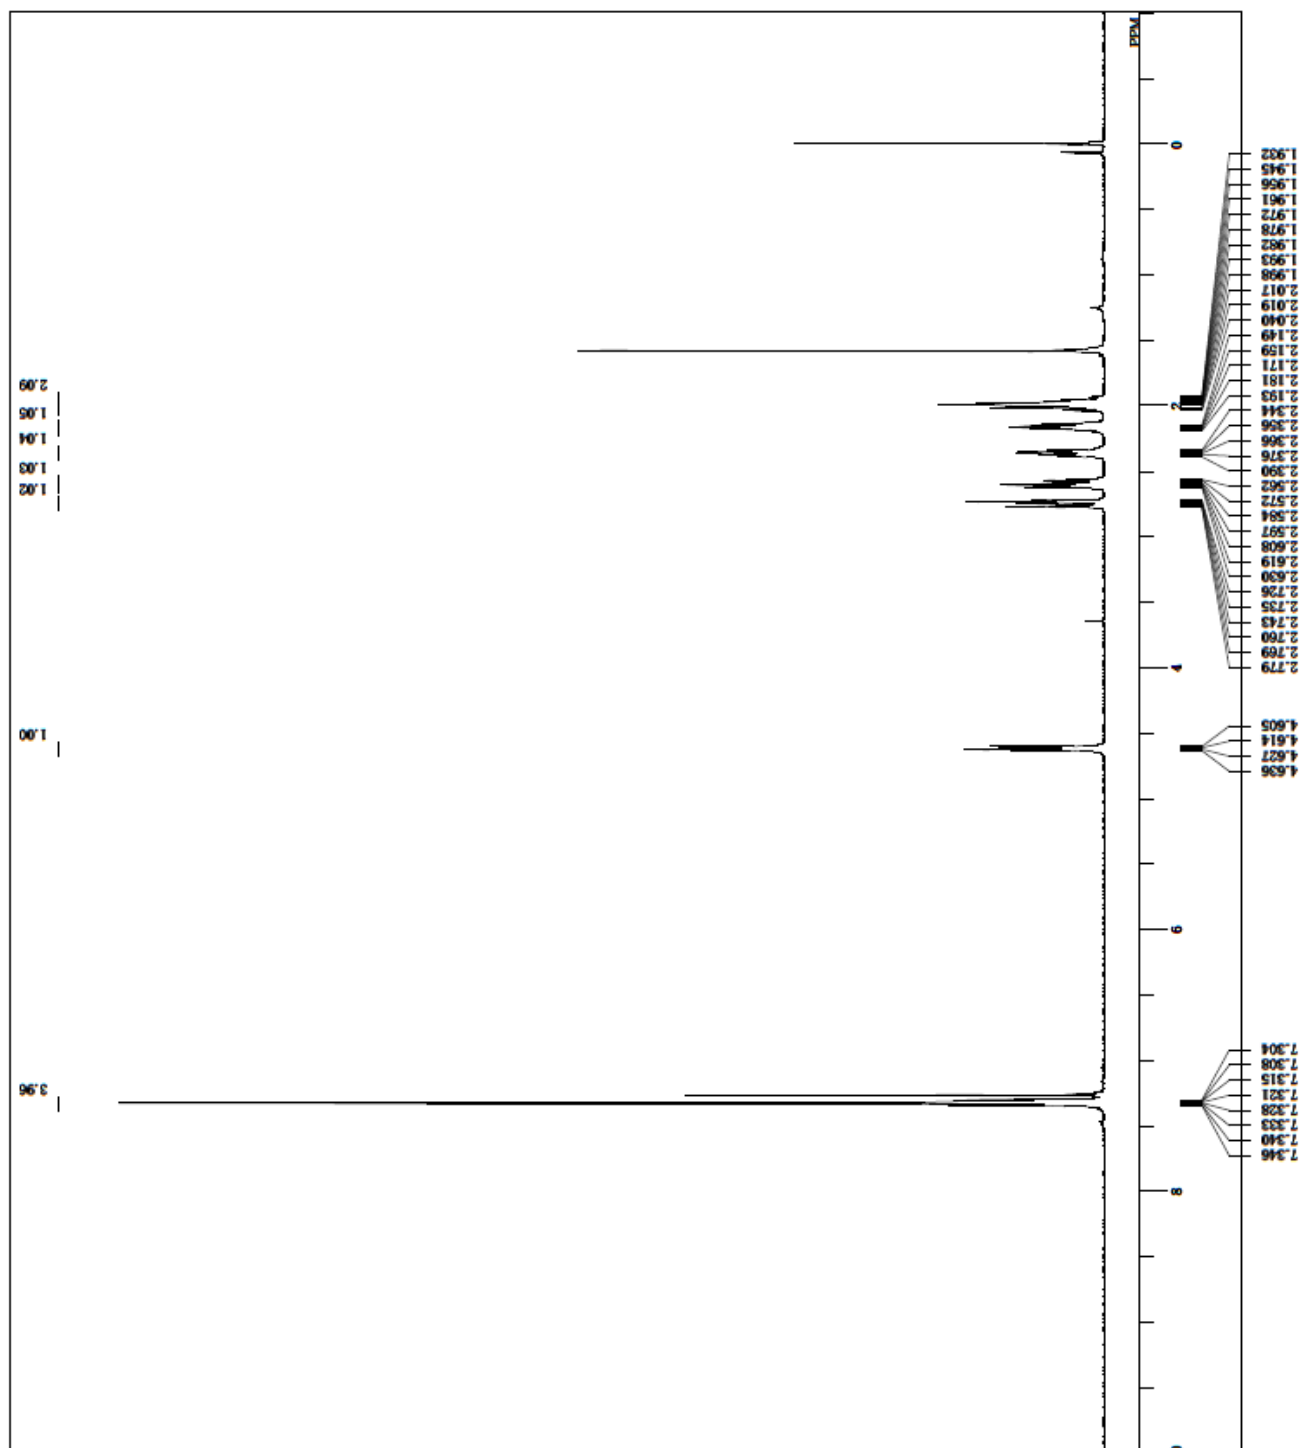

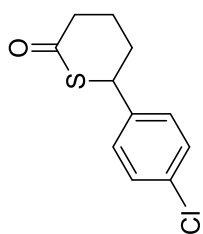

2s

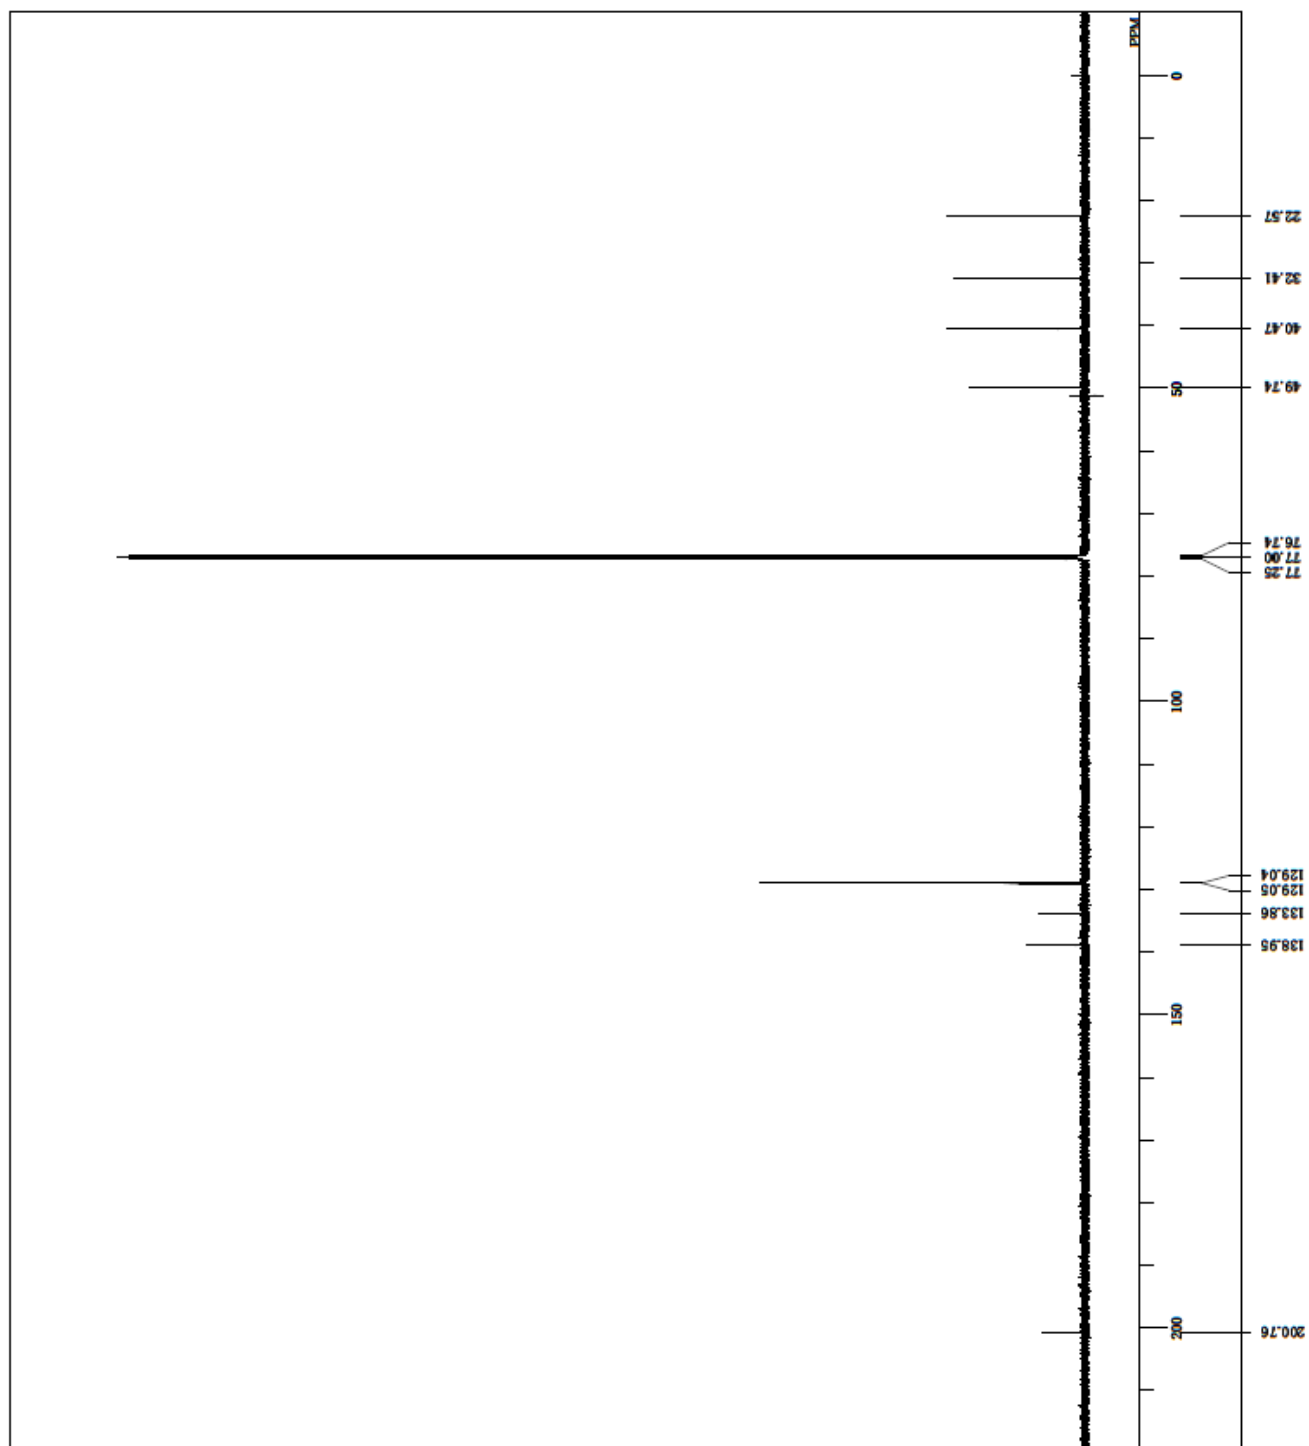

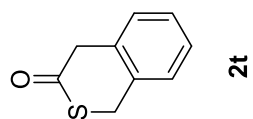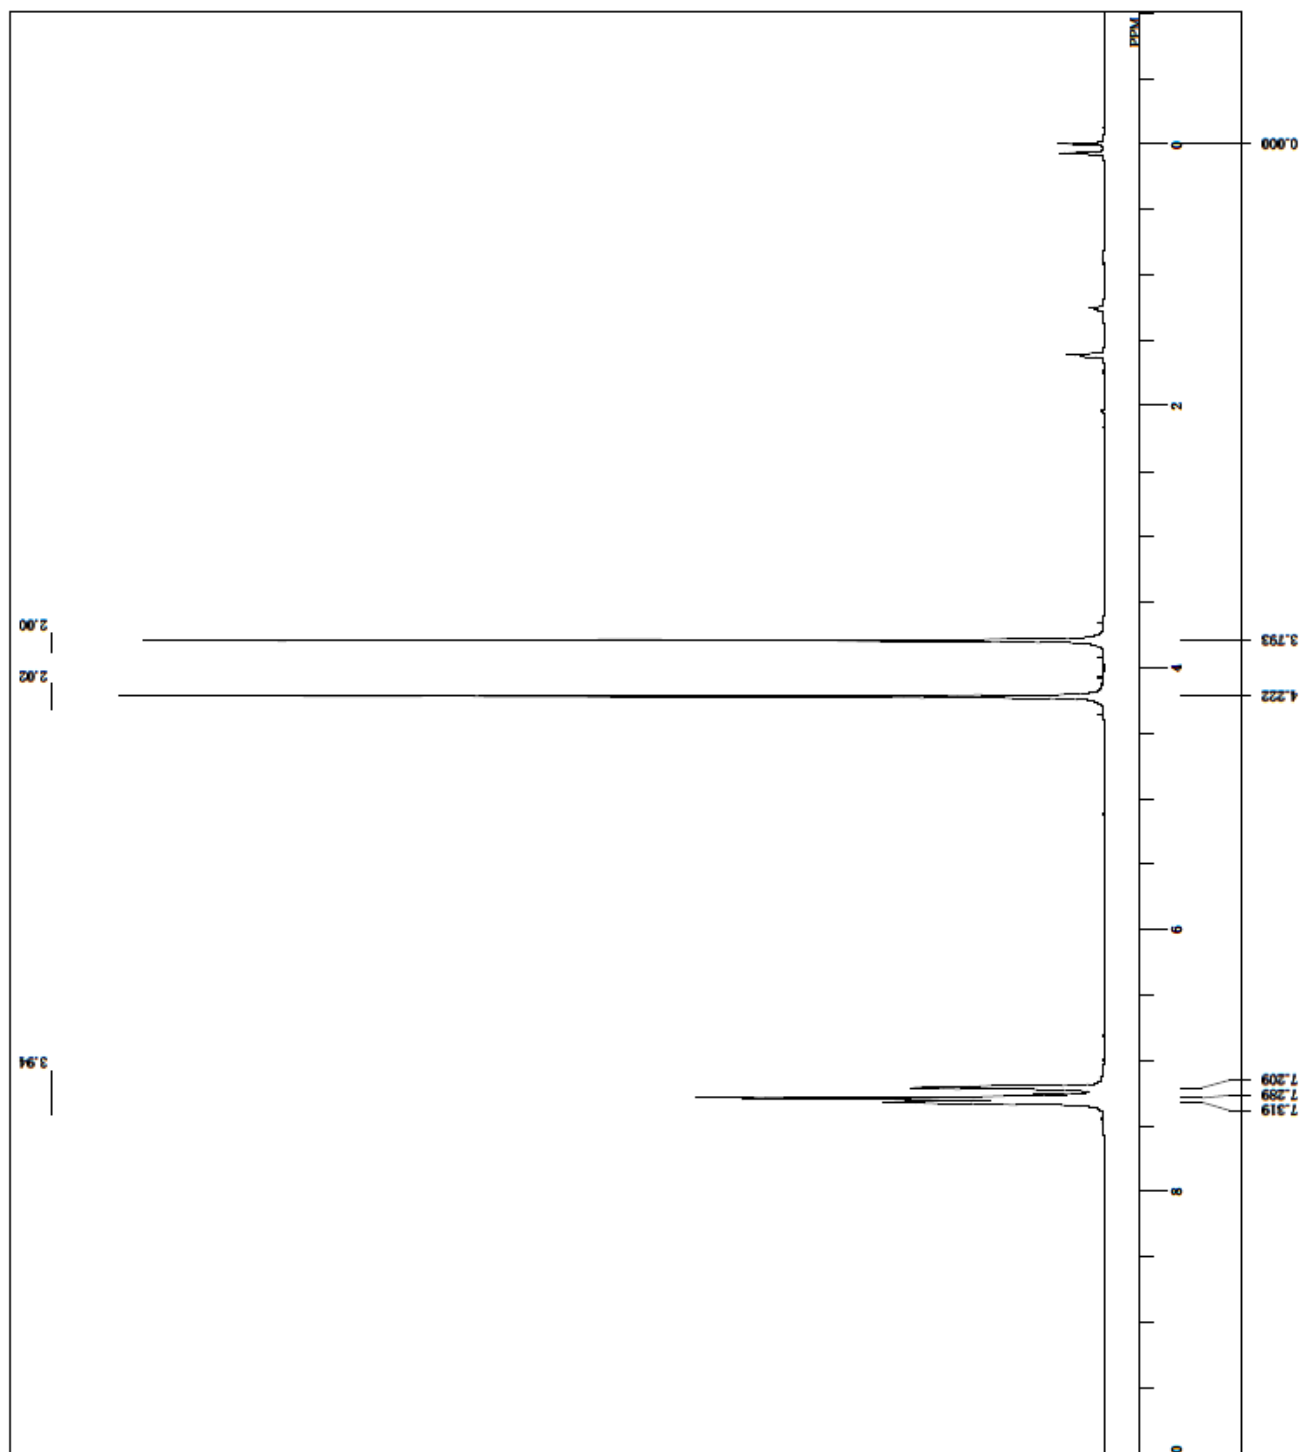

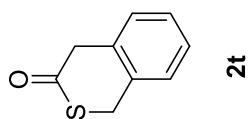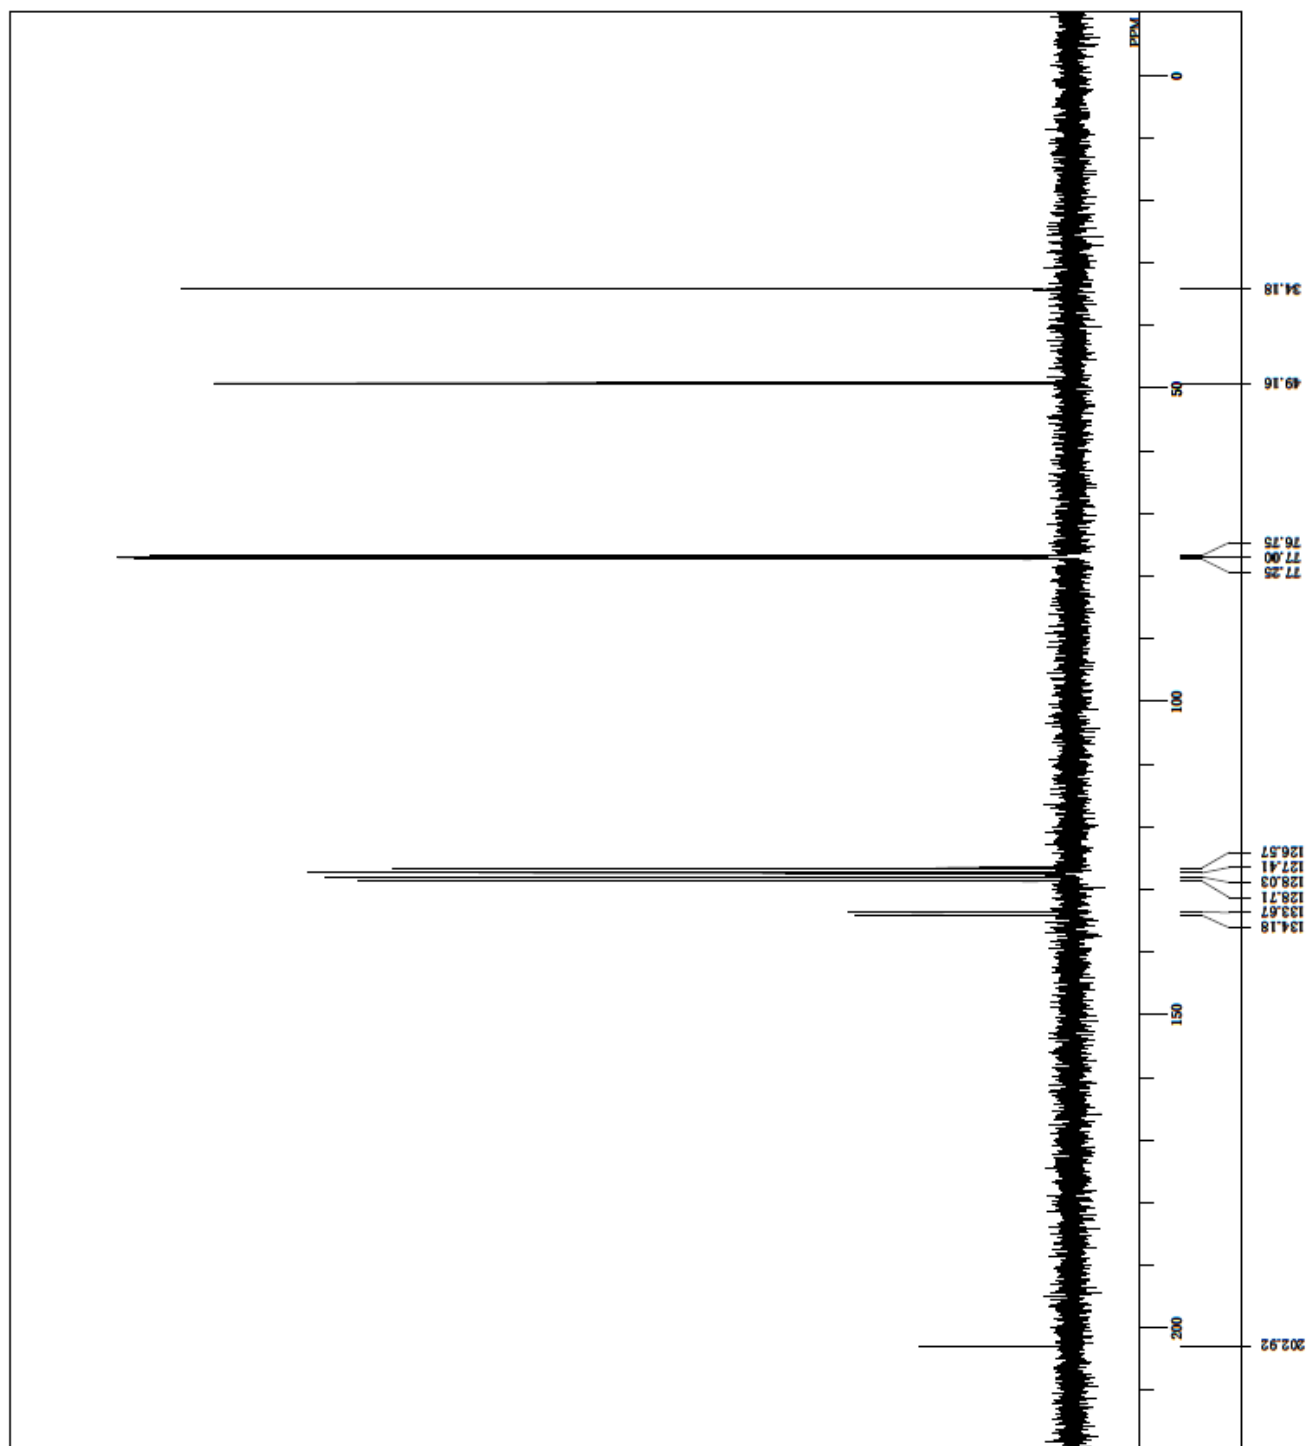

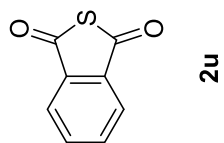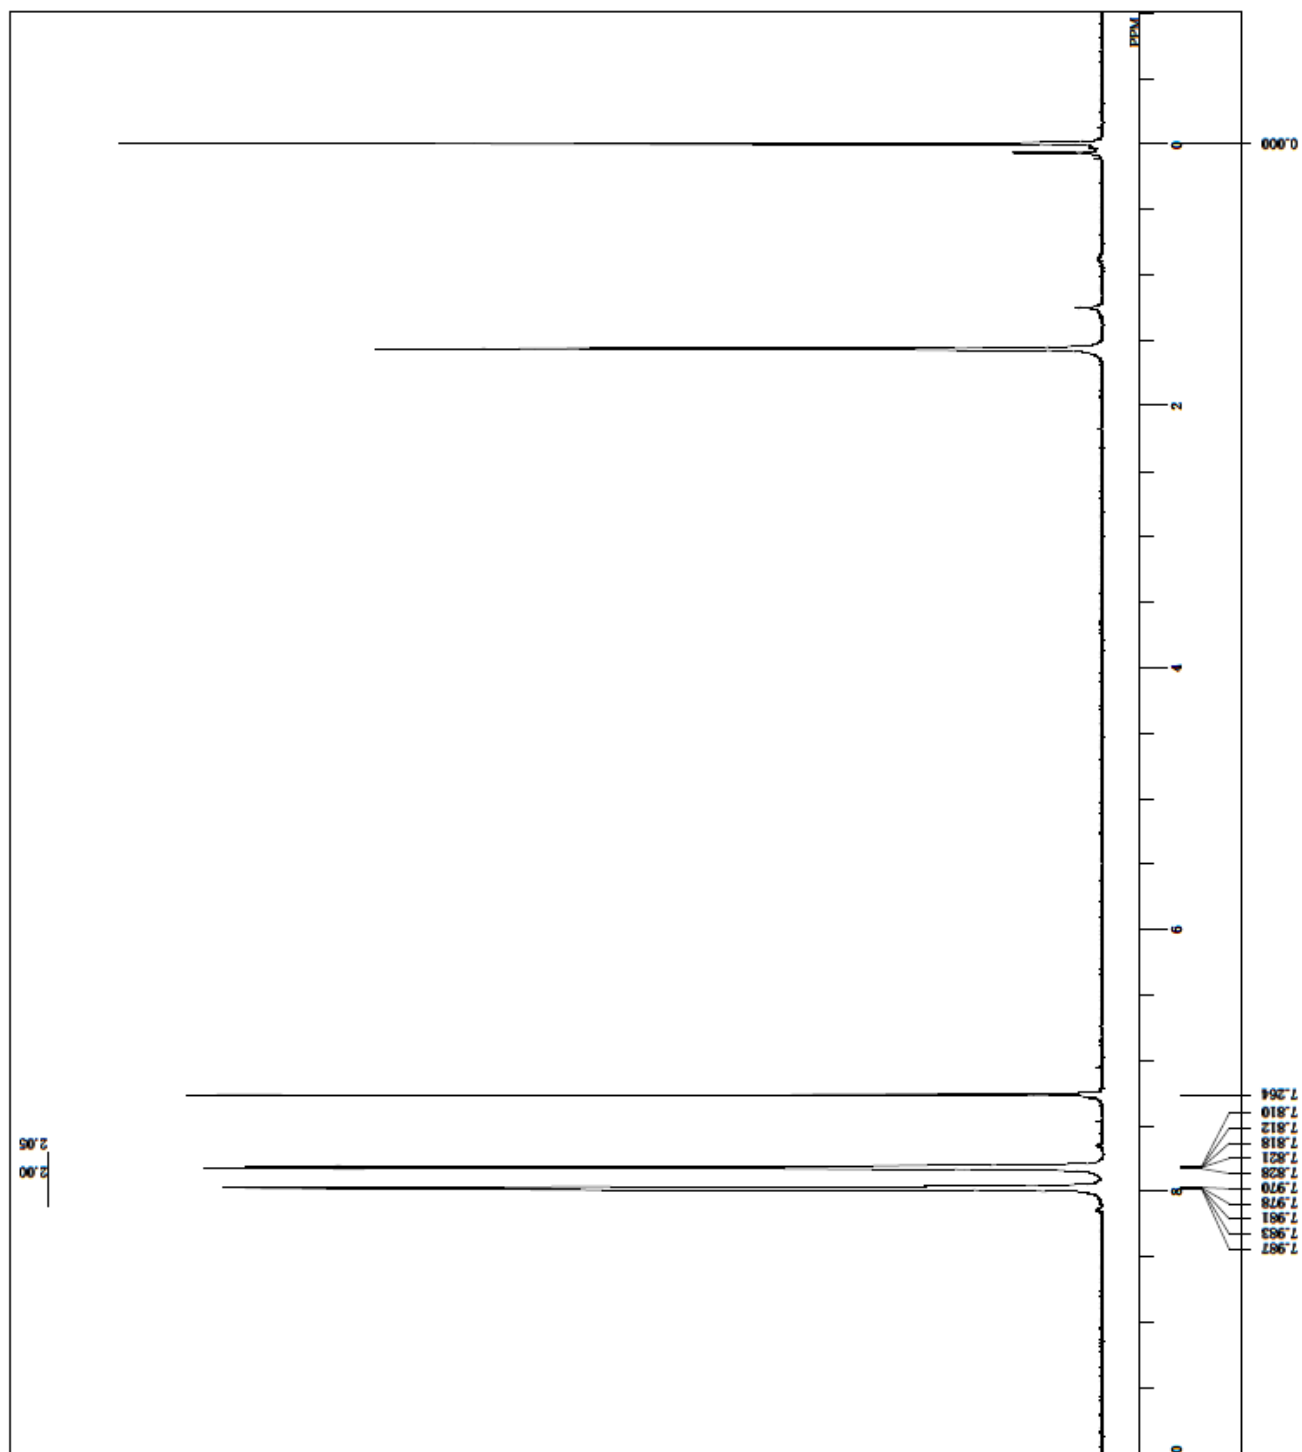

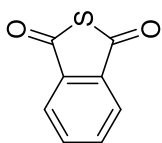

2u

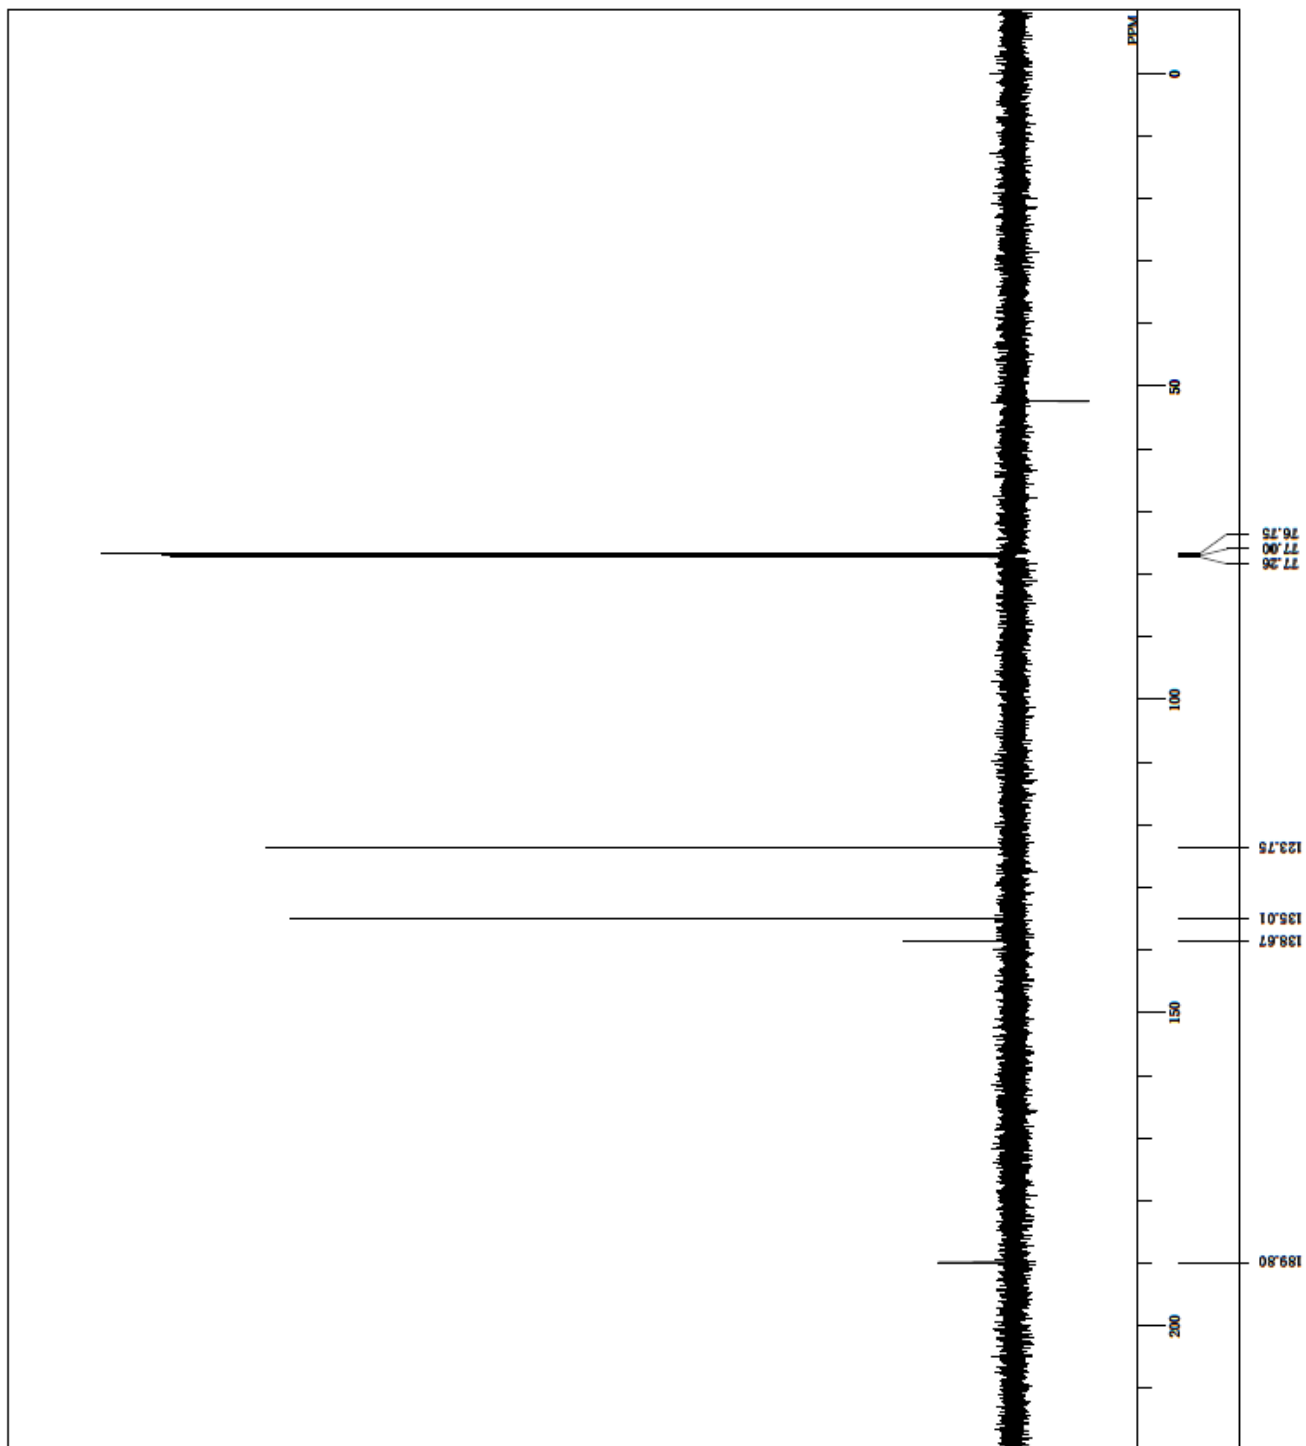

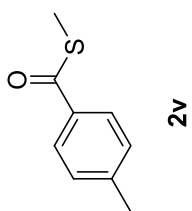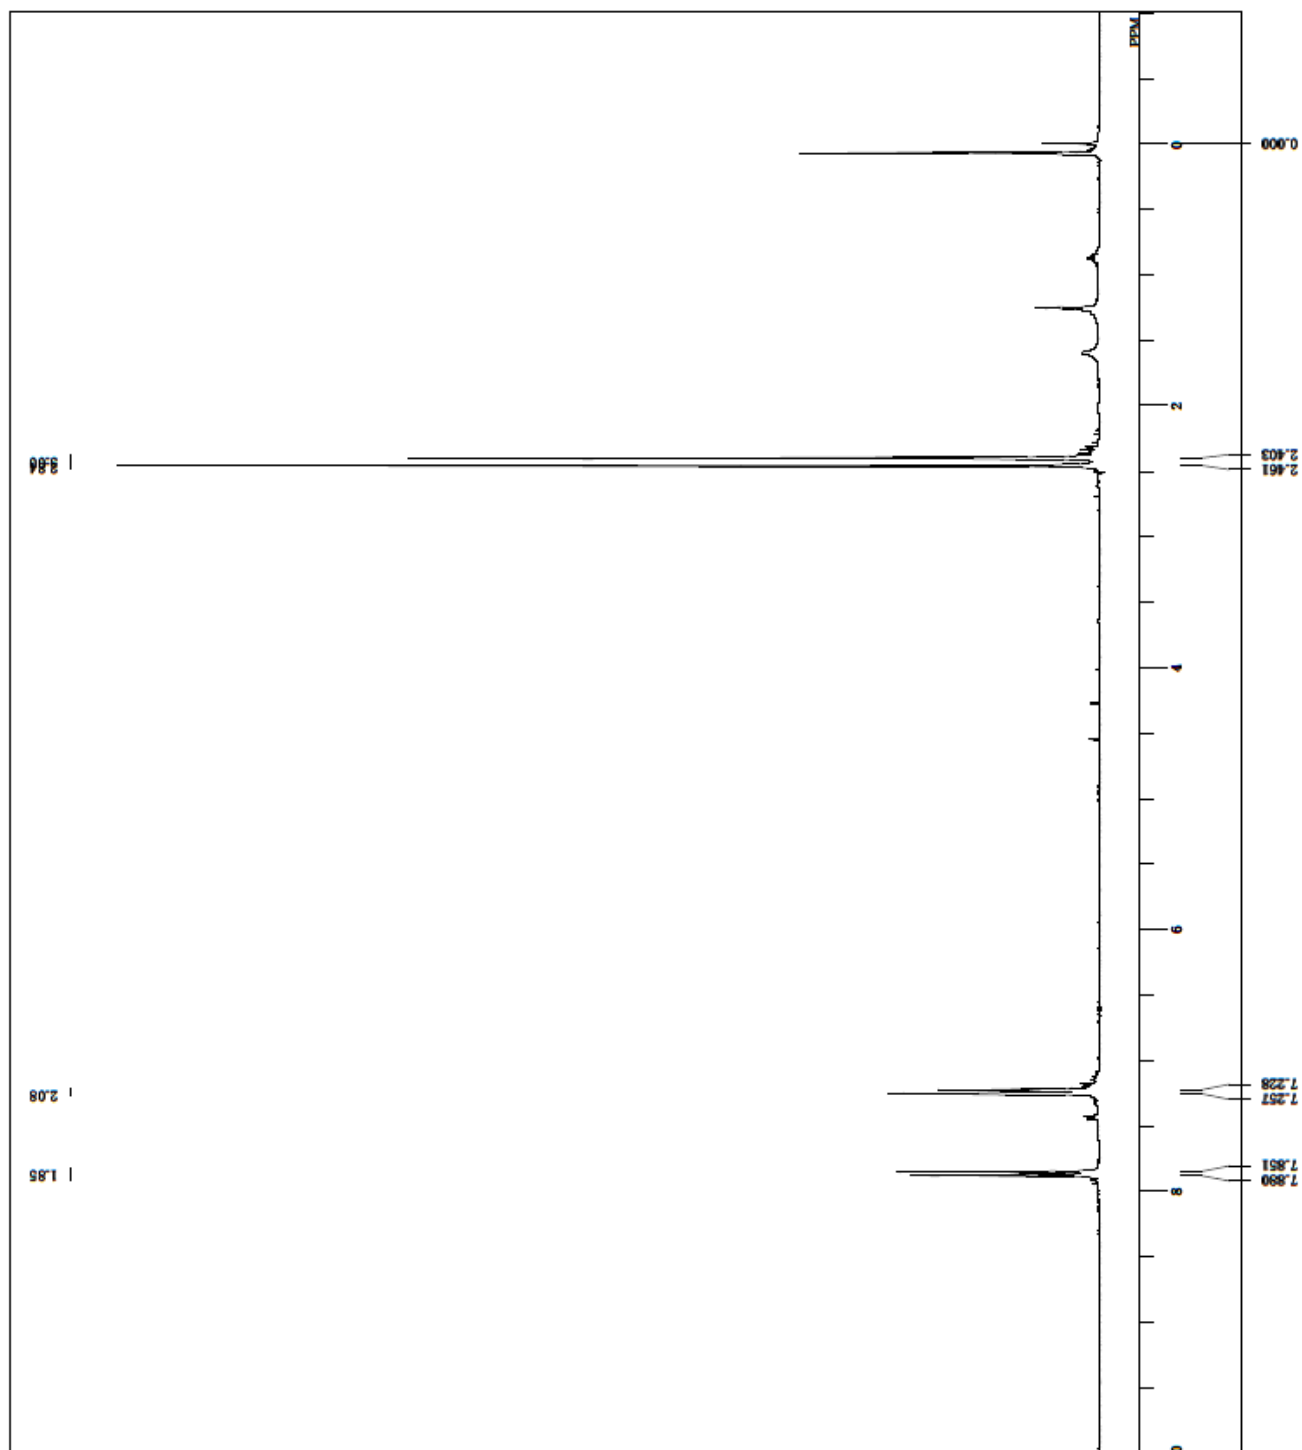

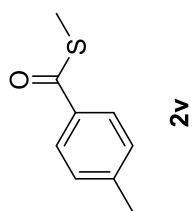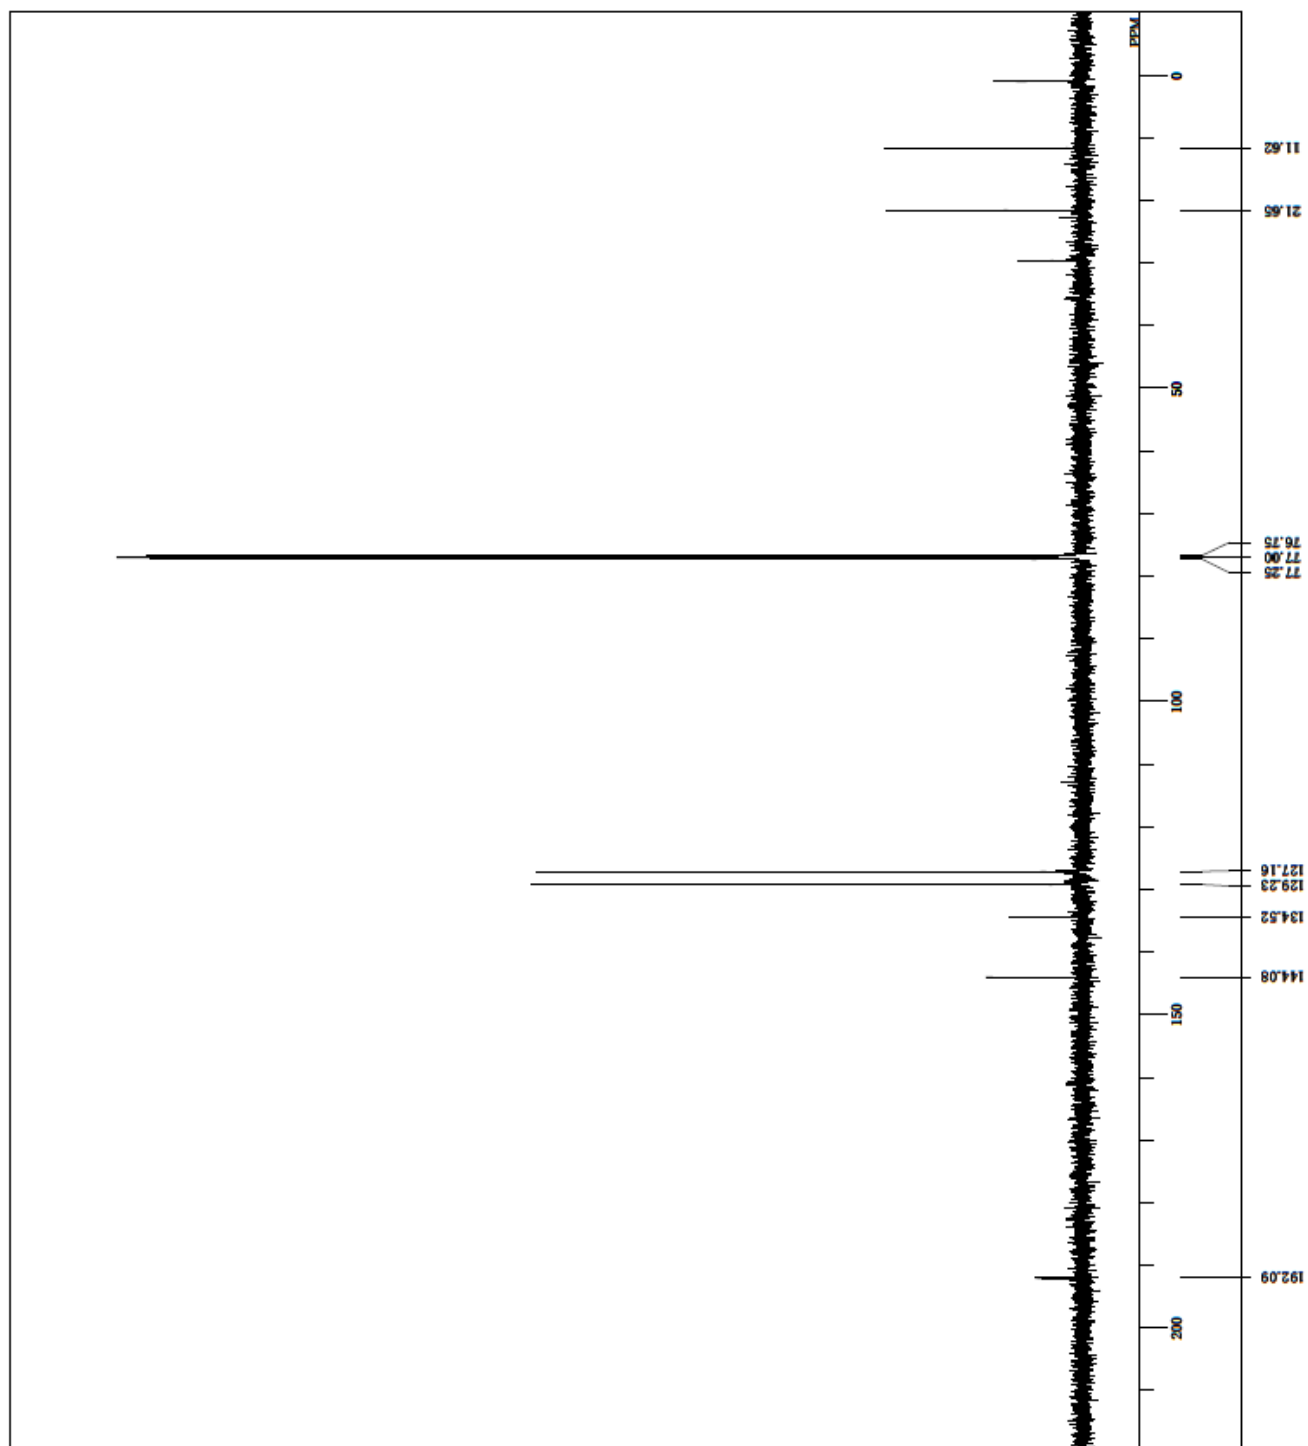

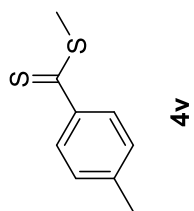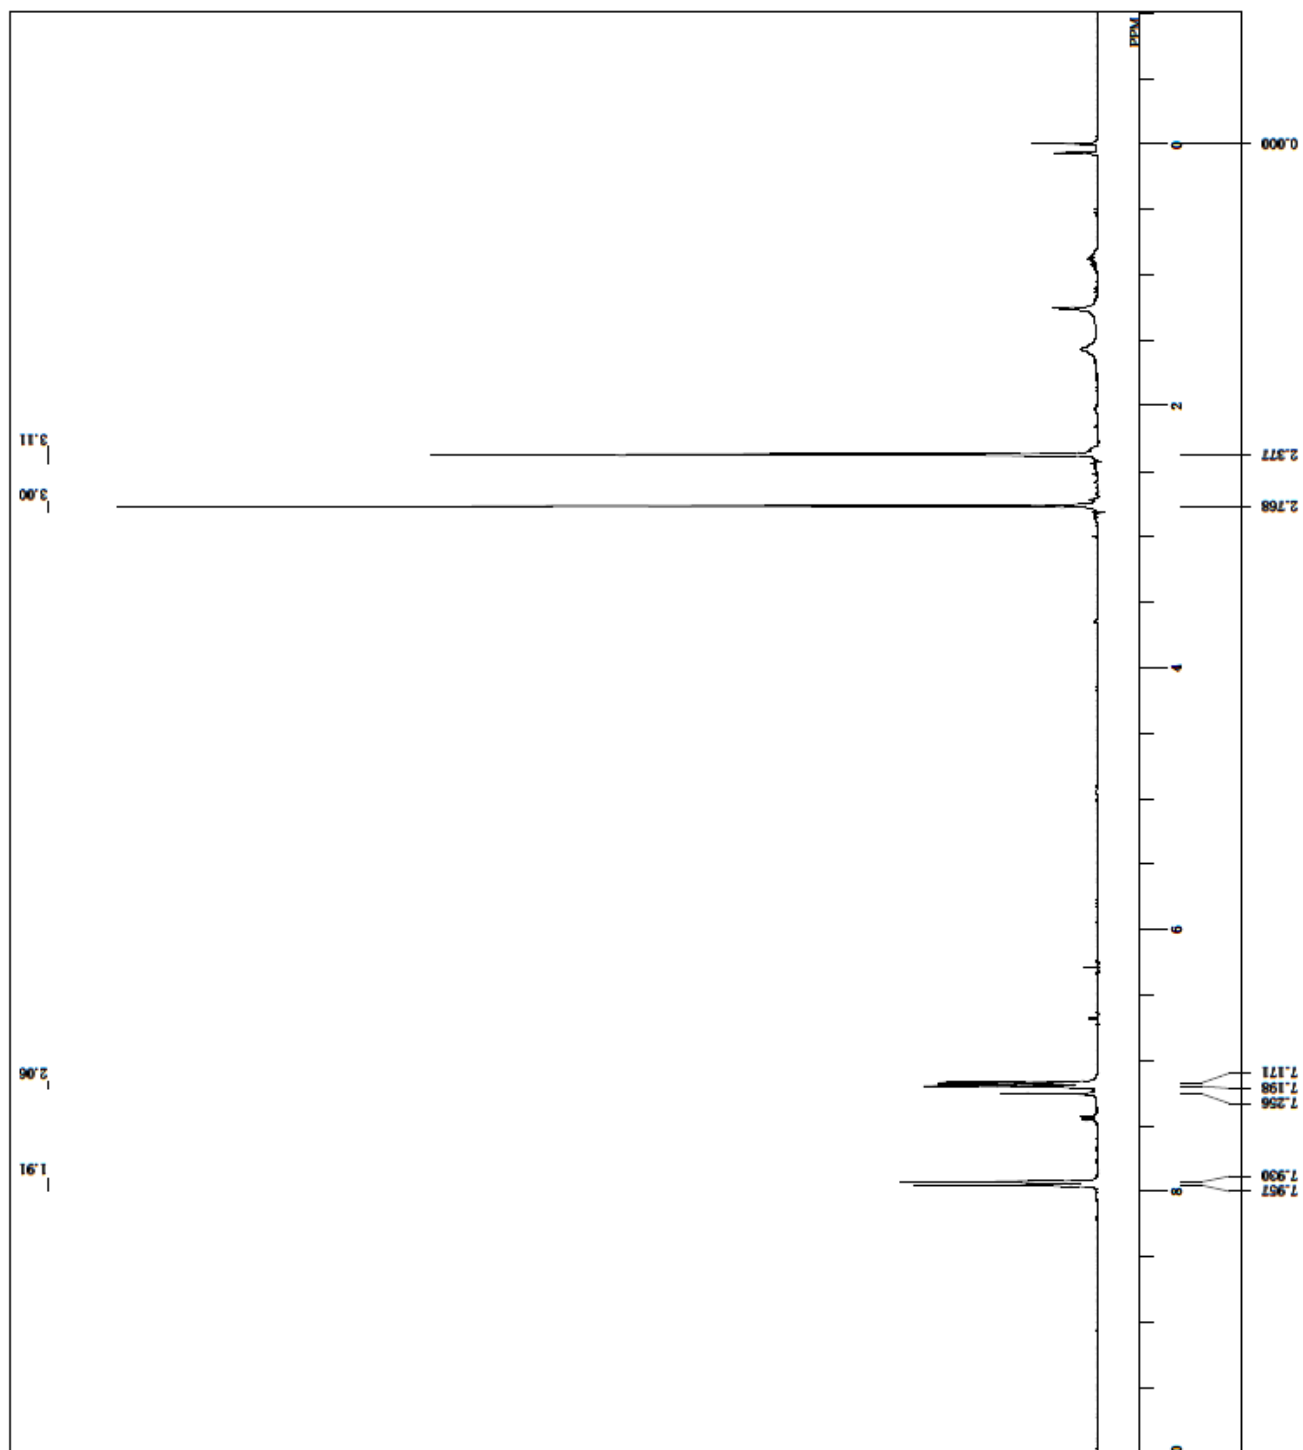

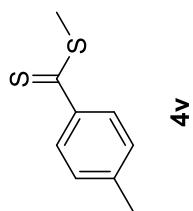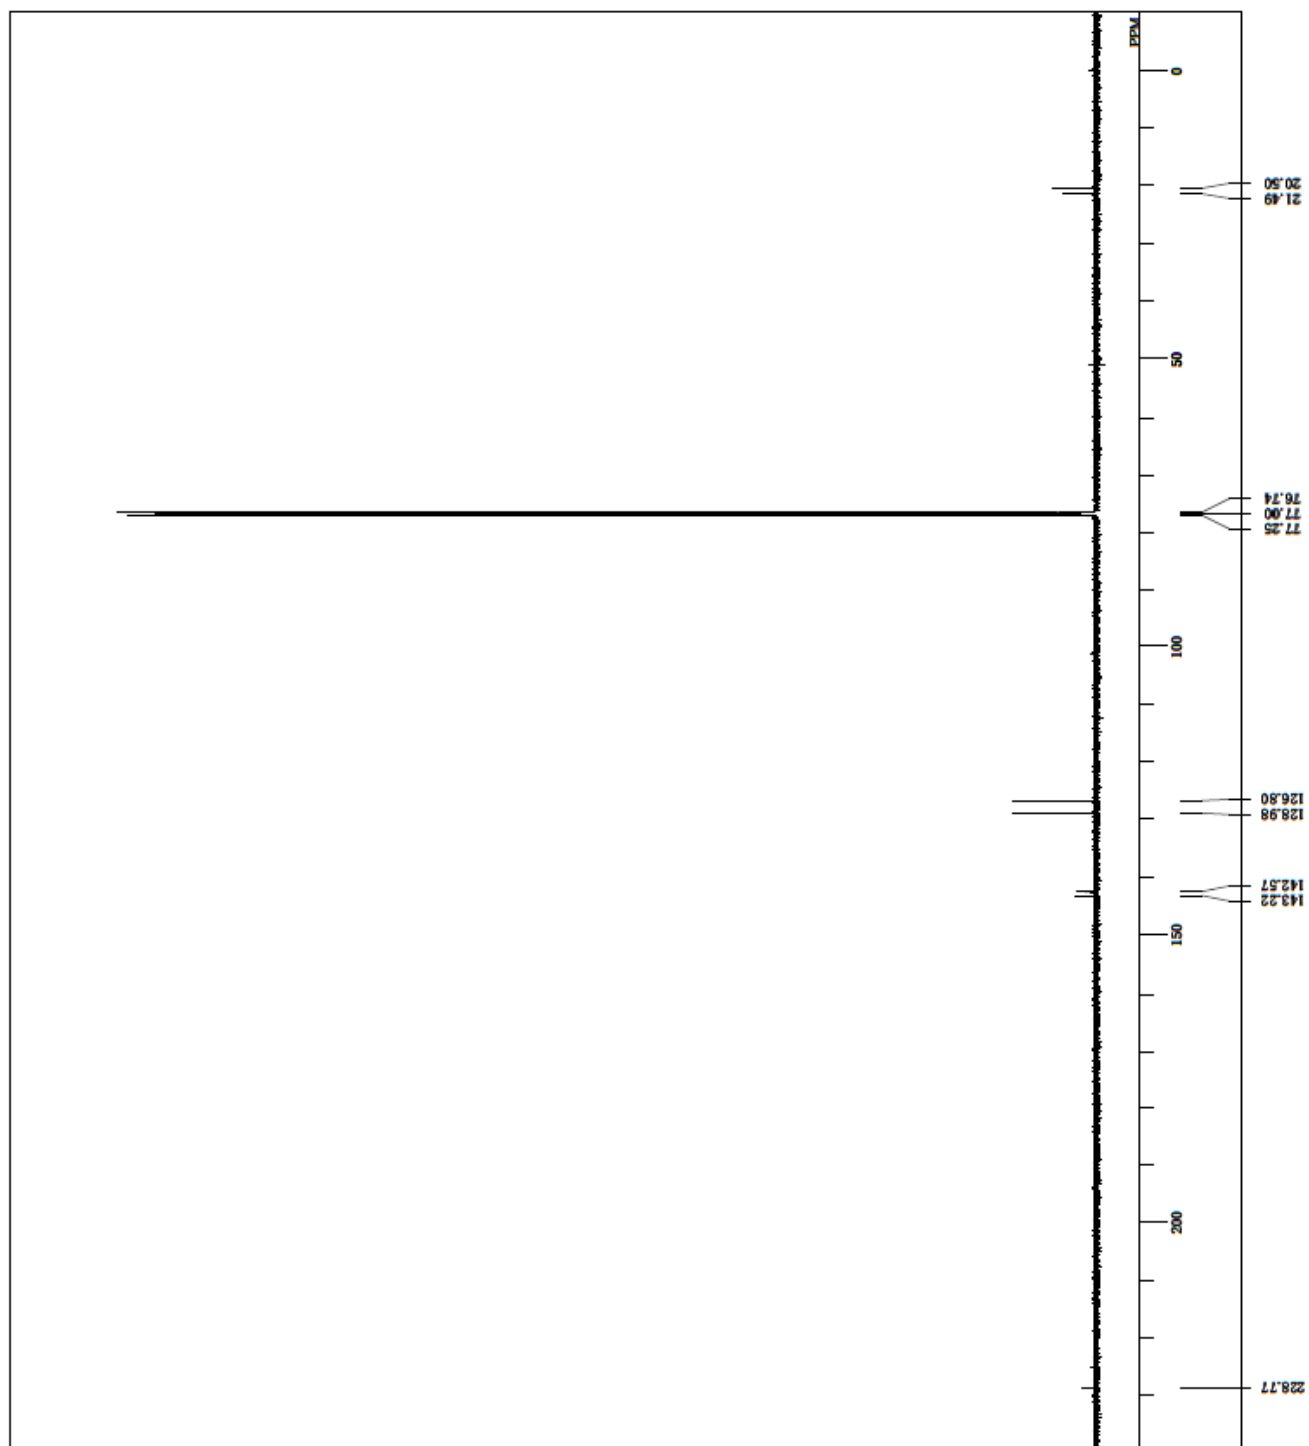

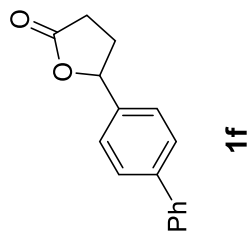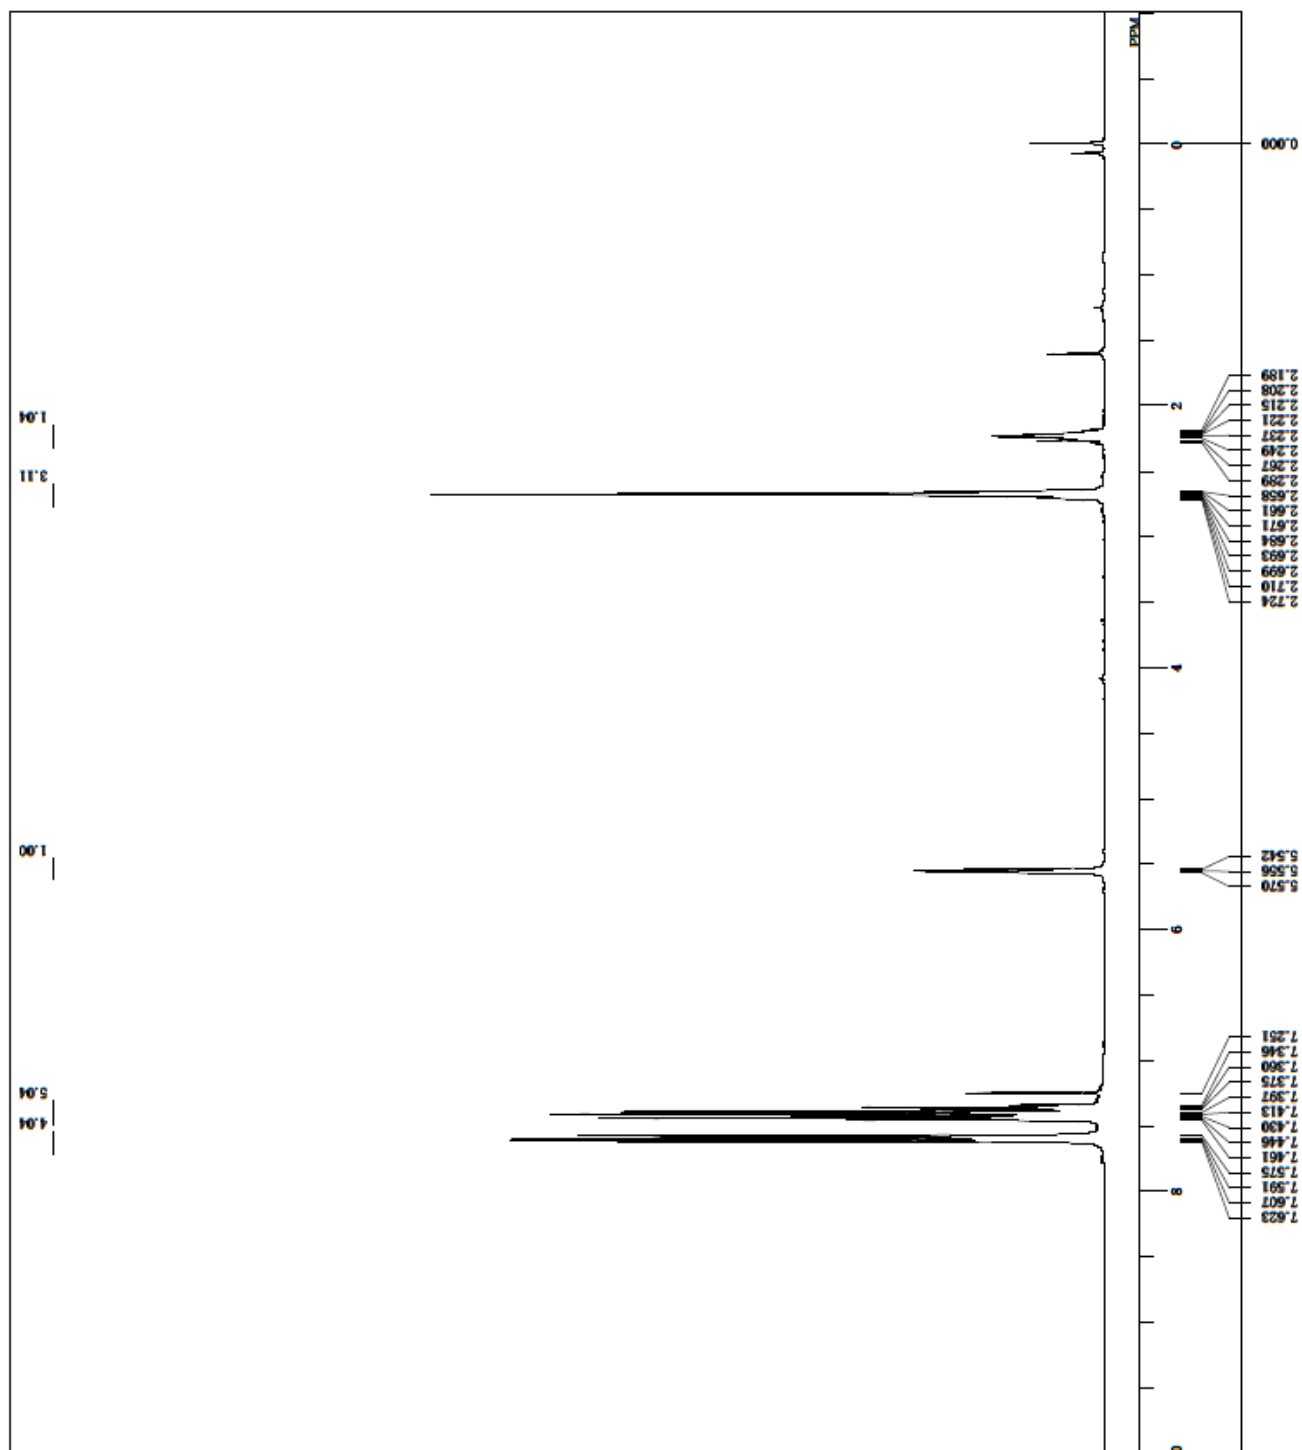

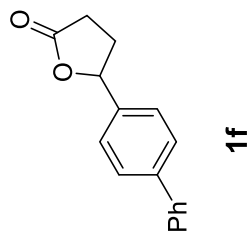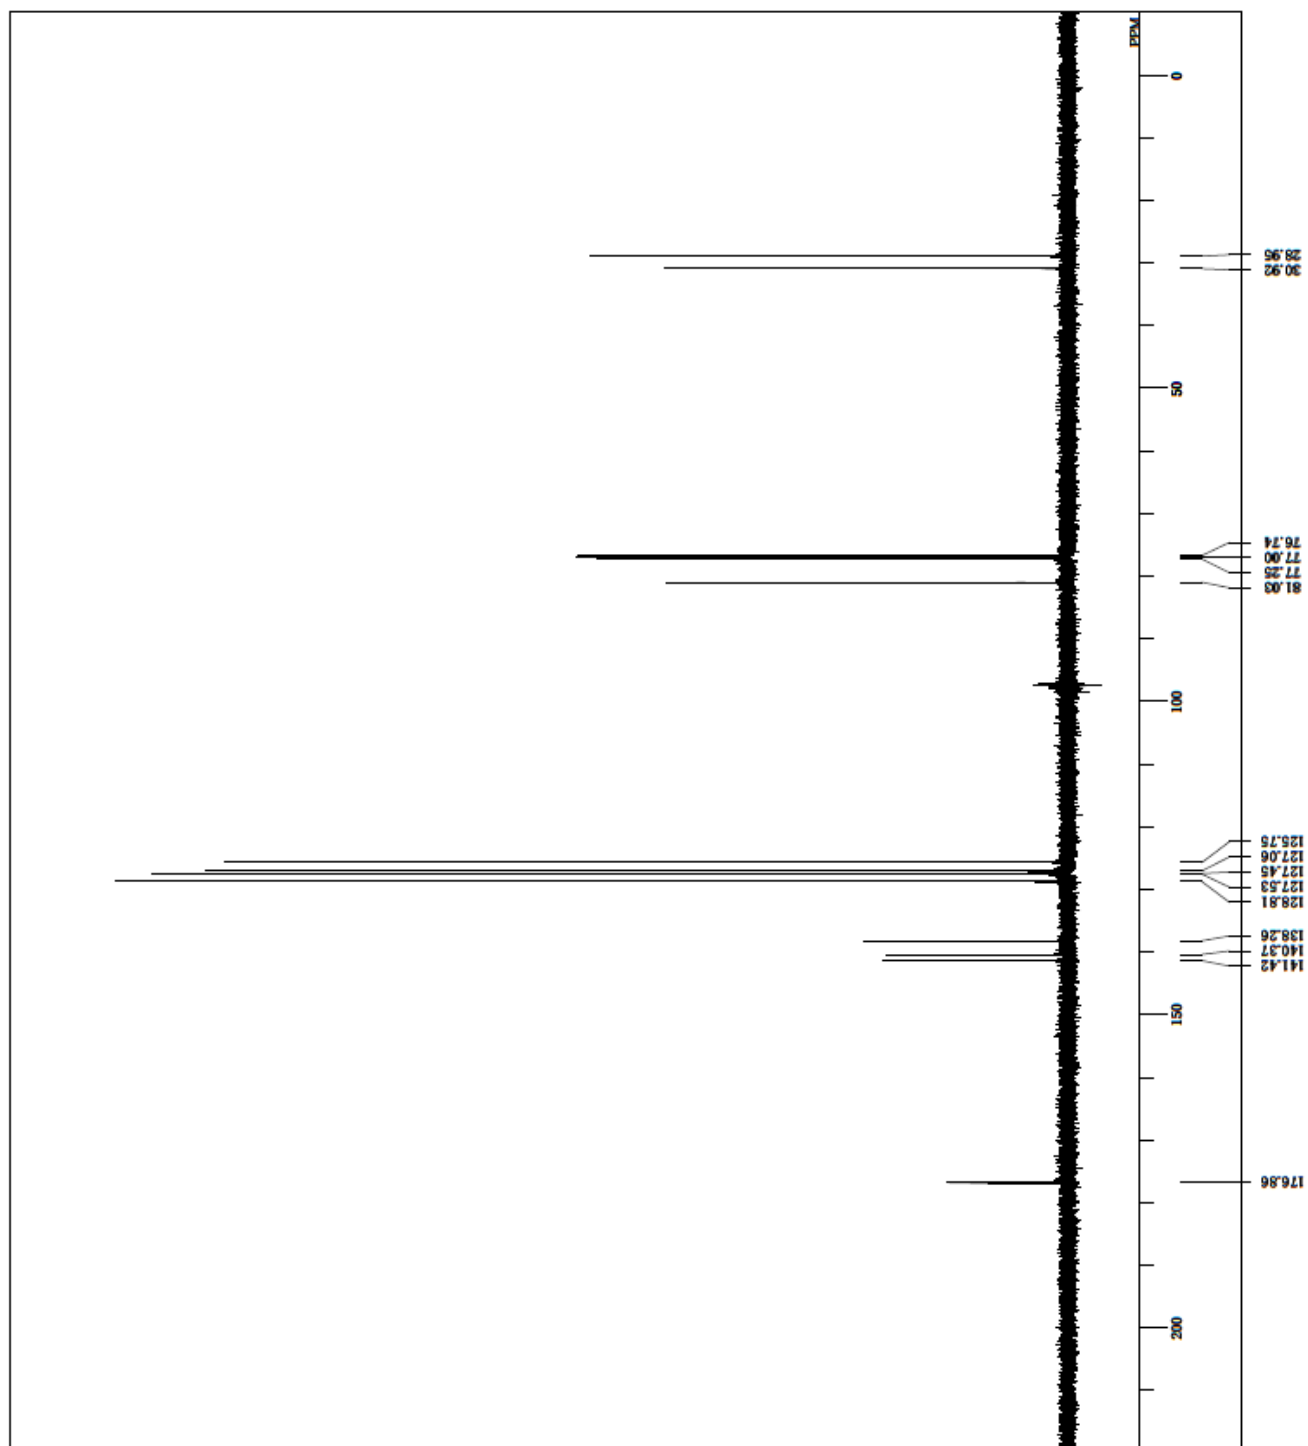

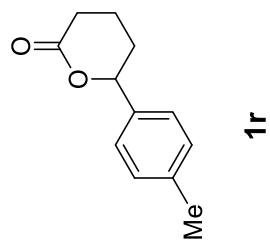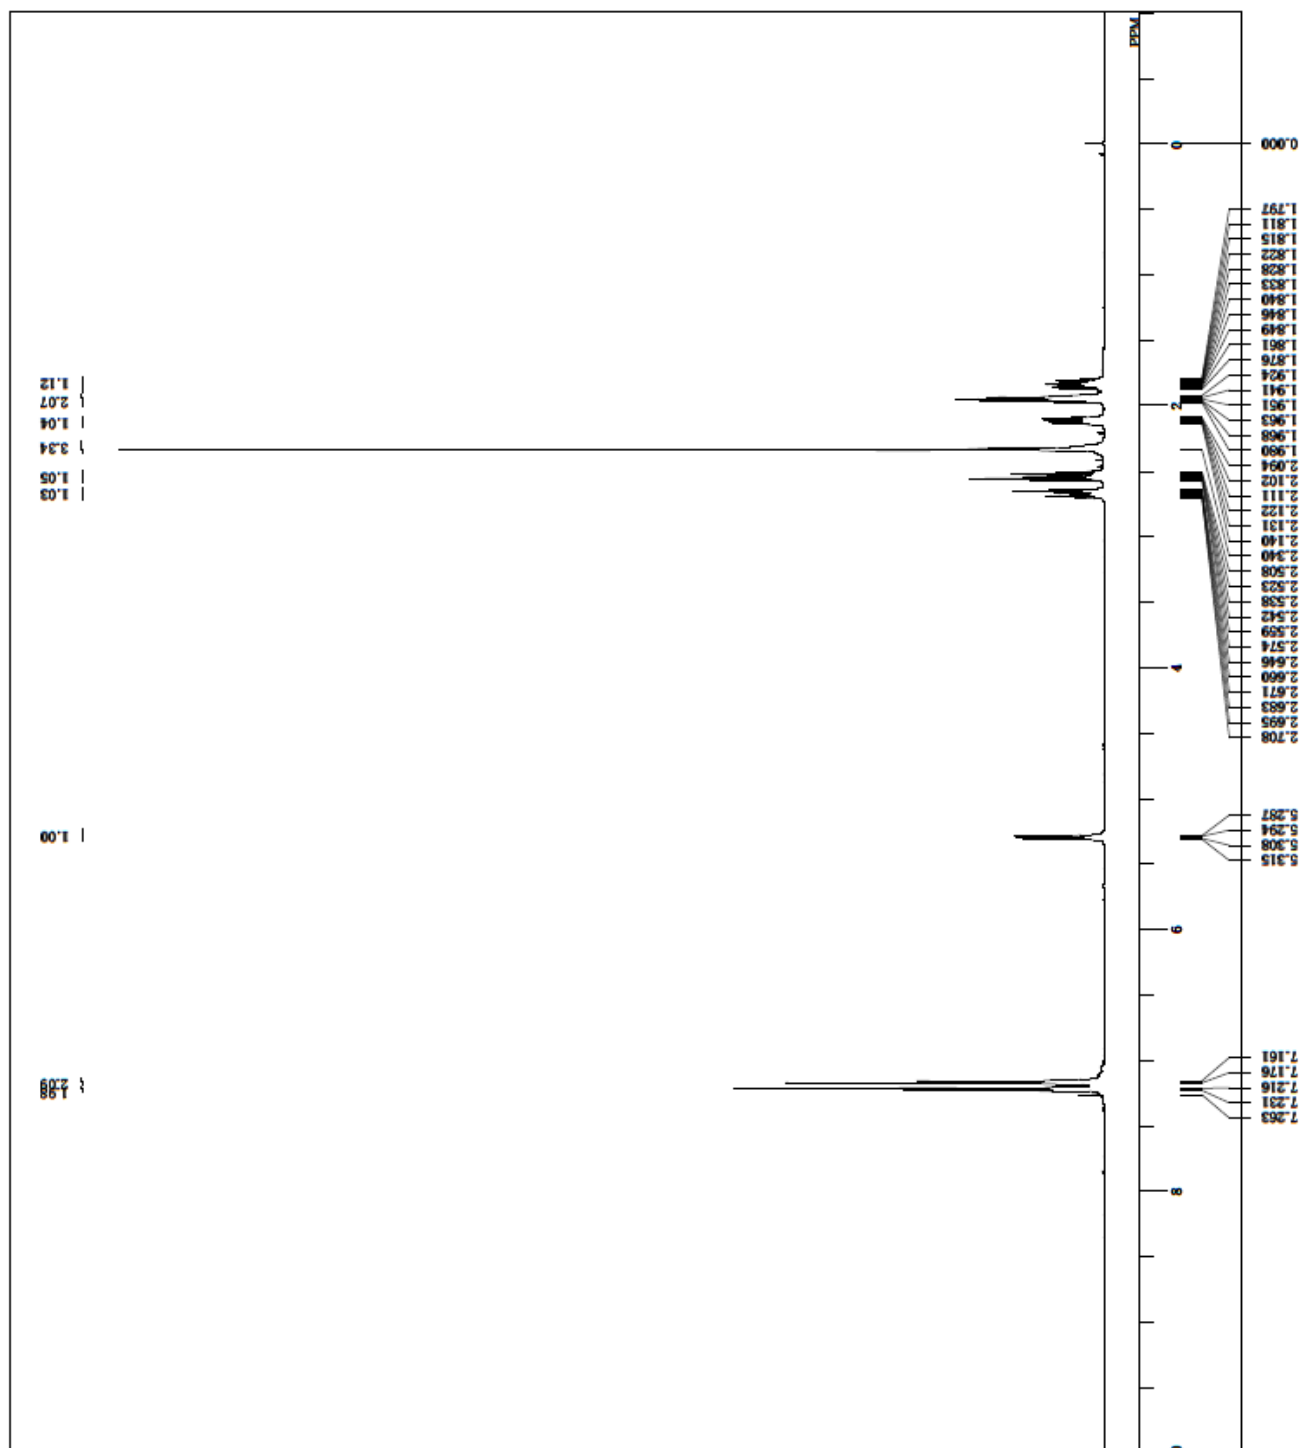

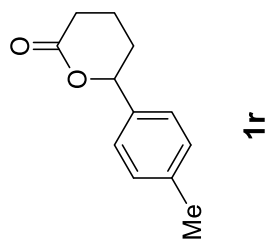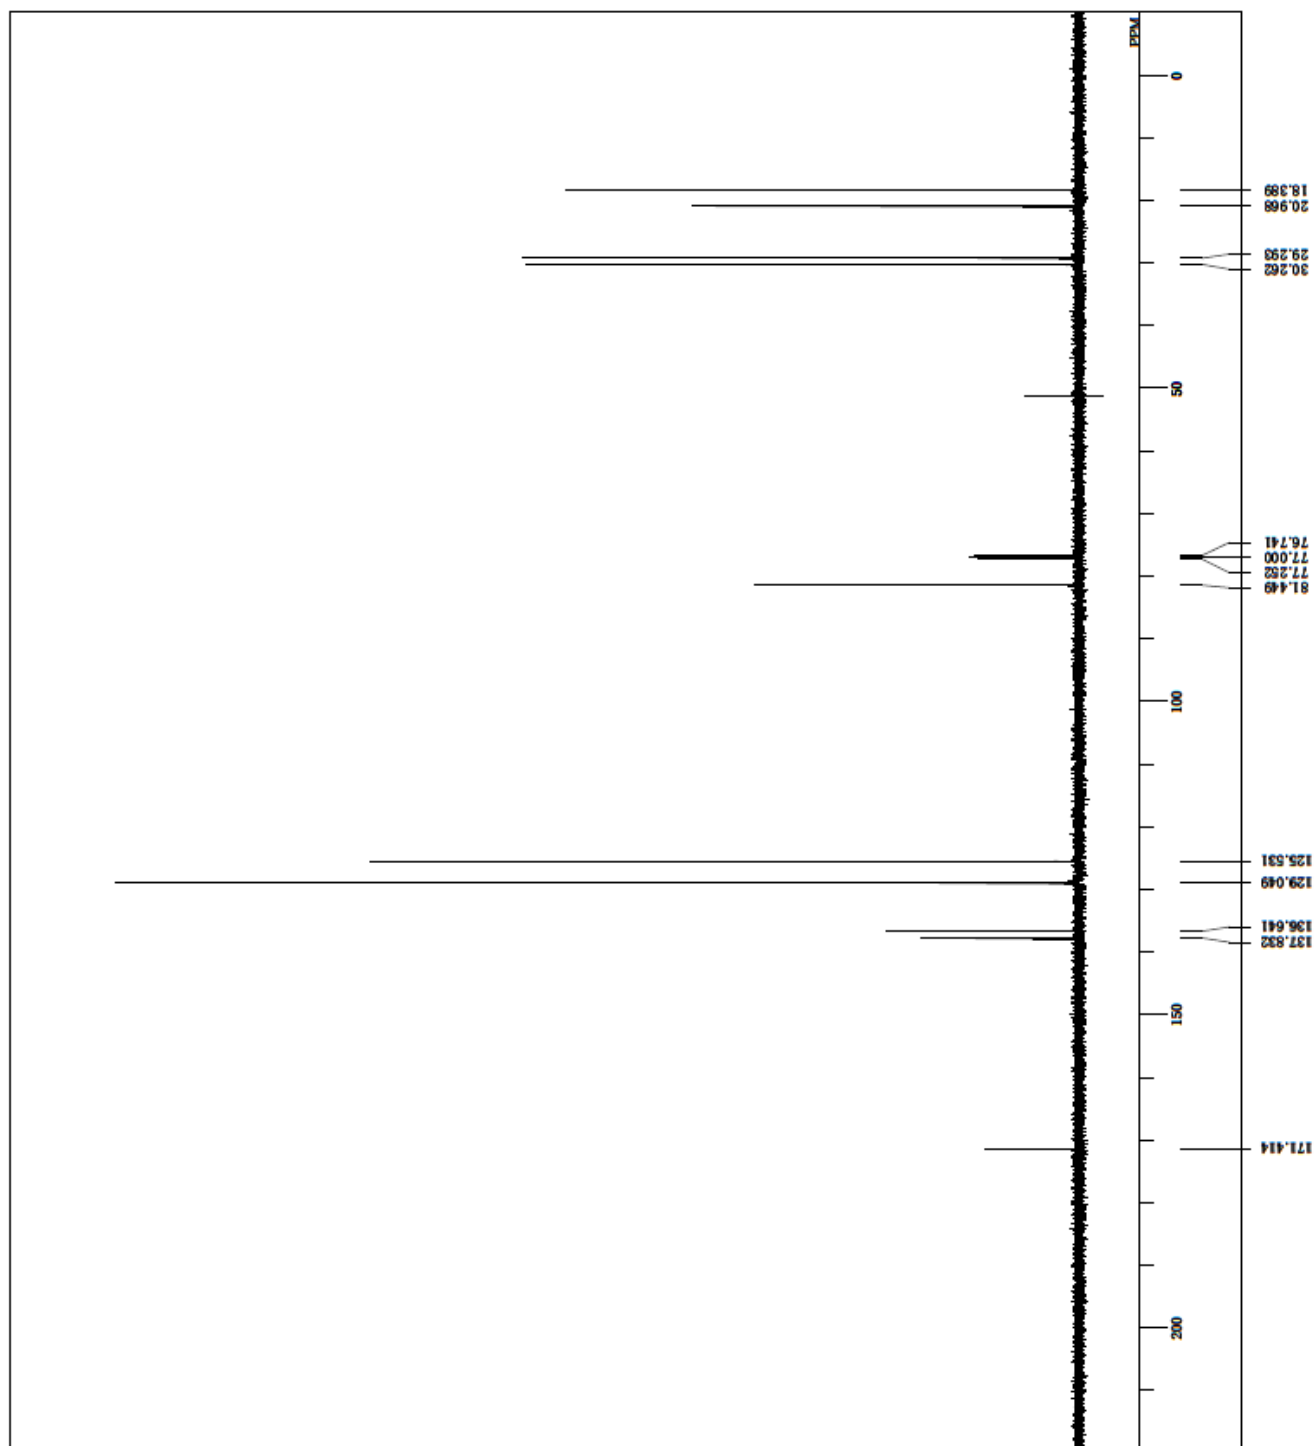

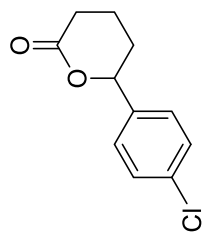

1s

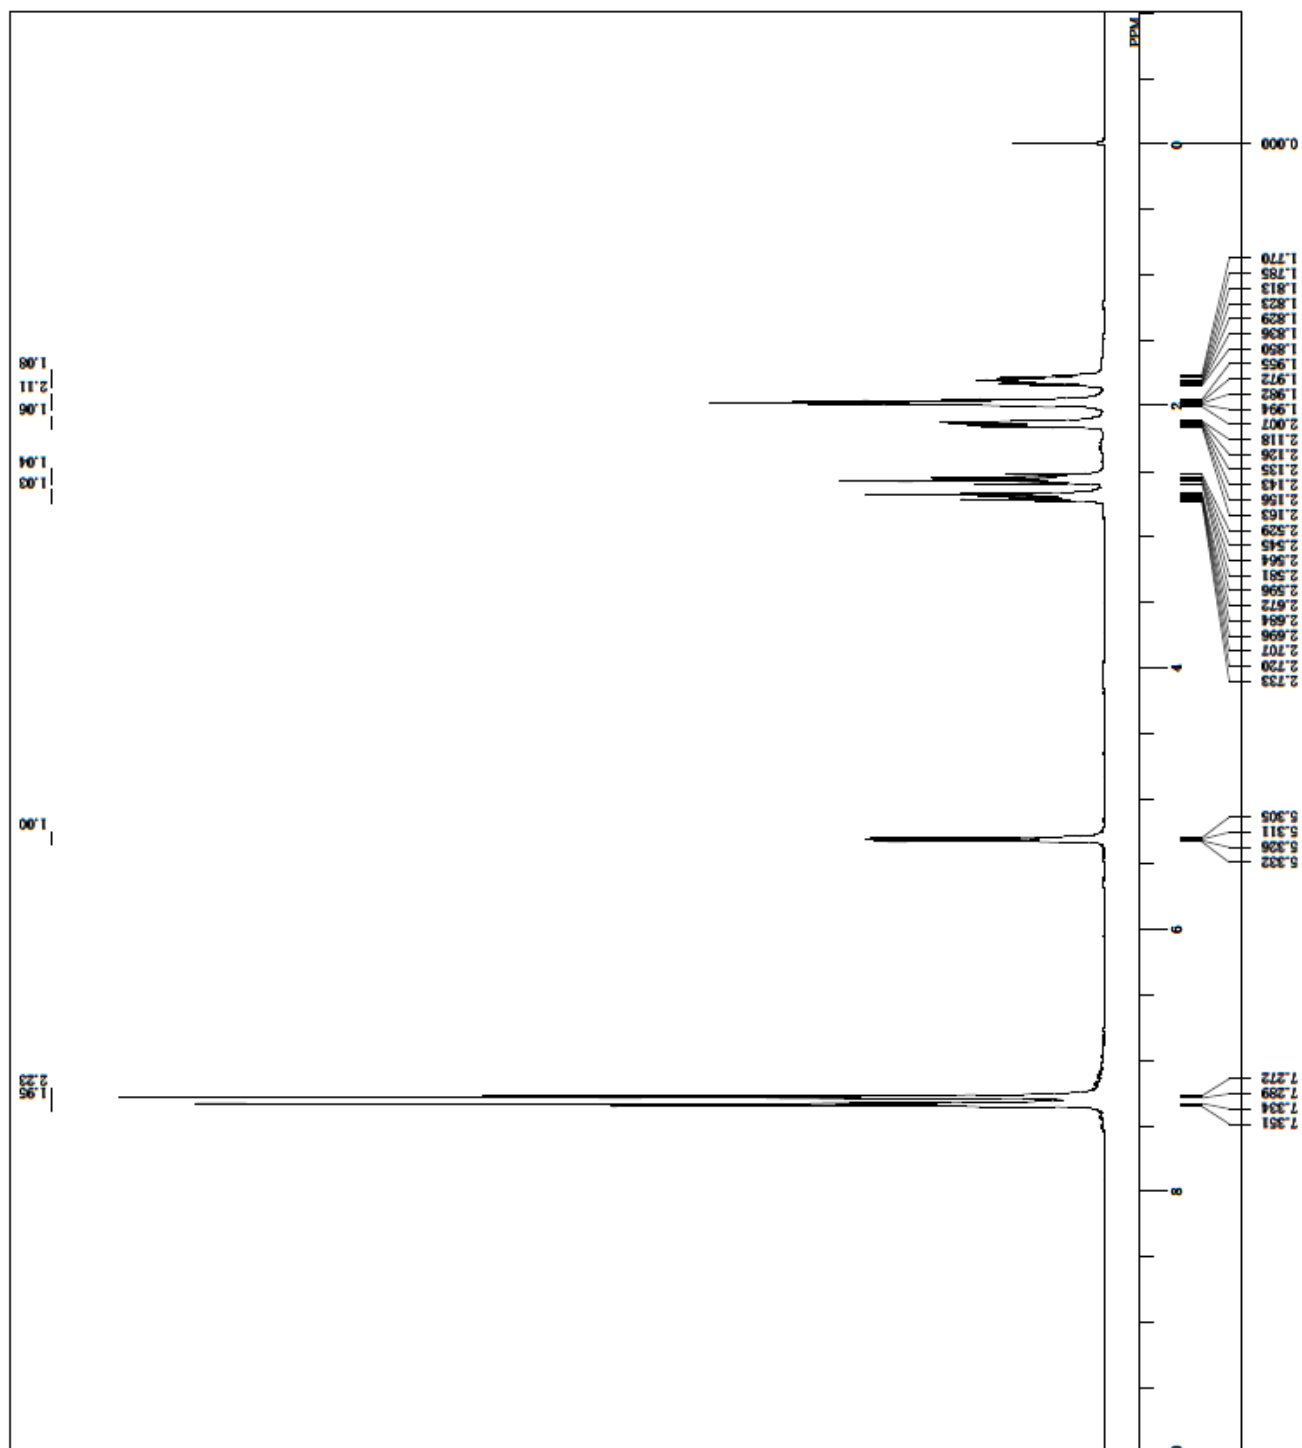

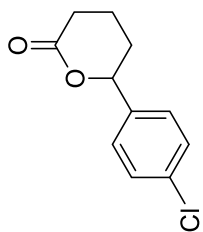

1s

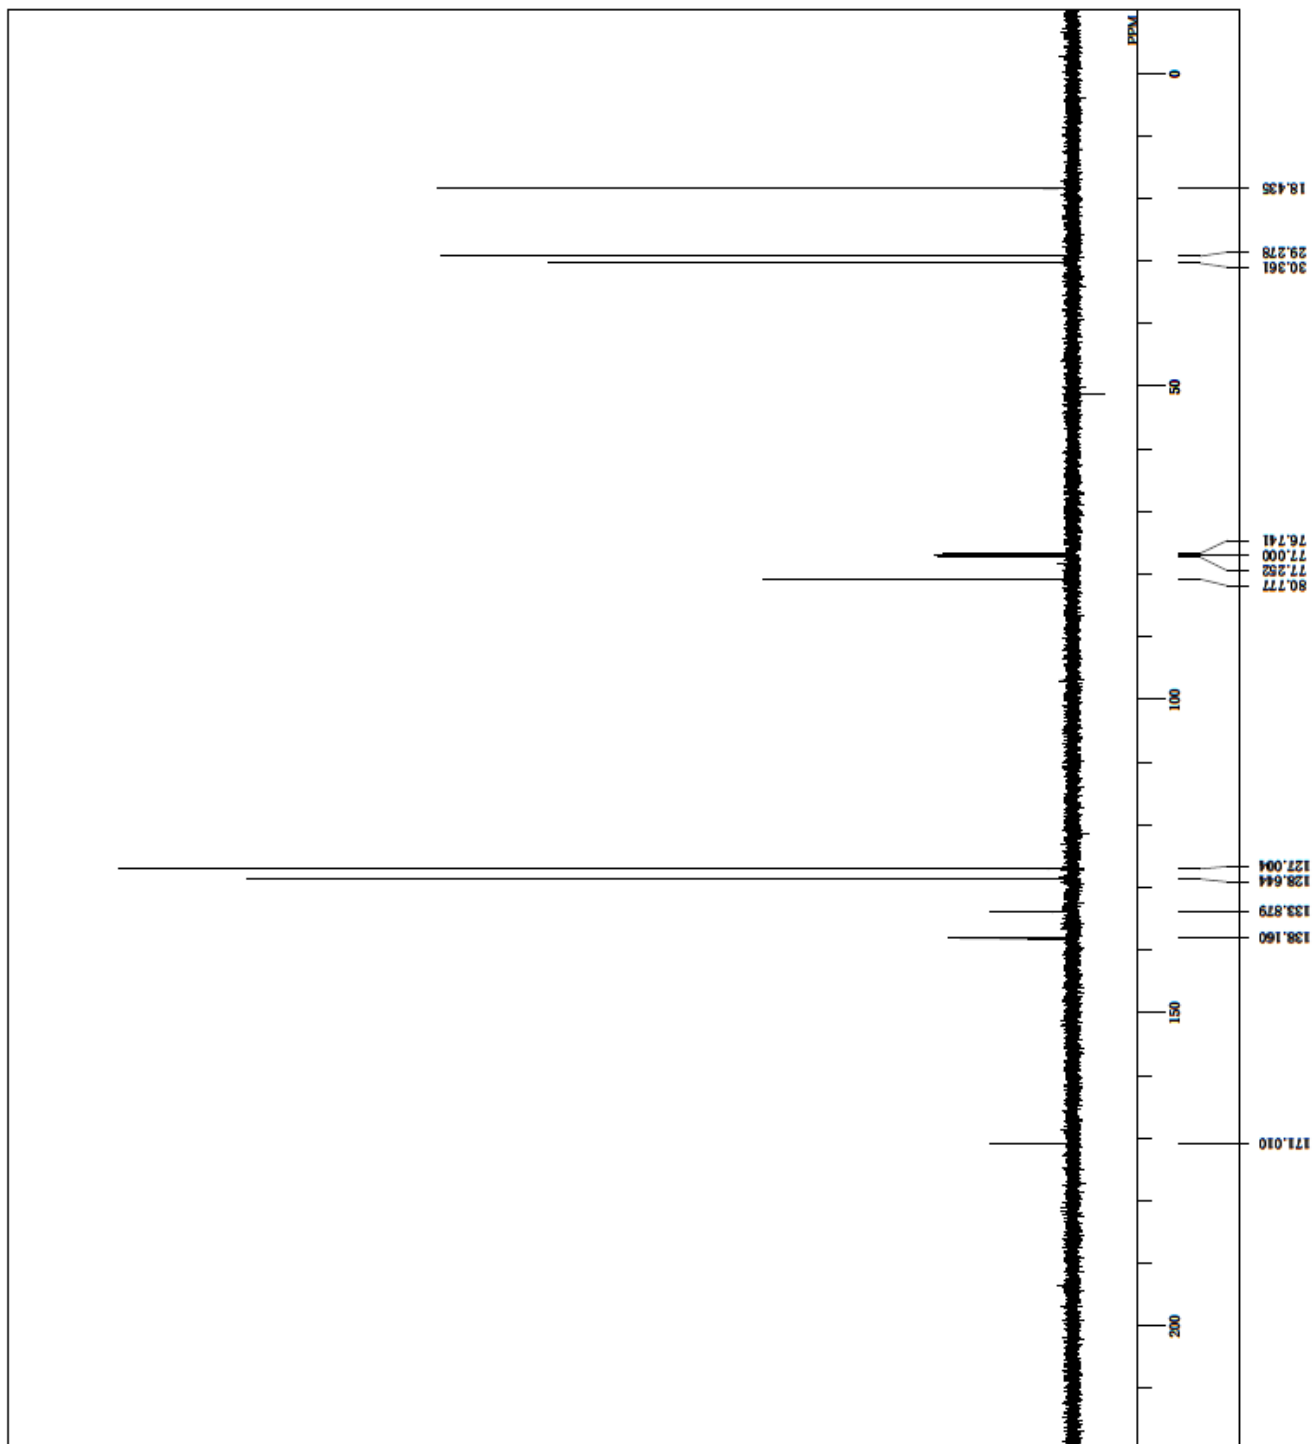

Supplement: Supplementary file 1 [file molecules-23-01339-s001.pdf]
